# Supplementary material for: Pseudo three-component approach to coumarin-annulated azepines: synthesis of coumarin[3,4-b]azepines
Source: Royal Society of Chemistry journal article supplement (doi:10.1039/c7ra09289j), 2017-01-01

## Pseudo Three-Component Approach to Coumarin-Annulated Azepines: Synthesis of Coumarin[3,4-*b*]azepines

Kiran B. Manjappa,<sup>a</sup> Yu-Ting Peng,<sup>a</sup> Teau-Jiuan Liou,<sup>b</sup> and Ding-Yah Yang<sup>a\*</sup>  
<sup>a</sup>*Department of Chemistry, Tunghai University,*

*No. 1727, Sec. 4, Taiwan Boulevard, Xitun District, Taichung 40704, Taiwan*

<sup>b</sup>*Department of Applied English, Chaoyang University of Technology*

*No. 168, Jifeng E. Rd., Wufeng District, Taichung 41349, Taiwan*

\*Corresponding author; Tel: 886-4-2359-7613; Fax: 886-4-2359-0426

Email: [yang@thu.edu.tw](mailto:yang@thu.edu.tw)

### Supporting Information

#### Table of Contents

|   |                                                                                        |        |
|---|----------------------------------------------------------------------------------------|--------|
| 1 | Instrumentation .....                                                                  | S2     |
| 2 | Experimental procedure of synthesized compounds .....                                  | S2-S6  |
| 3 | References.....                                                                        | S7     |
| 4 | Copies of <sup>1</sup> H and <sup>13</sup> C NMR spectra of synthesized compounds..... | S8-S56 |

## 1. Instrumentation

*Instrumentation.* Melting points were determined on a Mel-Temp melting point apparatus in open capillaries and are uncorrected. Infrared (IR) spectra were recorded using 1725XFT-IR spectrophotometer. High resolution mass spectra (HRMS) were obtained on a Thermo Fisher Scientific Finnigan MAT95XL spectrometer using magnetic sector analyzer  $^1\text{H}$  NMR (400 MHz) and  $^{13}\text{C}$  NMR (100, or 150 MHz) spectra were recorded on a Varian VXR300 or Bruker 400/600 spectrometer. Chemical shifts were reported in parts per million on the  $\delta$  scale relative to an internal standard (tetramethylsilane, or appropriate solvent peaks) with coupling constants given in hertz.  $^1\text{H}$  NMR multiplicity data are denoted by s (singlet), d (doublet), t (triplet), q (quartet), m (multiplet). Analytical thin-layer chromatography (TLC) was carried out on Merck silica gel 60G-254 plates (25 mm) and developed with the solvents mentioned. Visualization was accomplished by using portable UV light, ninhydrin spray and iodine chamber. Flash chromatography was performed in columns of various diameters with Merck silica gel (230-400 mesh ASTM 9385 kieselgel 60H) by elution with the solvent systems. Solvents, unless otherwise specified, were reagent grade and distilled once prior to use. All new compounds exhibited satisfactory spectroscopic and analytical data.

## 2. Synthesis of 4-hydroxy-3-nitrocoumarin (6)

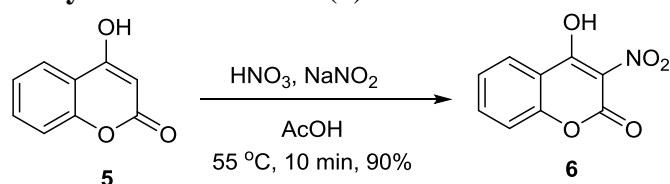

To a stirred suspension of 4-hydroxycoumarin (**5**, 4.0 g, 24.67 mmol, 1.0 equiv.) in AcOH (50 mL) was added sodium nitrite (17 mg, 0.25 mmol, 0.01 equiv.) in one portion and  $\text{HNO}_3$  (3.5 mL) dropwise. The resulting mixture was stirred at room temperature for 5 min and followed by heating at 70 °C for 30 min in an oil bath. As the brown solution attained to room temperature, the pure compound crystallized out from the solution. These crystals were filtered, washed with hexanes (6 x 50 mL), and dried *in vacuo* to afford 3-nitro-4-hydroxycoumarin (**6**) as off-yellow shiny crystals. 4.6 g; yield 90%;  $R_f = 0.15$  (10% MeOH/DCM); mp 176–177 °C (lit.<sup>1</sup> 177 °C);  $^1\text{H}$  NMR ( $\text{CDCl}_3$ , 300 MHz)  $\delta$  9.41 (bs, 1H), 7.88 (dd,  $J = 7.8, 1.5$  Hz, 1H), 7.52 (td,  $J = 8.1, 1.8$  Hz, 1H), 7.24–7.16 (m, 2H).

## 3. Synthesis of 3-amino-4-hydroxycoumarin (7)

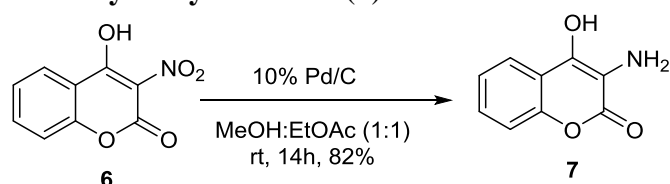

To a suspension of 4-hydroxy-3-nitrocoumarin (**6**, 4.0 g, 22.58 mmol) in ethanol (200 mL) was added 10% Pd/C (50 mg) at room temperature. The resulting solution was stirred under  $\text{H}_2$  atmosphere for 6 hours at that temperature. After the completion of the reaction, the suspension was filtered through the celite pad, washed extensively with MeOH (3 x 30 mL each), acetone (3 x 30 mL), and concentrated to afford an off-white solid. 2.8 g; yield 82%;  $R_f = 0.16$  (10% MeOH/DCM); mp 216 °C (lit.<sup>2</sup> 222–224 °C);  $^1\text{H}$  NMR ( $\text{CDCl}_3$ , 300 MHz)  $\delta$  8.19 (bs, 2H), 7.84 (dd,  $J = 8.0, 1.6$  Hz, 1H), 7.47 (td,  $J = 7.6, 1.6$  Hz, 1H), 7.25–7.21 (m, 2H).

#### 4. General procedure for the preparation of synthesis of coumarin-fused azepines (4)

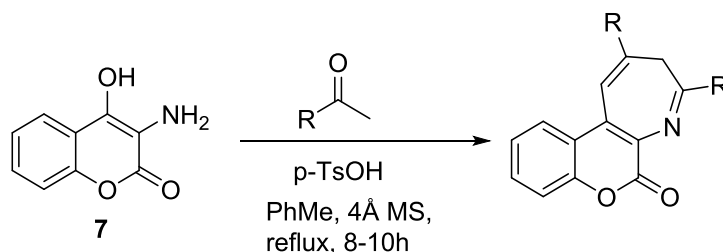

To a 100 mL round bottom flask was charged with 3-amino-4-hydroxycoumarin (1.0 equiv.), acetophenone derivative (2.1 equiv.), *p*-TsOH (0.2 equiv.), and 4 Å molecular sieves in anhydrous toluene (25 mL). The resulting mixture was refluxed for about 8-10 h. The dark solution was allowed to attain to the room temperature and the solvent was evaporated *in vacuo*. The residue was redissolved in DCM (50 mL), filtered, and washed with copious amounts of DCM. The resulting solvent was concentrated *in vacuo* and the product was subjected to flash column chromatography to afford the coumarin-fused azepine derivative.

**4a.** off-yellow solid; yield 80%;  $R_f = 0.42$  (30% EtOAc/hexanes); mp 220–221 °C; <sup>1</sup>H NMR (CDCl<sub>3</sub>, 400 MHz) δ 7.89 (dd, *J* = 8.0, 1.2 Hz, 2H), 7.83 (dd, *J* = 8.0, 1.2 Hz, 1H), 7.62–7.60 (m, 2H), 7.50–7.40 (m, 5H), 7.38 (s, 1H), 7.39–7.35 (m, 1H), 7.33–7.29 (m, 3H), 5.01 (bs, 1H), 2.18 (bs, 1H); <sup>13</sup>C NMR (CDCl<sub>3</sub>, 150 MHz) δ 159.9, 152.0, 150.2, 138.4, 137.7, 136.0, 132.4, 131.1, 131.0, 129.8, 129.4, 129.1, 128.7, 128.5, 127.9, 124.4, 124.2, 119.7, 119.2, 117.2, 36.9; IR  $\nu_{max}$  (ATR) 3427, 3062, 1721, 1602, 1446, 1280, 1186, 1067, 765, 690 cm<sup>-1</sup>; HRMS (EI) calcd for C<sub>25</sub>H<sub>17</sub>NO<sub>2</sub> [M<sup>+</sup>] 363.1259 found 363.1252.

**4b.** yellow solid; yield 63%;  $R_f = 0.34$  (40% EtOAc/hexanes); mp 184–186 °C; <sup>1</sup>H NMR (CDCl<sub>3</sub>, 400 MHz) δ 7.90 (d, *J* = 8.8 Hz, 2H), 7.84 (dd, *J* = 8.8, 1.2 Hz, 1H), 7.59 (d, *J* = 8.8 Hz, 2H), 7.48 (td, *J* = 8.8, 1.2 Hz, 1H), 7.42 (dd, *J* = 8.0, 1.2 Hz, 1H), 7.34–7.29 (m, 1H), 7.36 (s, 1H), 6.99 (d, *J* = 8.8 Hz, 2H), 6.83 (d, *J* = 9.2 Hz, 2H), 4.97 (bs, 1H), 3.89 (s, 3H), 3.81 (s, 3H), 2.09 (s, 1H); <sup>13</sup>C NMR (CDCl<sub>3</sub>, 150 MHz) δ 161.8, 160.1, 160.2, 150.9, 150.0, 137.1, 132.0, 130.8, 130.1, 130.5, 129.4, 129.3, 128.6, 124.3, 124.0, 120.0, 117.5, 117.1, 114.3, 113.8, 55.3, 55.3, 36.6; IR  $\nu_{max}$  (ATR) 3422, 3069, 1721, 1604, 1510, 1282, 1251, 1174, 1072, 832 cm<sup>-1</sup>; HRMS (EI) calcd for C<sub>27</sub>H<sub>21</sub>NO<sub>4</sub> [M<sup>+</sup>] 423.1471 found 423.1468.

**4c.** light yellow solid; yield 71%;  $R_f = 0.34$  (20% EtOAc/hexanes); mp 158–160 °C; <sup>1</sup>H NMR (CDCl<sub>3</sub>, 400 MHz) δ 8.04 (dd, *J* = 6.8, 1.6 Hz, 2H), 7.89 (dd, *J* = 8.0, 0.8 Hz, 1H), 7.76 (d, *J* = 8.8 Hz, 1H), 7.73 (d, *J* = 8.8 Hz, 1H), 7.77–7.72 (m, 1H), 7.68 (d, *J* = 7.2 Hz, 2H), 7.59 (d, *J* = 8.4 Hz, 4H), 7.53 (dd, *J* = 6.8, 1.6 Hz, 2H), 7.51 (dd, *J* = 6.8, 1.6 Hz, 2H), 7.48 (s, 1H), 7.46–7.45 (m, 2H), 7.43 (d, *J* = 7.6 Hz, 2H), 7.38–7.32 (m, 2H), 5.11 (bs, 1H), 2.25 (bs, 1H); <sup>13</sup>C NMR (CDCl<sub>3</sub>, 150 MHz) δ 159.9, 151.5, 150.2, 143.5, 142.1, 139.8, 137.1, 137.1, 134.8, 132.4, 131.1, 129.8, 129.2, 128.9, 128.8, 128.4, 127.9, 127.6, 127.2, 127.02, 126.98, 124.4, 124.2,

119.7, 119.1, 117.2, 36.6; IR  $\nu_{max}$  (ATR) 3361, 3027, 1723, 1575, 1365, 1217, 1109, 934, 840  $\text{cm}^{-1}$ ; HRMS (EI) calcd for  $\text{C}_{37}\text{H}_{25}\text{NO}_2$  [ $\text{M}^+$ ] 515.1885 found 515.1882.

**4d.** white solid; yield 61%;  $R_f = 0.28$  (20% EtOAc/hexanes); mp 256–258 °C;  $^1\text{H}$  NMR ( $\text{CDCl}_3$ , 400 MHz)  $\delta$  7.82 (dd,  $J = 8.0, 1.2$  Hz, 1H), 7.76 (d,  $J = 8.4$  Hz, 2H), 7.62 (d,  $J = 8.8$  Hz, 2H), 7.53 (dd,  $J = 8.0, 1.2$  Hz, 1H), 7.49 (d,  $J = 8.8$  Hz, 2H), 7.48 (d,  $J = 8.8$  Hz, 2H), 7.44 (dd,  $J = 8.0, 0.8$  Hz, 1H), 7.38 (s, 1H), 7.34 (td,  $J = 8.0, 1.2$  Hz, 1H) 4.86 (bs, 1H), 2.19 (bs, 1H);  $^{13}\text{C}$  NMR ( $\text{CDCl}_3$ , 150 MHz)  $\delta$  159.6, 150.5, 150.3, 137.1, 136.1, 134.6, 132.4, 132.4, 131.9, 131.1, 130.1, 130.1, 129.4, 126.1, 124.6, 124.2, 124.1, 119.6, 119.4, 117.3, 36.5; IR  $\nu_{max}$  (ATR) 3429, 3073, 1726, 1557, 1490, 1281, 1113, 1071, 1006, 748  $\text{cm}^{-1}$ ; HRMS (EI) calcd for  $\text{C}_{25}\text{H}_{15}\text{Br}_2\text{NO}_2$  [ $\text{M}^+$ ] 518.9470 found 518.9473.

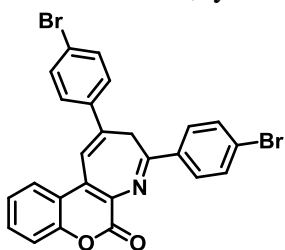

**4e.** yellow solid; yield 62%;  $R_f = 0.32$  (40% EtOAc/hexanes); mp 232–234 °C;  $^1\text{H}$  NMR ( $\text{CDCl}_3$ , 400 MHz)  $\delta$  8.37 (d,  $J = 8.8$  Hz, 2H), 8.21 (d,  $J = 8.0$  Hz, 2H), 8.04 (d,  $J = 8.8$  Hz, 2H), 7.84 (d,  $J = 7.6$  Hz, 1H), 7.79 (d,  $J = 8.8$  Hz, 2H), 7.56 (td,  $J = 8.4, 1.2$  Hz, 1H), 7.53 (s, 1H), 7.48 (d,  $J = 7.6$  Hz, 1H), 7.38 (td,  $J = 8.0, 0.8$  Hz, 1H) 4.94 (bs, 1H), 2.38 (bs, 1H);  $^{13}\text{C}$  NMR ( $\text{CDCl}_3$ , 150 MHz)  $\delta$  159.0, 150.5, 149.5, 149.2, 148.3, 143.9, 141.0, 134.6, 133.1, 131.5, 130.9, 129.5, 128.7, 124.9, 124.6, 124.3, 124.0, 122.2, 118.8, 117.6, 36.6; IR  $\nu_{max}$  (ATR) 3339, 3081, 1730, 1594, 1513, 1342, 1282, 1108, 1074, 848  $\text{cm}^{-1}$ ; HRMS (EI) calcd for  $\text{C}_{25}\text{H}_{15}\text{N}_3\text{O}_6$  [ $\text{M}^+$ ] 453.0961 found 453.0965.

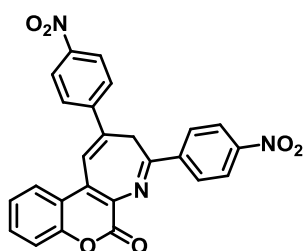

**4f.** brown solid; yield 69%;  $R_f = 0.42$  (20% EtOAc/hexanes); mp 278–280 °C;  $^1\text{H}$  NMR ( $\text{CDCl}_3$ , 400 MHz)  $\delta$  7.97 (dd,  $J = 6.8, 2.0$  Hz, 2H), 7.82 (dd,  $J = 8.0, 1.2$  Hz, 1H), 7.80 (dd,  $J = 8.8, 1.6$  Hz, 2H), 7.72 (dd,  $J = 6.8, 1.6$  Hz, 2H), 7.55 (dd,  $J = 6.8, 1.6$  Hz, 2H), 7.55 (td,  $J = 7.2, 0.8$  Hz, 1H), 7.47 (s, 1H), 7.47 (dd,  $J = 7.2, 0.8$  Hz, 1H), 7.37 (td,  $J = 8.0, 1.2$  Hz, 1H), 4.89 (bs, 1H), 2.35 (bs, 1H);  $^{13}\text{C}$  NMR ( $\text{CDCl}_3$ , 150 MHz)  $\delta$  159.1, 150.4, 149.8, 142.1, 139.4, 135.0, 133.0, 132.9, 132.5, 131.4, 130.8, 129.0, 128.4, 124.8, 124.3, 121.7, 118.9, 118.0, 117.5, 114.6, 113.4, 36.2; IR  $\nu_{max}$  (ATR) 3506, 3039, 2226, 1715, 1604, 1500, 1373, 1217, 1108, 1678, 837  $\text{cm}^{-1}$ ; HRMS (EI) calcd for  $\text{C}_{27}\text{H}_{15}\text{N}_3\text{O}_2$  [ $\text{M}^+$ ] 413.1164 found 413.1169.

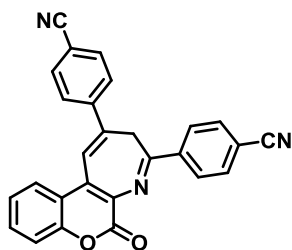

**4g.** orange solid; yield 28%;  $R_f = 0.22$  (40% EtOAc/hexanes); mp 286–288 °C;  $^1\text{H}$  NMR ( $\text{CDCl}_3$ , 400 MHz)  $\delta$  7.90 (d,  $J = 9.2$  Hz, 2H), 7.84 (d,  $J = 8.0$  Hz, 1H), 7.58 (d,  $J = 8.8$  Hz, 2H), 7.44–7.39 (m, 2H), 7.31–7.30 (m, 2H), 6.75 (s, 2H), 6.58 (d,  $J = 9.2$  Hz, 2H), 5.0 (bs, 1H), 3.06 (s, 6H), 2.99 (s, 6H), 2.03 (bs, 1H);  $^{13}\text{C}$  NMR ( $\text{CDCl}_3$ , 150 MHz)  $\delta$  160.8, 151.9, 151.4, 150.9, 150.0, 137.8, 131.7, 130.4, 129.2, 128.9, 126.0, 124.1, 123.9, 123.8, 120.6, 117.0, 115.7, 112.0, 111.2, 40.2, 40.0, 36.0; IR  $\nu_{max}$  (ATR) 3388, 2923, 1724, 1603, 1524, 1366, 1137, 1074, 945, 895  $\text{cm}^{-1}$ ; HRMS (EI) calcd for  $\text{C}_{29}\text{H}_{27}\text{N}_3\text{O}_2$  [ $\text{M}^+$ ] 449.2103 found 449.2101.

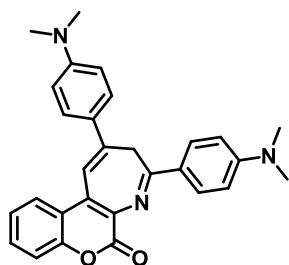

**4h.** light green solid; yield 20%;  $R_f = 0.45$  (30% EtOAc/hexanes); mp 148–150 °C;  $^1\text{H NMR}$  ( $\text{CDCl}_3$ , 400 MHz)  $\delta$  7.90 (s, 1H), 7.89 (s, 1H), 7.83 (d,  $J = 8.4$  Hz, 1H), 7.60 (s, 1H), 7.58 (s, 1H), 7.46 (td,  $J = 8.0, 1.2$  Hz, 1H), 7.41 (dd,  $J = 8.4, 1.6$  Hz, 1H), 7.32–7.30 (m, 2H), 6.97 (s, 1H), 6.94 (s, 1H), 6.80 (s, 1H), 6.77 (s, 1H), 4.98 (bs, 1H), 3.90 (t,  $J = 4.8$  Hz, 4H), 3.84 (t,  $J = 4.8$  Hz, 4H), 3.28 (t,  $J = 4.8$  Hz, 4H), 3.23 (t,  $J = 4.8$  Hz, 4H), 2.04 (bs, 1H);  $^{13}\text{C NMR}$  ( $\text{CDCl}_3$ , 150 MHz)  $\delta$  160.5, 159.9, 152.7, 151.7, 151.0, 150.1, 137.2, 132.0, 130.7, 130.3, 129.3, 129.2, 126.8, 124.2, 124.0, 120.3, 117.2, 117.0, 114.9, 113.9, 66.7, 66.6, 48.3, 47.8, 36.1; IR  $\nu_{\text{max}}$  (ATR) 3073, 1726, 1579, 1557, 1491, 1281, 1111, 1071, 1006, 749  $\text{cm}^{-1}$ ; HRMS (EI) calcd for  $\text{C}_{33}\text{H}_{31}\text{N}_3\text{O}_4$  [ $\text{M}^+$ ] 533.2315 found 533.2310.

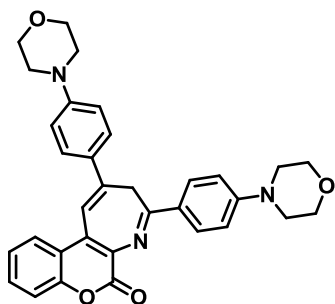

**4i.** brown solid; yield 43%;  $R_f = 0.15$  (20% EtOAc/hexanes); mp 188–190 °C;  $^1\text{H NMR}$  ( $\text{CDCl}_3$ , 400 MHz)  $\delta$  12.14 (s, 1H), 8.86 (d,  $J = 6.0$  Hz, 2H), 8.82 (d,  $J = 5.2$  Hz, 2H), 8.55 (dd,  $J = 8.0, 1.6$  Hz, 1H), 8.24 (d,  $J = 1.6$  Hz, 1H), 8.22 (d,  $J = 1.6$  Hz, 1H), 8.03 (dd,  $J = 4.4, 1.6$  Hz, 2H), 7.69 (dd,  $J = 4.8, 1.6$  Hz, 2H), 7.60 (td,  $J = 7.2, 1.2$  Hz, 1H), 7.14 (d,  $J = 8.8$  Hz, 1H), 6.98 (td,  $J = 8.4, 1.2$  Hz, 1H);  $^{13}\text{C NMR}$  ( $\text{CDCl}_3$ , 150 MHz)  $\delta$  196.8, 164.1, 156.6, 154.4, 150.9, 150.7, 148.7, 144.9, 144.6, 137.1, 134.3, 122.3, 121.5, 121.1, 120.4, 118.9, 118.5; IR  $\nu_{\text{max}}$  (ATR) 3049, 1628, 1587, 1482, 1352, 1238, 1151, 970, 807  $\text{cm}^{-1}$ ; HRMS (EI) calcd for  $\text{C}_{23}\text{H}_{15}\text{N}_3\text{O}_2$  [ $\text{M}^+$ ] 365.1164 found 365.1160.

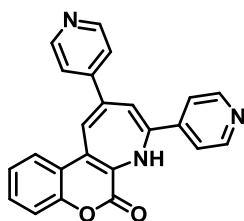

**4j.** grey solid; yield 49%;  $R_f = 0.34$  (20% EtOAc/hexanes); mp 243–245 °C;  $^1\text{H NMR}$  ( $\text{CDCl}_3$ , 400 MHz)  $\delta$  7.89 (dd,  $J = 6.4, 1.6$  Hz, 1H), 7.61 (s, 1H), 7.60 (d,  $J = 0.8$  Hz, 1H), 7.52 (dd,  $J = 6.4, 1.6$  Hz, 1H), 7.49 (dd,  $J = 8.0, 1.2$  Hz, 1H), 7.41 (dd,  $J = 8.4, 1.2$  Hz, 1H), 7.35 (td,  $J = 8.4, 1.6$  Hz, 1H), 7.21 (d,  $J = 3.2$  Hz, 1H), 6.93 (d,  $J = 3.2$  Hz, 1H), 6.55 (ddd,  $J = 5.2, 3.5, 2.0$  Hz, 2H);  $^{13}\text{C NMR}$  ( $\text{CDCl}_3$ , 150 MHz)  $\delta$  159.8, 152.2, 151.3, 150.2, 146.2, 144.6, 143.2, 132.4, 131.4, 129.9, 125.8, 124.4, 124.3, 119.7, 117.2, 115.7, 115.0, 112.7, 112.4, 111.4, 33.8; IR  $\nu_{\text{max}}$  (ATR) 3423, 3132, 1718, 1596, 1474, 1786, 1172, 1109, 1023, 880  $\text{cm}^{-1}$ ; HRMS (EI) calcd for  $\text{C}_{21}\text{H}_{13}\text{NO}_4$  [ $\text{M}^+$ ] 343.0845 found 343.0841.

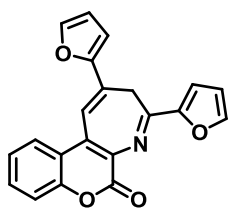

**4k.** yellow solid; yield 54%;  $R_f = 0.40$  (20% EtOAc/hexanes); mp 232–234 °C;  $^1\text{H NMR}$  ( $\text{CDCl}_3$ , 400 MHz)  $\delta$  7.78 (dd,  $J = 8.0, 0.8$  Hz, 1H), 7.47 (td,  $J = 8.4, 1.2$  Hz, 1H), 7.41 (dd,  $J = 8.2, 1.2$  Hz, 1H), 7.29 (td,  $J = 8.0, 1.2$  Hz, 1H), 7.26–7.23 (m, 2H), 7.22–7.18 (m, 3H), 7.15 (s, 1H), 7.16–7.12 (m, 1H), 7.07–7.04 (m, 2H), 4.46 (bs, 1H), 2.52 (s, 3H), 2.44 (bs, 1H), 2.35 (s, 3H);  $^{13}\text{C NMR}$  ( $\text{CDCl}_3$ , 150 MHz)  $\delta$  159.6, 150.2, 146.7, 142.7, 142.6, 132.7, 132.1, 131.1, 130.3, 129.9, 129.8, 128.5, 128.2, 127.8, 127.3, 124.4, 124.2, 119.6, 117.2, 116.8, 37.7; IR  $\nu_{\text{max}}$  (ATR) 3099, 1706, 1567, 1498, 1425, 1288, 1181, 1109, 1077, 852, 747  $\text{cm}^{-1}$ ; HRMS (EI) calcd for  $\text{C}_{21}\text{H}_{13}\text{NO}_2\text{S}_2$  [ $\text{M}^+$ ] 375.0388 found 375.0385.

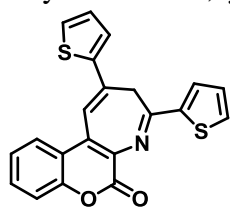

**4l.** off-white solid; yield 37%;  $R_f = 0.39$  (20% EtOAc/hexanes); mp 216–218 °C;  $^1\text{H NMR}$  ( $\text{CDCl}_3$ , 400 MHz)  $\delta$  7.78 (dd,  $J = 0.8, 8.0$  Hz, 1H), 7.47 (td,  $J = 8.4, 1.2$  Hz, 1H), 7.41 (dd,  $J = 8.0, 0.8$  Hz, 1H), 7.30 (td,  $J = 8.0, 1.2$  Hz, 1H), 7.27–7.26 (m, 2H), 7.24–7.18 (m, 3H), 7.16–7.12 (m, 1H), 7.16 (s, 1H), 7.07–7.03 (m, 2H), 4.46 (br s, 1H), 2.52 (s, 3H), 2.44 (br s, 1H), 2.35 (s, 3H);  $^{13}\text{C NMR}$  ( $\text{CDCl}_3$ , 150 MHz)  $\delta$  159.7, 154.4, 150.3, 140.3, 139.2, 138.3, 137.3, 135.9, 132.1, 131.3, 130.8, 130.1, 129.9, 129.7, 129.2, 128.9, 128.7, 126.2, 125.5, 124.4, 124.2, 121.4, 119.6, 117.2, 43.7, 21.6, 20.5; IR  $\nu_{\text{max}}$  (ATR) 3061, 1723, 1378, 1174, 1069, 937, 766  $\text{cm}^{-1}$ ; HRMS (EI) calcd for  $\text{C}_{27}\text{H}_{21}\text{NO}_2$  [ $\text{M}^+$ ] 391.1572 found 391.1577.

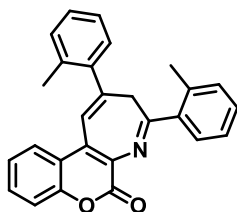

**4m.** yellow solid; yield 33%;  $R_f = 0.26$  (30% EtOAc/hexanes); mp 239–241 °C;  $^1\text{H NMR}$  ( $\text{CDCl}_3$ , 400 MHz)  $\delta$  7.83 (dd,  $J = 8.0, 0.8$  Hz, 1H), 7.75 (dd,  $J = 7.6, 1.6$  Hz, 1H), 7.48 (td,  $J = 8.4, 1.2$  Hz, 1H), 7.41 (dd,  $J = 8.0, 1.2$  Hz, 1H), 7.36 (dd,  $J = 1.6, 8.8$  Hz, 1H), 7.33 (dd,  $J = 1.6, 6.0$  Hz, 1H), 7.31 (dd,  $J = 5.6, 2.0$  Hz, 1H), 7.23 (s, 1H), 7.22 (dd,  $J = 7.6, 1.6$  Hz, 1H), 6.98–6.93 (m, 2H), 6.95 (s, 1H), 6.82 (d,  $J = 8.4$  Hz, 1H), 4.88 (br s, 1H), 3.7 (s, 3H), 3.1 (s, 3H), 2.39 (br s, 1H);  $^{13}\text{C NMR}$  ( $\text{CDCl}_3$ , 150 MHz)  $\delta$  160.1, 158.0, 157.6, 157.5, 150.4, 140.3, 132.7, 132.0, 131.5, 131.1, 130.9, 130.6, 129.9, 129.7, 127.9, 124.3, 124.2, 121.4, 120.6, 120.5, 119.8, 117.1, 111.0, 110.8, 55.3, 54.6, 41.3; IR  $\nu_{\text{max}}$  (ATR) 3064, 2941, 1721, 1597, 1487, 1373, 1289, 1170, 1073, 749  $\text{cm}^{-1}$ ; HRMS (EI) calcd for  $\text{C}_{27}\text{H}_{21}\text{NO}_4$  [ $\text{M}^+$ ] 423.1471 found 423.1474.

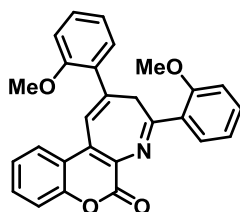

**4n.** off-white; yield 30%;  $R_f = 0.30$  (40% EtOAc/hexanes); mp 180–182 °C;  $^1\text{H NMR}$  ( $\text{CDCl}_3$ , 400 MHz)  $\delta$  7.84 (dd,  $J = 8.0, 1.2$  Hz, 1H), 7.64 (dd,  $J = 7.6, 1.6$  Hz, 1H), 7.58 (dd,  $J = 8.0, 1.2$  Hz, 1H), 7.52 (dd,  $J = 7.2, 1.6$  Hz, 1H), 7.35 (dd,  $J = 8.4, 1.2$  Hz, 1H), 7.26 (dd,  $J = 8.4, 1.2$  Hz, 1H), 7.25 (s, 1H), 7.24–7.21 (m, 3H), 7.11 (dd,  $J = 7.2, 2.4$  Hz, 1H), 4.66 (br s, 1H), 2.62 (br s, 1H); IR  $\nu_{\text{max}}$  (ATR) 3064, 2941, 1721, 1597, 1487, 1373, 1289, 1170, 1073, 749  $\text{cm}^{-1}$ ; HRMS (EI) calcd for  $\text{C}_{25}\text{H}_{15}\text{Br}_2\text{NO}_2$  [ $\text{M}^+$ ] 518.9470 found 518.9473.

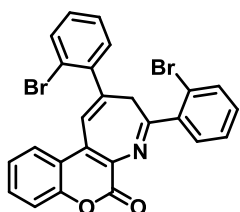

**4o.** off-white solid; yield 57%;  $R_f = 0.42$  (30% EtOAc/hexanes); mp 155–157 °C;  $^1\text{H NMR}$  ( $\text{CDCl}_3$ , 400 MHz)  $\delta$  7.95–7.93 (m, 2H), 7.59 (d,  $J = 8.0$  Hz, 1H), 7.54–7.49 (m, 4H), 7.43 (d,  $J = 1.2$  Hz, 1H), 7.41 (s, 1H), 7.39 (s, 1H), 7.38–7.36 (m, 1H), 7.28–7.26 (m, 1H), 7.25 (d,  $J = 6.8$  Hz, 1H), 7.21 (dd,  $J = 8.0, 1.2$  Hz, 1H), 4.29 (q,  $J = 7.2, 14.8$  Hz, 1H), 1.76 (s, 3H), 1.23 (d,  $J = 7.6$  Hz, 3H);  $^{13}\text{C NMR}$  ( $\text{CDCl}_3$ , 150 MHz)  $\delta$  172.4, 159.4, 152.7, 150.6, 142.3, 139.7, 137.7, 130.7, 130.4, 130.4, 128.8, 128.7, 128.5, 127.8, 127.6, 125.6, 124.5, 124.0, 119.1, 117.3, 37.0, 19.8, 11.7 IR  $\nu_{\text{max}}$  (ATR) 2926, 1721, 1605, 1448, 1302, 1180, 1061, 874, 753  $\text{cm}^{-1}$ ; HRMS (EI) calcd for  $\text{C}_{27}\text{H}_{21}\text{NO}_2$  [ $\text{M}^+$ ] 391.1572 found 391.1576.

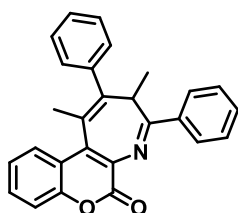

## References

1. N. C. Ganguly, M. Datta, P. De and R. Chakravarty, *Synth. Commun.* 2003, **33**, 647.
2. I. Brady, D. Leane, H. P. Hughes, R. J. Forster and T. E. Keyes, *Dalton Trans.* 2004, **21**, 334.

DYGR046

exp4 stdih

SAMPLE DEC. & VT  
 date Dec 12 2012 dfrq 300.065  
 solvent CDC13 dn H1  
 flie 30 dpwr 30  
 ACQUISITION exp 30  
 sfrq 300.066 dcr min  
 tn H1 dnm C  
 at 3.413 dmf 200  
 np 32768 dseq  
 sw 4800.8 dres 1.0  
 fb 2600 homo  
 bs 57 PROCESSING  
 dpwr 5.5 wtf16  
 d1 1.000 proc ft  
 tof 723.5 math 65536 f  
 nt 16  
 ct 16 werr  
 alock not used n wepp  
 gain n wbs  
 FLAGS n wnt  
 l1 n  
 l2 n  
 dp Y  
 hs nn  
 DISPLAY  
 sp -598.9  
 wp 4800.8  
 vs 30  
 sc 0  
 vc 550  
 hnm 18.20  
 ls 500.00  
 rfl 598.9  
 rfp 0  
 th  
 ins 100.000  
 nm cdc ph 7

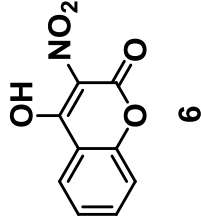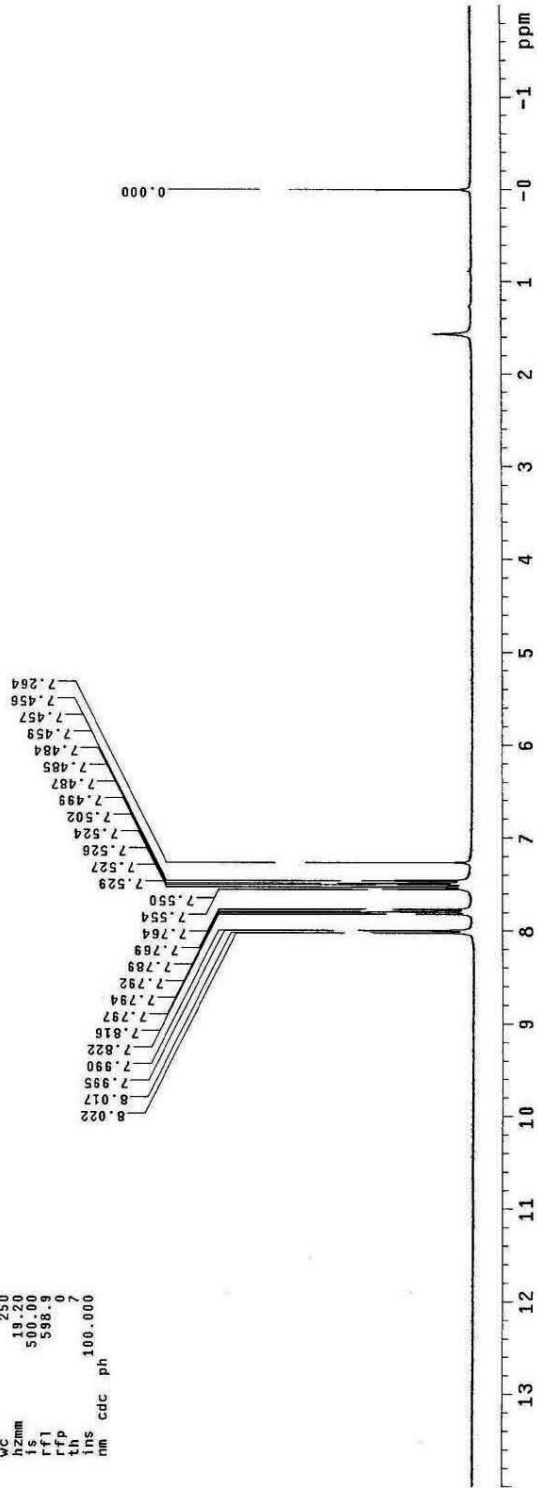



DYYT113

```

NAME          DYYT113
EXPNO         1
PROCNO        1
Date_         20161228
Time_         16.40
INSTRUM       spect
PROBHD        5 mm PABBO BB/
PULPROG       zg30
TD            32768
SOLVENT       DMSO
NS            32
DS            0
SWH           8012.820 Hz
FIDRES       0.244532 Hz
AQ           2.0447731 sec
RG           181.8
DW           62.400 usec
DE           16.68 usec
TE           300.0 K
D1           2.00000000 sec
TD0          1
  
```

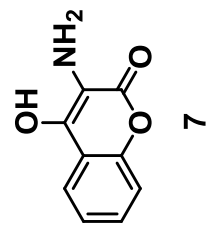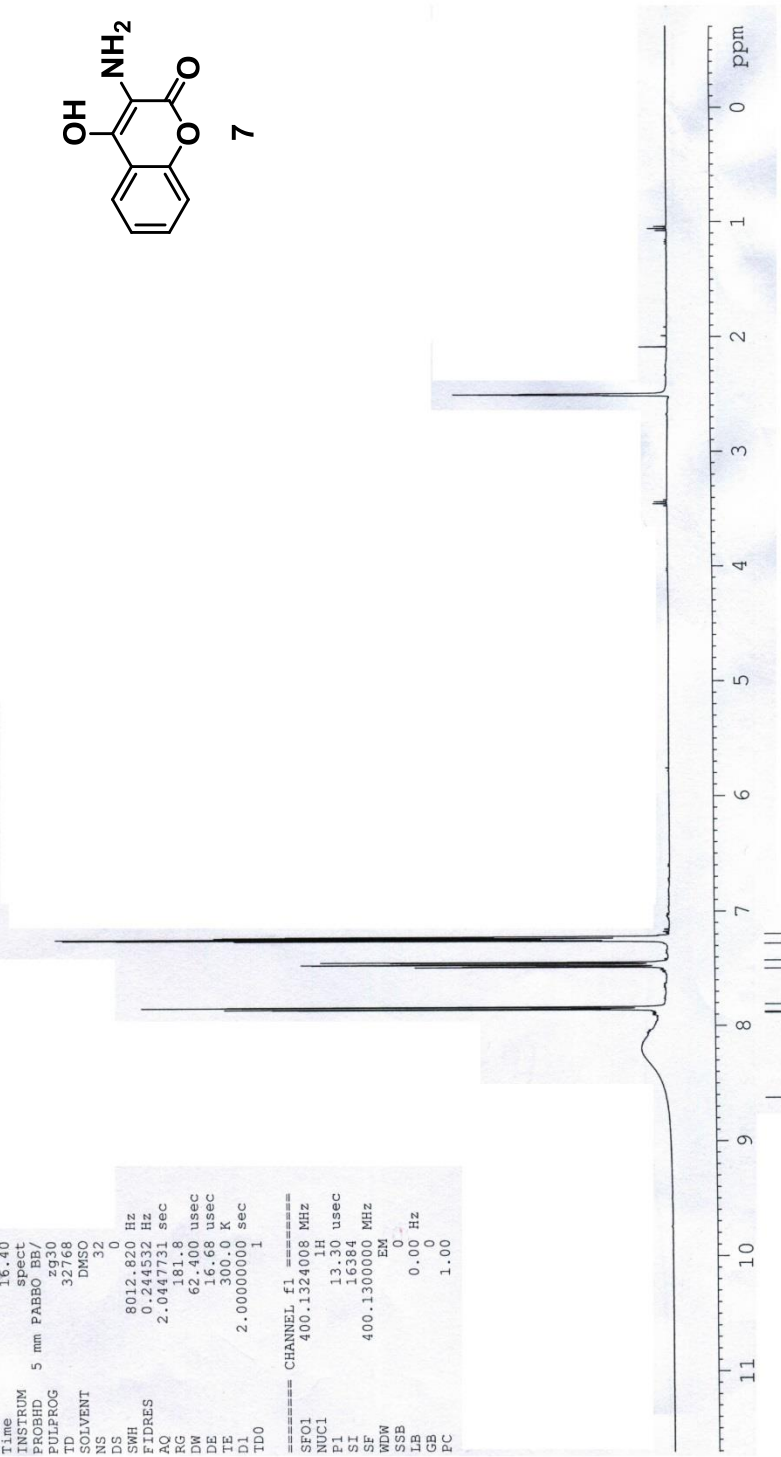

```

===== CHANNEL f1 =====
SF01  400.1324008 MHz
NUC1   1H
P1     13.30 usec
SI     16384
SF     400.1300000 MHz
WDW    EM
SSB    0
LB     0.00 Hz
GB     0
PC     1.00
  
```

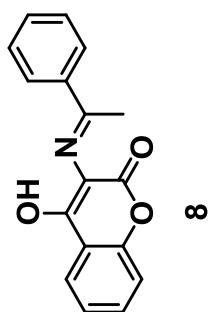

2.753

8.049  
8.046  
8.030  
8.026  
7.587  
7.584  
7.566  
7.549  
7.545  
7.526  
7.507  
7.420  
7.417  
7.399  
7.382  
7.376  
7.355  
7.349  
7.346  
7.329  
7.311  
7.309  
7.284  
7.193  
7.173

BMK-4-554

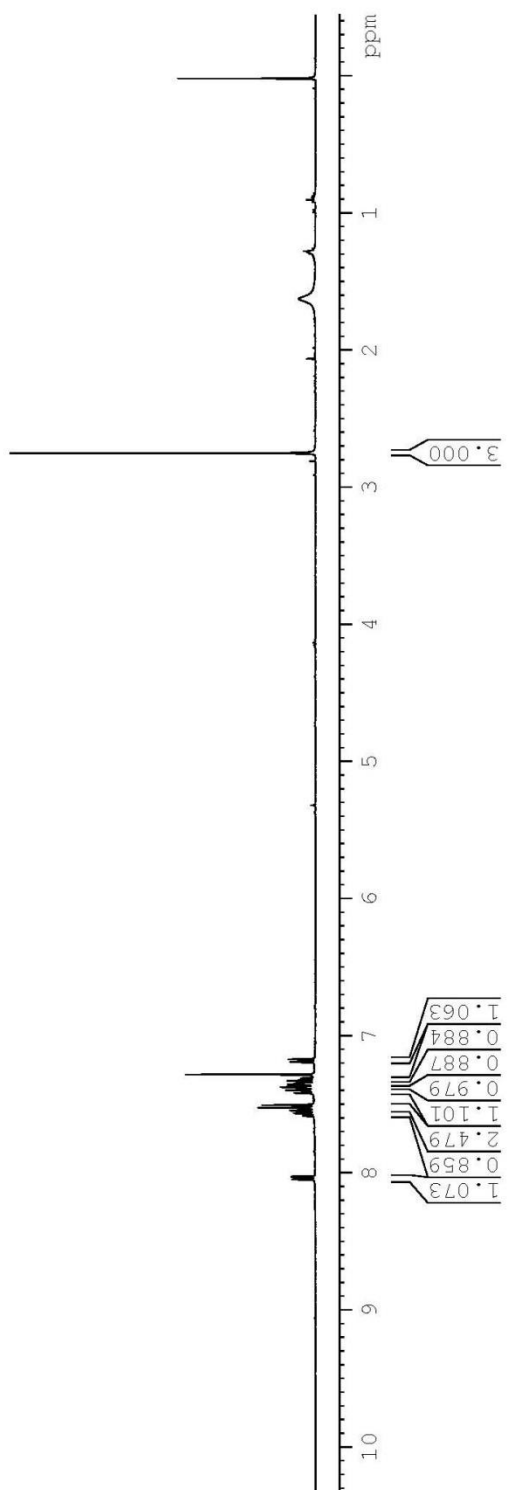

BMK-4-554

8.049  
8.046  
8.030  
8.026

7.587  
7.584  
7.566  
7.549  
7.545  
7.526  
7.507  
7.420  
7.417  
7.399  
7.382  
7.376  
7.355  
7.349  
7.346  
7.329  
7.311  
7.309  
7.284  
7.193  
7.173

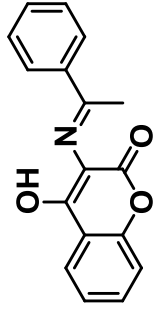

8

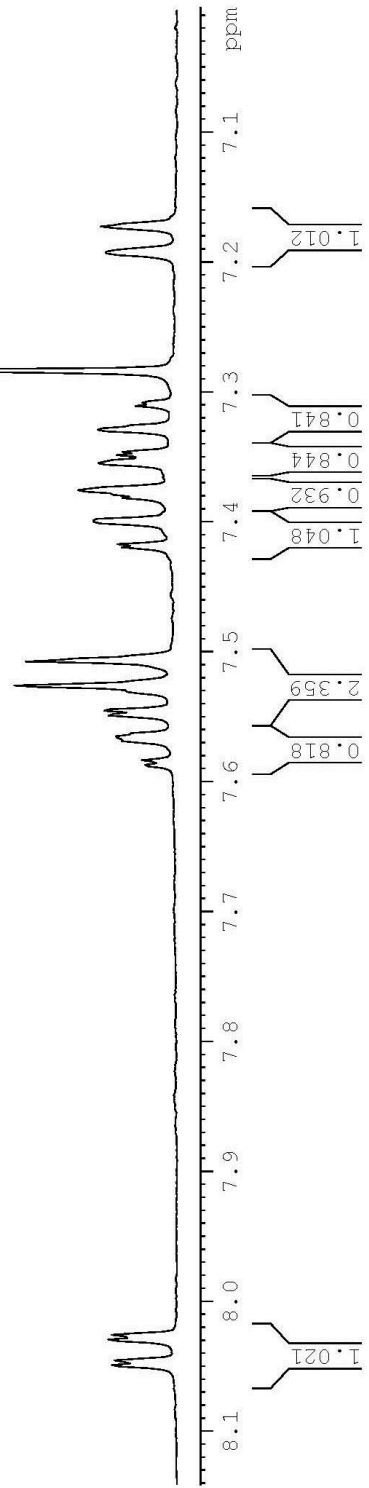

DYYT114  
 7.900  
 7.882  
 7.878  
 7.839  
 7.837  
 7.820  
 7.820  
 7.817  
 7.815  
 7.610  
 7.610  
 7.605  
 7.601  
 7.596  
 7.500  
 7.497  
 7.480  
 7.477  
 7.472  
 7.468  
 7.459  
 7.451  
 7.445  
 7.441  
 7.433  
 7.427  
 7.424  
 7.406  
 7.403  
 7.387  
 7.379  
 7.369  
 7.363  
 7.354  
 7.351  
 7.347  
 7.325  
 7.306  
 7.290  
 7.288  
 5.054  
 4.974  
 2.197  
 2.188  
 2.169

NAME DYYT114  
 EXPNO 1  
 PROCNO 1  
 Date\_ 20170117  
 Time 21.43  
 INSTRUM spect  
 PROBHD 5 mm FAPBO BB/  
 PULPROG zg30  
 TD 32768  
 SOLVENT CDCl3  
 NS 16  
 DS 0  
 SWH 8012.820 Hz  
 FIDRES 0.244532 Hz  
 AQ 2.0447731 sec  
 RG 205.92  
 DW 62.400 usec  
 DE 16.68 usec  
 TE 300.0 K  
 D1 2.00000000 sec  
 TD0 1  
 =====  
 CHANNEL f1 =====  
 SFO1 400.1324008 MHz  
 NUC1 1H  
 P1 13.30 usec  
 SI 16384  
 SF 400.1300100 MHz  
 WDW EM  
 SSB 0  
 LB 0.00 Hz  
 GB 0  
 PC 1.00

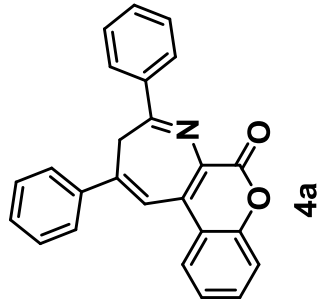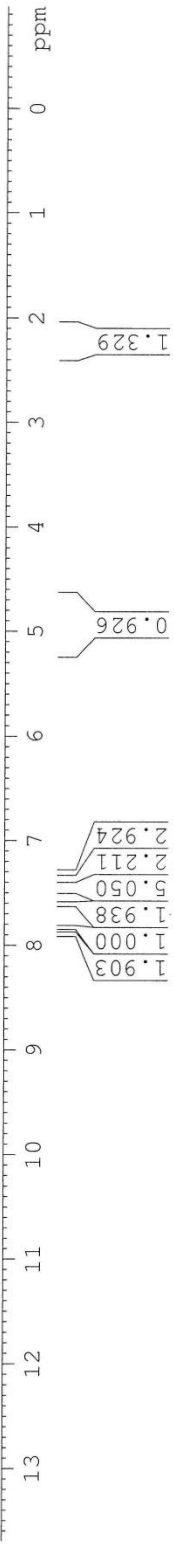

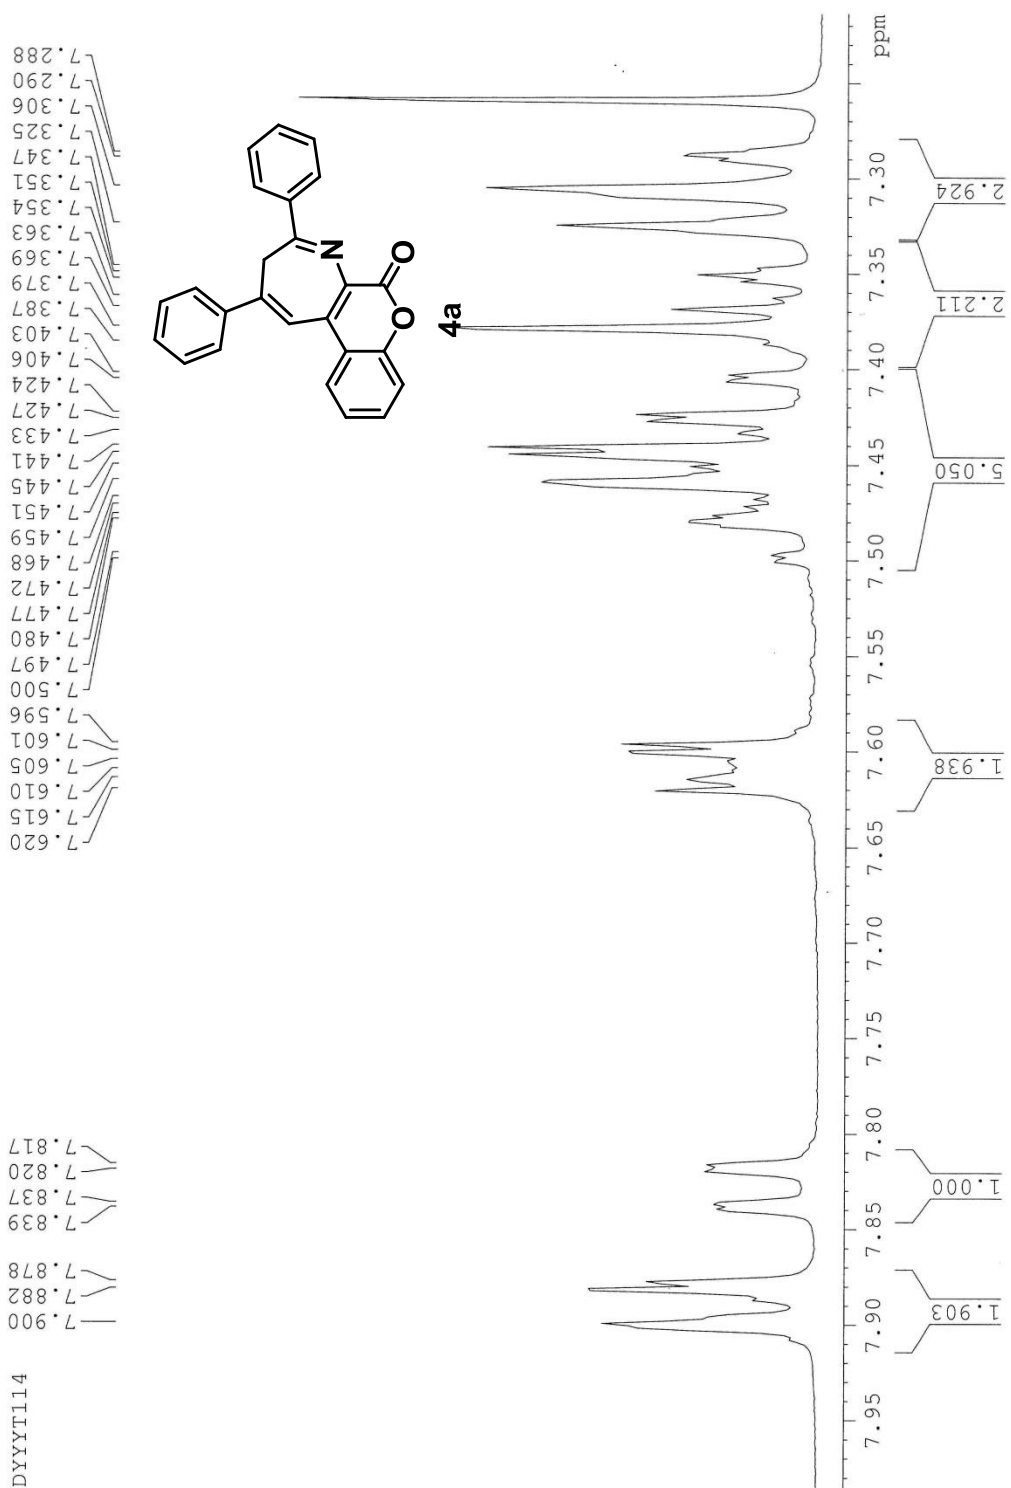

BMK-4-545  
 exp6 CARBON  
 date Jun 7 2017  
 solvent cdc13  
 file exp  
 sw 37878.8  
 at 0.865  
 np 65536  
 fb 17000  
 bs 8  
 dl 2.000  
 nl 30000  
 ct 1  
 tn 36  
 tn 150.869  
 sffrq 2297.1  
 tof 59  
 tpwr 5.125  
 pw DECOUPLER H1  
 dn 0  
 dof 0  
 dm vvy  
 decwave w  
 dprv 44  
 dmf 11696  
 PRESATURATION n  
 satmode n  
 wet SPECIAL  
 temp not used  
 gdn not used  
 hst 0.008  
 pw80 10.250  
 alfa 10.000  
 FLAGS n  
 n v  
 n v  
 n v  
 hs  
 hs  
 lb  
 fn  
 sp  
 w  
 rff  
 rff  
 rp  
 lp  
 wc 268  
 sc 71  
 vs 6  
 th nm  
 cdc ph

159.794  
 151.967  
 150.194  
 138.367  
 137.690  
 135.938  
 132.324  
 131.056  
 130.909  
 129.801  
 129.409  
 129.012  
 128.641  
 128.483  
 127.830  
 124.390  
 124.179  
 119.665  
 119.138  
 117.158

77.211  
 77.000  
 76.787

38.862

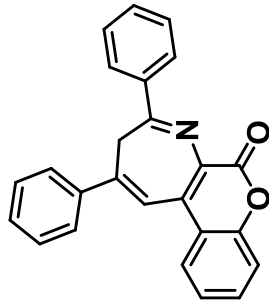

4a

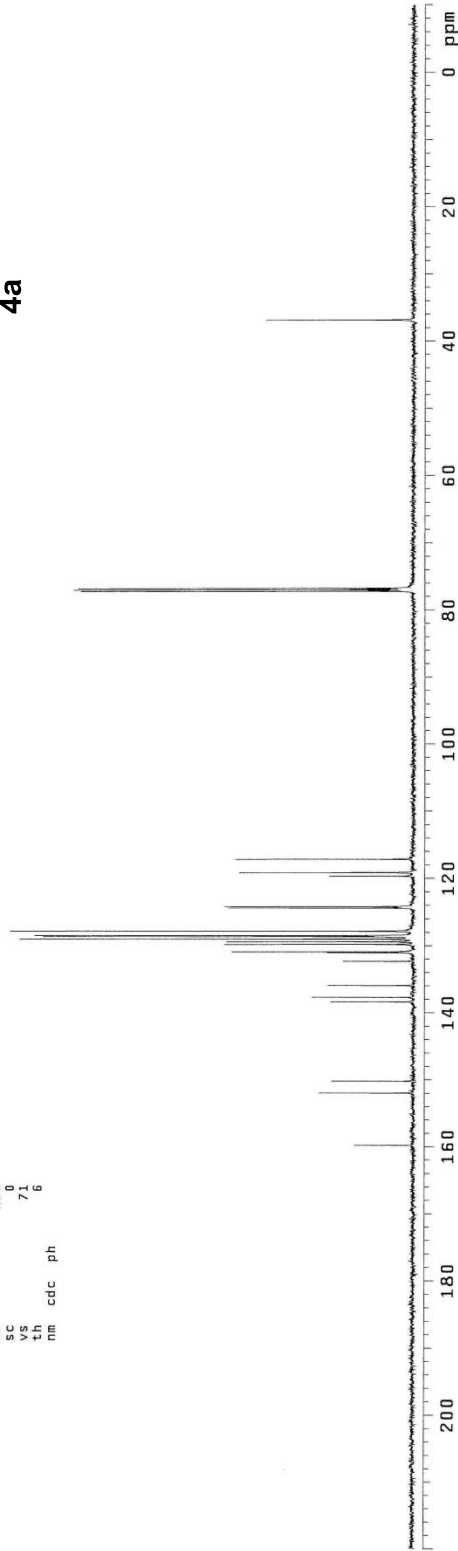

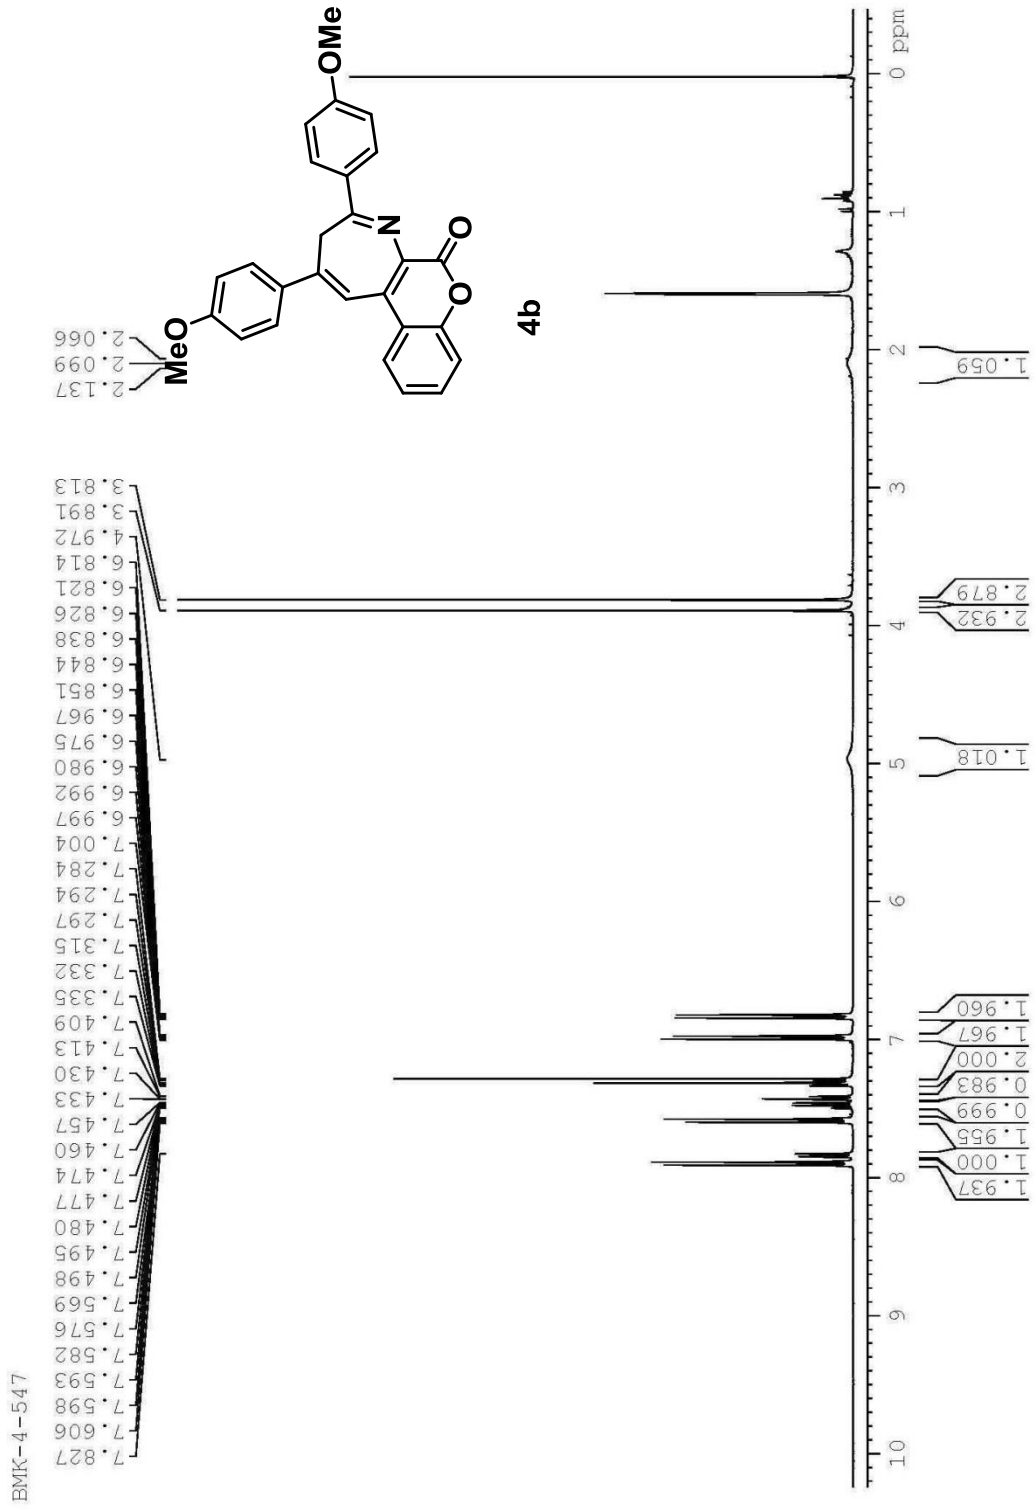

BMK-4-547

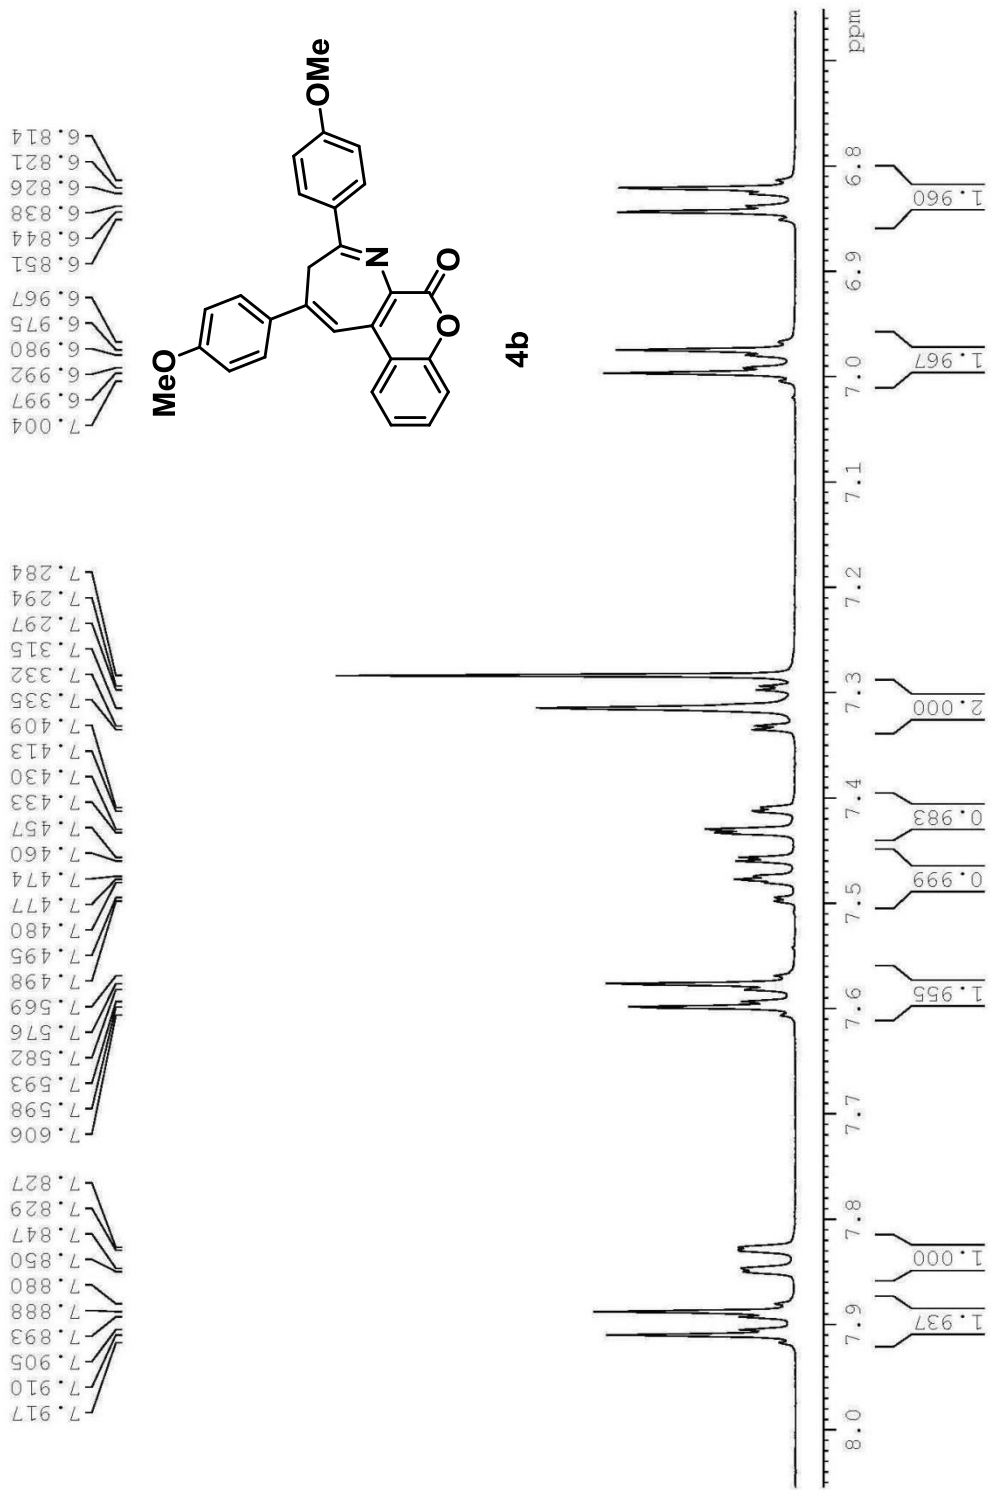



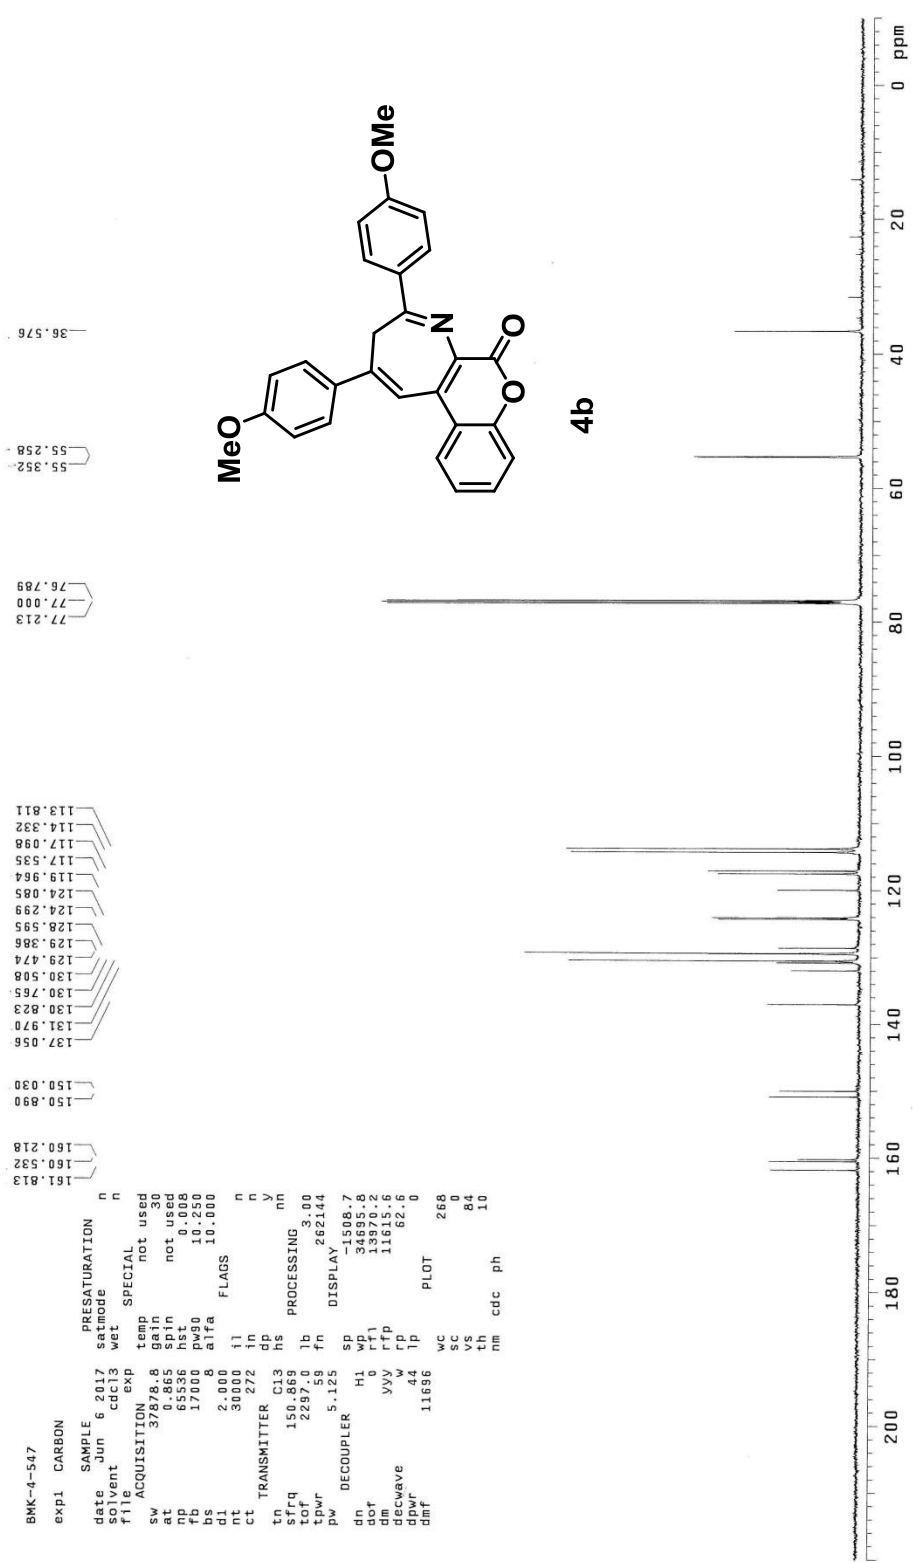

```

BMK-4-547
exp1 CARBON
SAMPLE
date Jun 6 2017
file cdc13
PRESATURATION
wet SPECIAL
temp not used
gain 30
ACQUISITION
at 0.865 spin
np 65536 hst 0.008
fb 17000 pw90 10.250
d3 2.000 alpha
d1 30000 i1
ct 272 in
TRANSMITTER
tn C13
sfrq 150.869
tot 2297.0
tpwr 5.123
DECOUPLER
H1 wp
dn 0 rfl
dm 0 rfp
dncwve 11615.6
dncwve 62.6
dmf 11696 PLOT
wc 268
sc 0
vs 84
th cdc ph 10

```

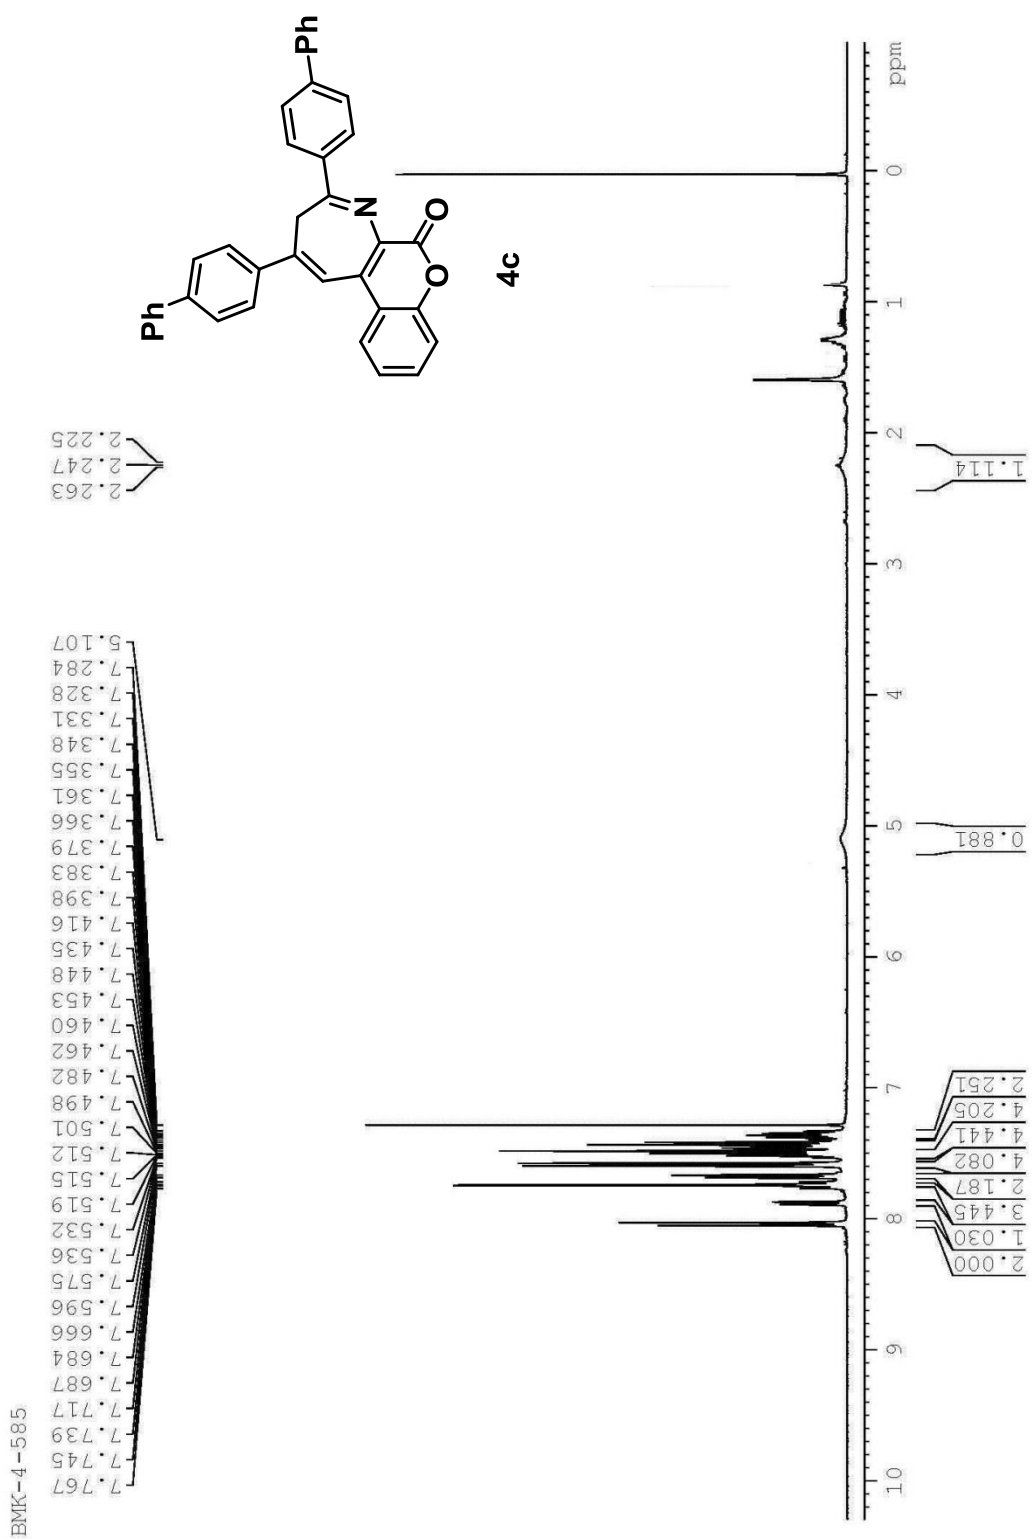

BMK-4-585

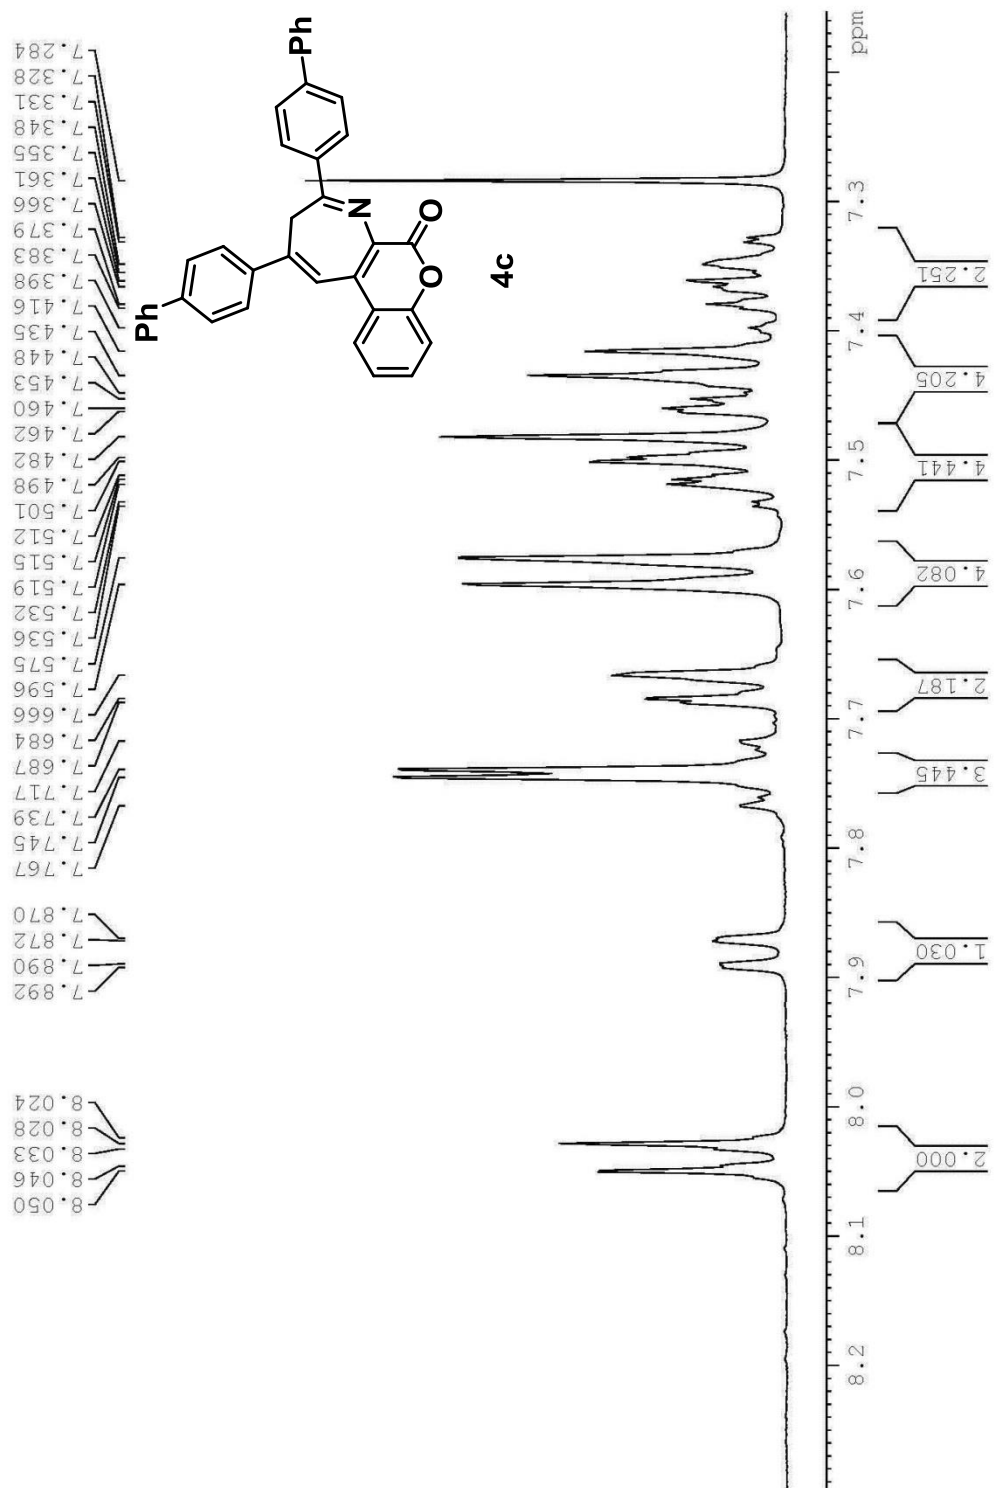

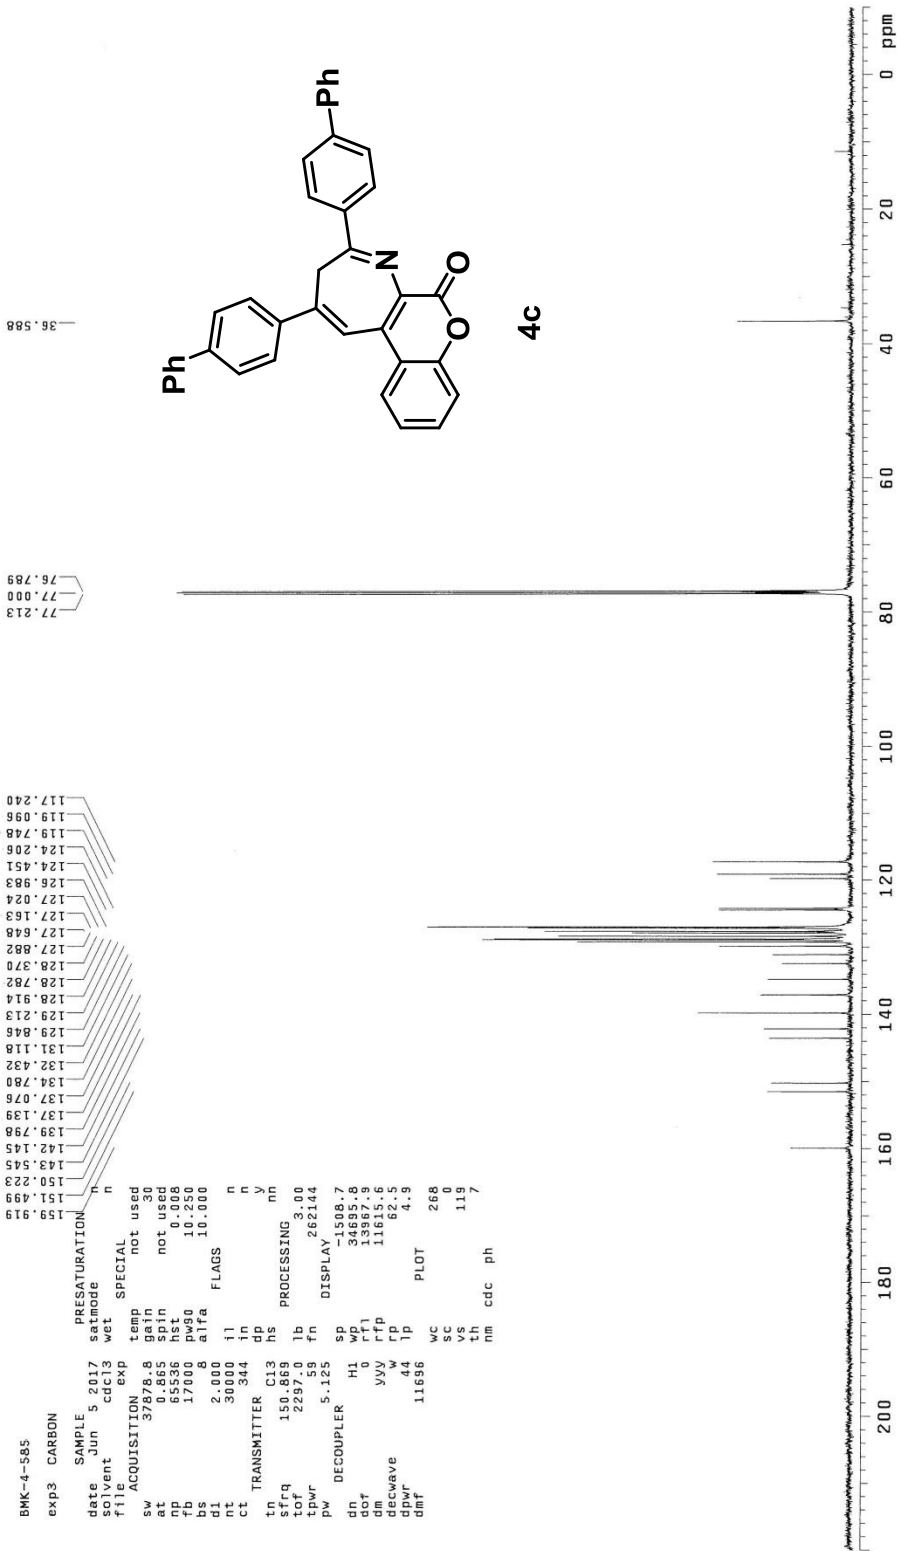

```

exp3 CARBON
SAMPLE Jun 5 2017
solvent cdc13
F1 ACQUISITION exp temp not used
sw 37878.8 gain 30
at 0.865 spin not used
np 65536 hst 0.008
fb 17000 pw90 10.250
bs 2.00 aifa 10.000
fl 30000 il
ct 344 tn n
ct TRANSMITTER dp v
tn C13 hs nn
sfrq 150.869 hs PROCESSING 3.00
tof 2297.0 lb
tpr 5.123 fn DISPLAY 262144
pw DECOUPLER H1 WD -1508.7
dn 0 rfl 34695.8
dm 0 rfp 13967.9
decwave w rp 11615.5
dpr 4.3
dnt 11698 lp PLOT
wc 268
sc 0
vs 119
th cdc ph
nm cdc ph
  
```

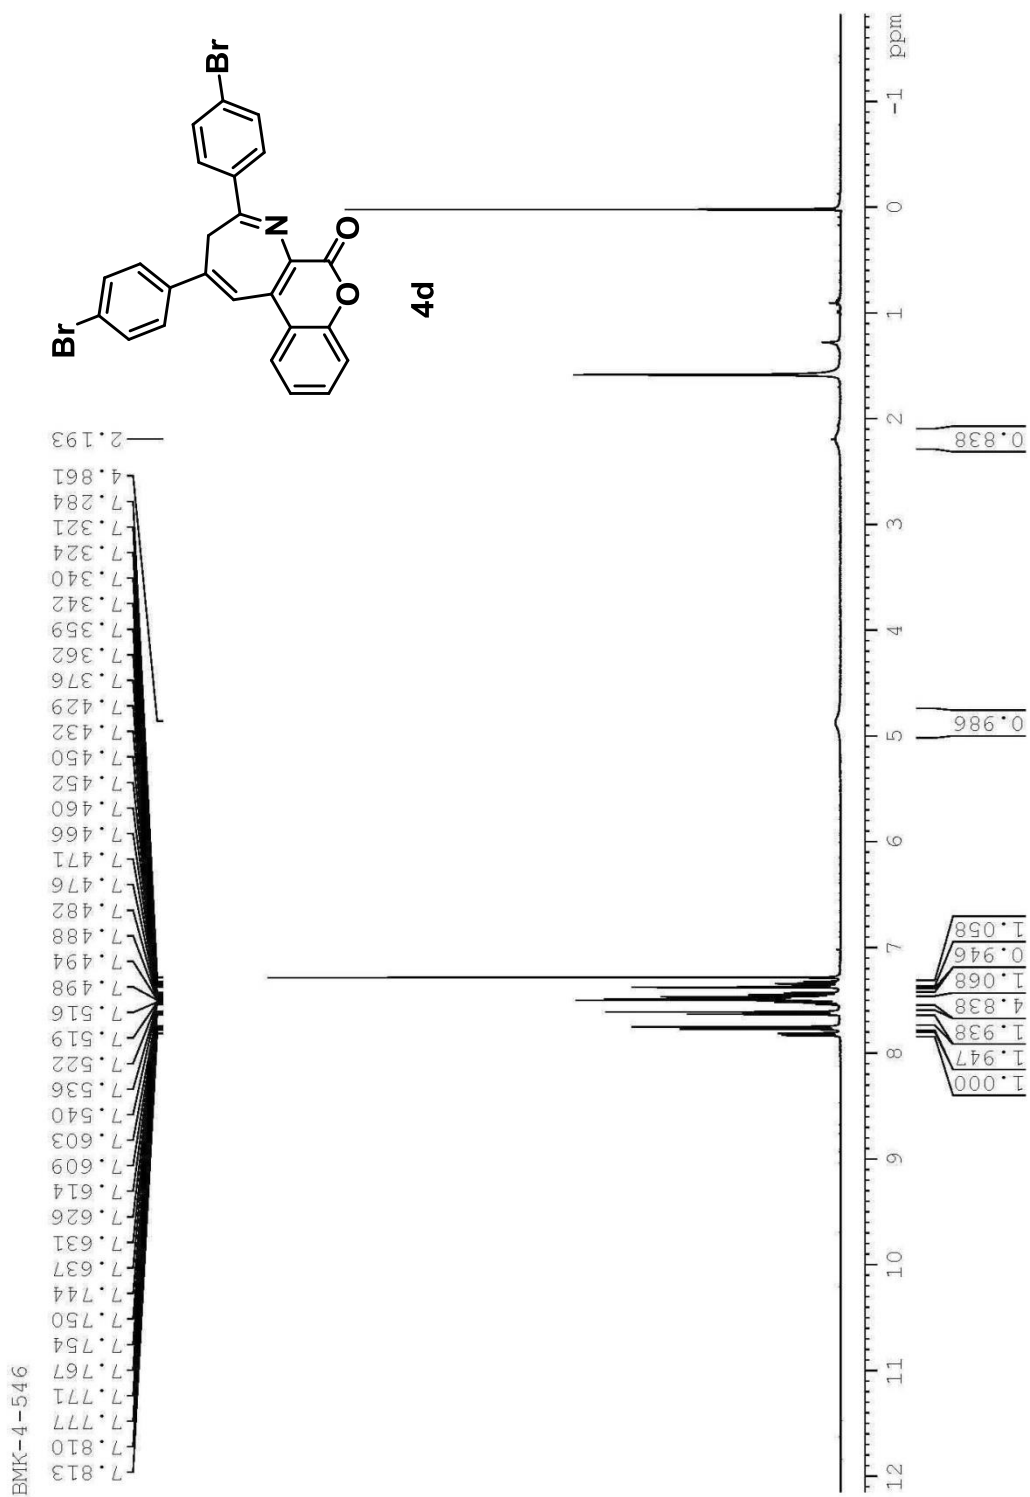

BMK-4-546

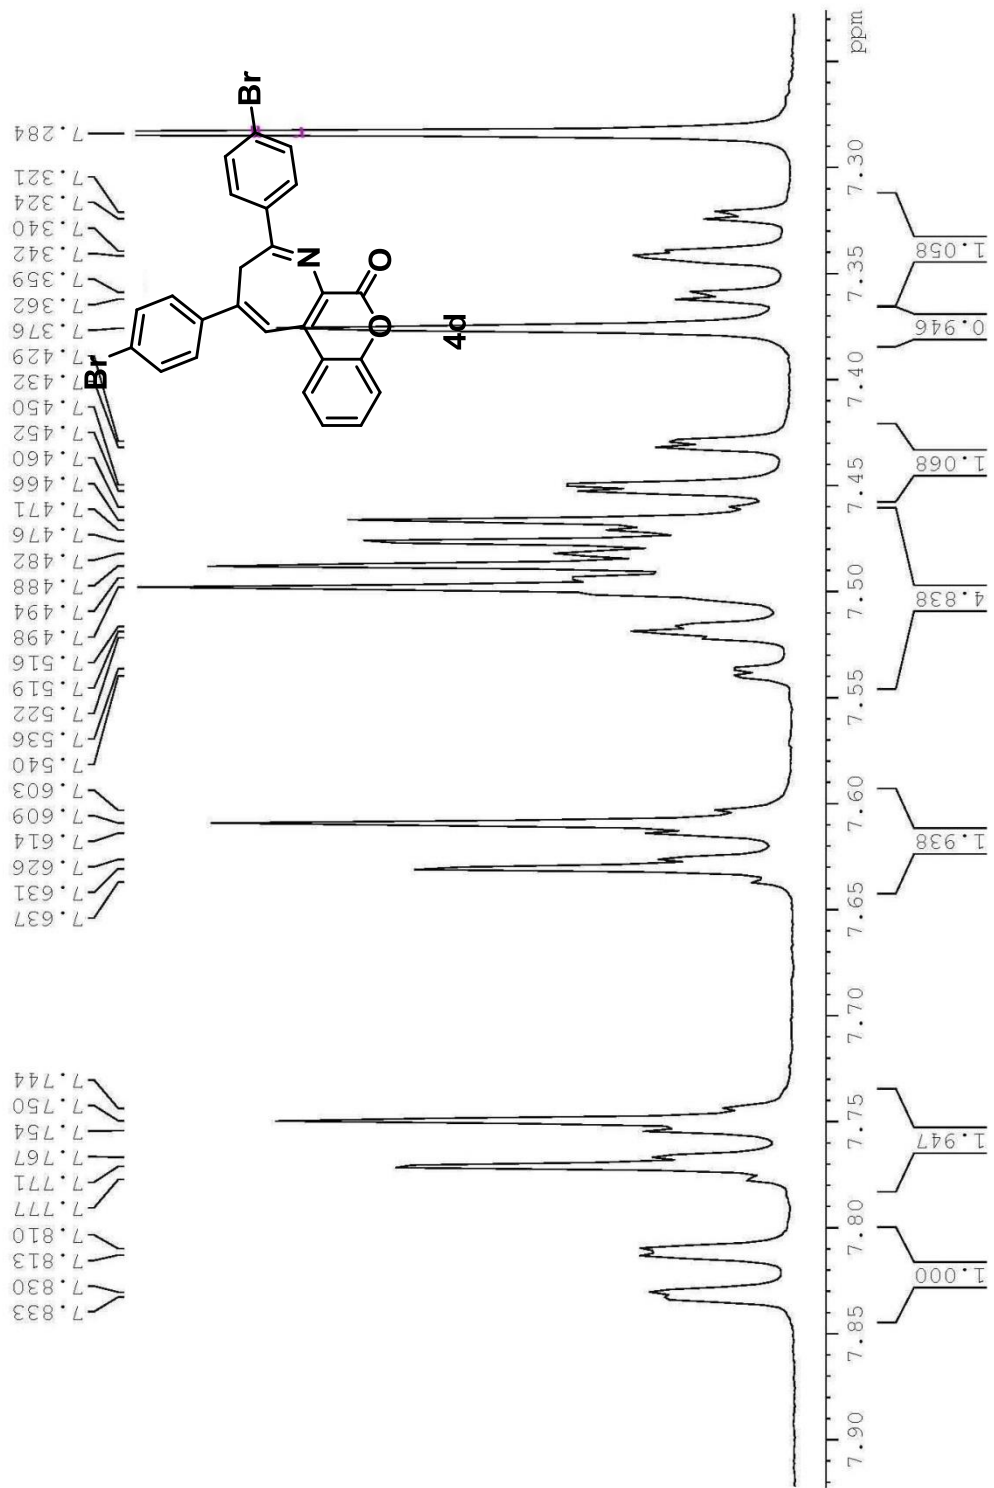

```

BMK-4-546
exp6 CARBON
SAMPLE
date Jun 7 2017
solvent cdc13
file
ACQUISITION exp
sw 37870.8 gain not used
ns 865 not used
pc 65536 rst n
fb 17000 pw90 10.250
bs 8 alfa 10.000
d1 2.000
nt 30000 l1
ct 1112 in n
in TRANSMITTER C13 n
ns y
sfrq 150.869 ns
tof 2297.1 lb 3.00 PROCESSING
tpr 59 fn 262144
pw 5.125 SP DISPLAY
dc H1 -1508.7
dof 0 pfl 13984.4
dm VVY w ffp 11615.6
decwave w pp 49.9
dppr 44 lp
dmf 11696 WC 268
VS 119
th nm cdc ph 6
PRESATURATION n
wet satmode n
temp not used

```

```

159.587
150.503
150.256
137.098
136.066
134.616
132.438
132.369
131.866
131.119
130.137
130.087
129.363
126.102
124.558
124.204
124.135
119.619
119.399
117.311

```

```

77.213
77.000
76.789
36.492

```

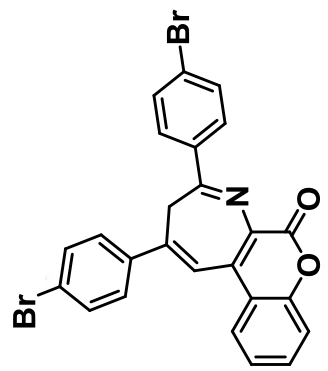

4d

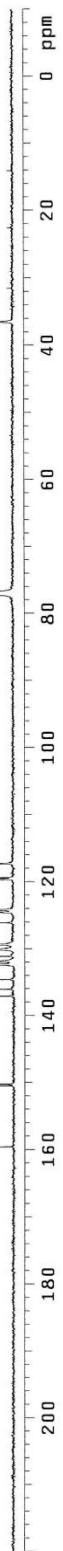

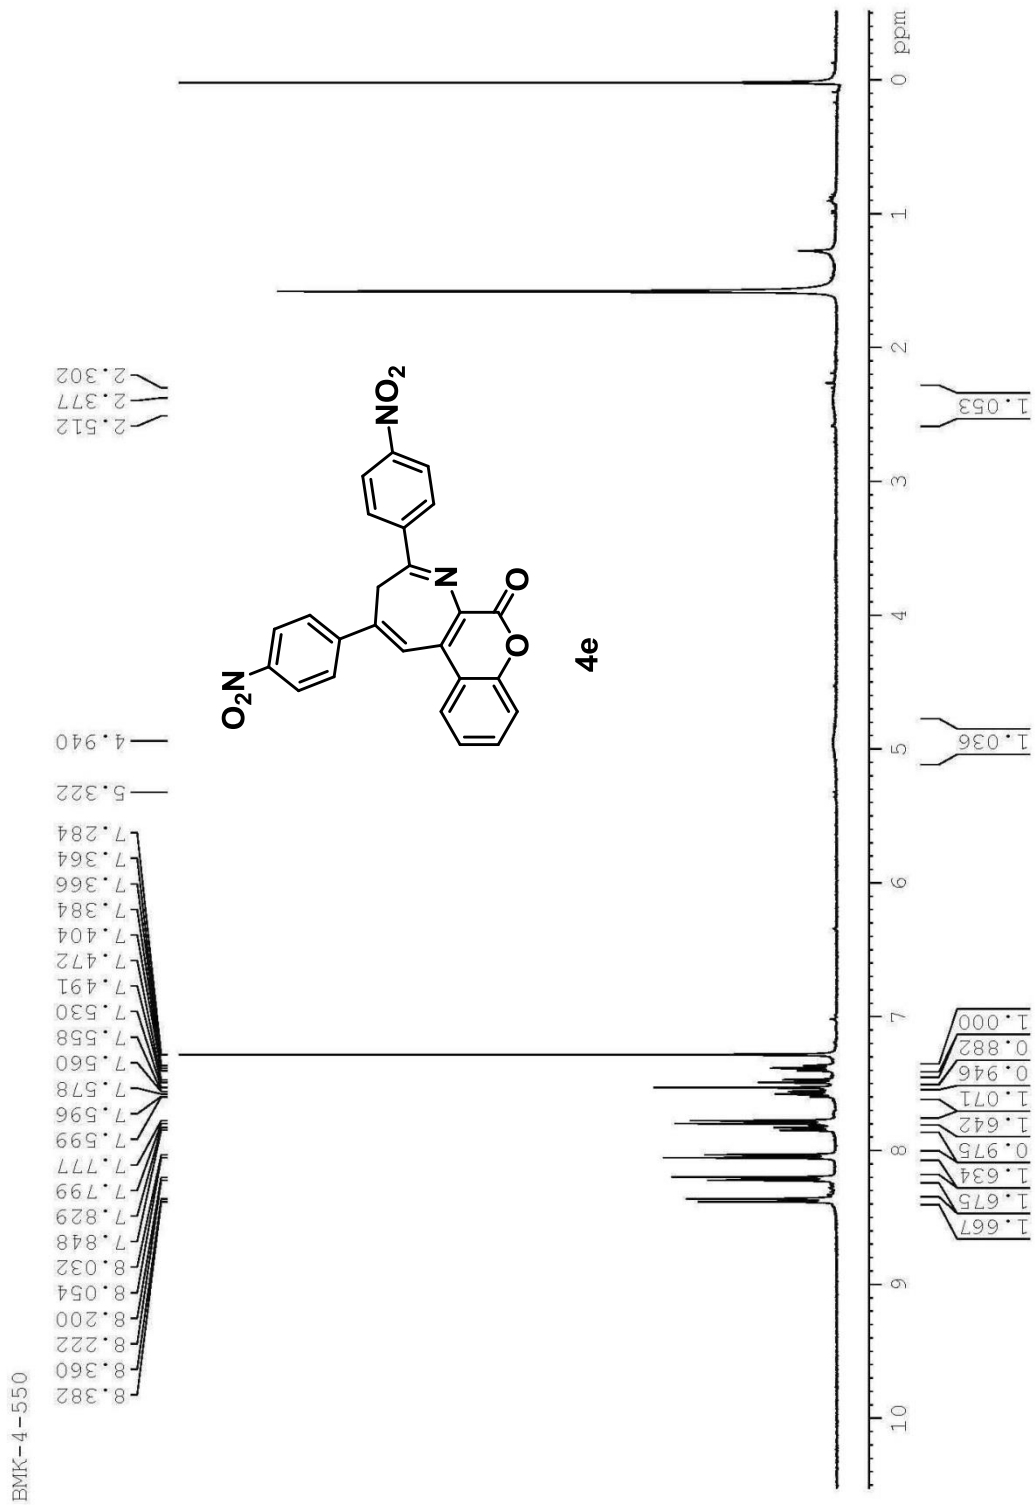



BMK-4-550

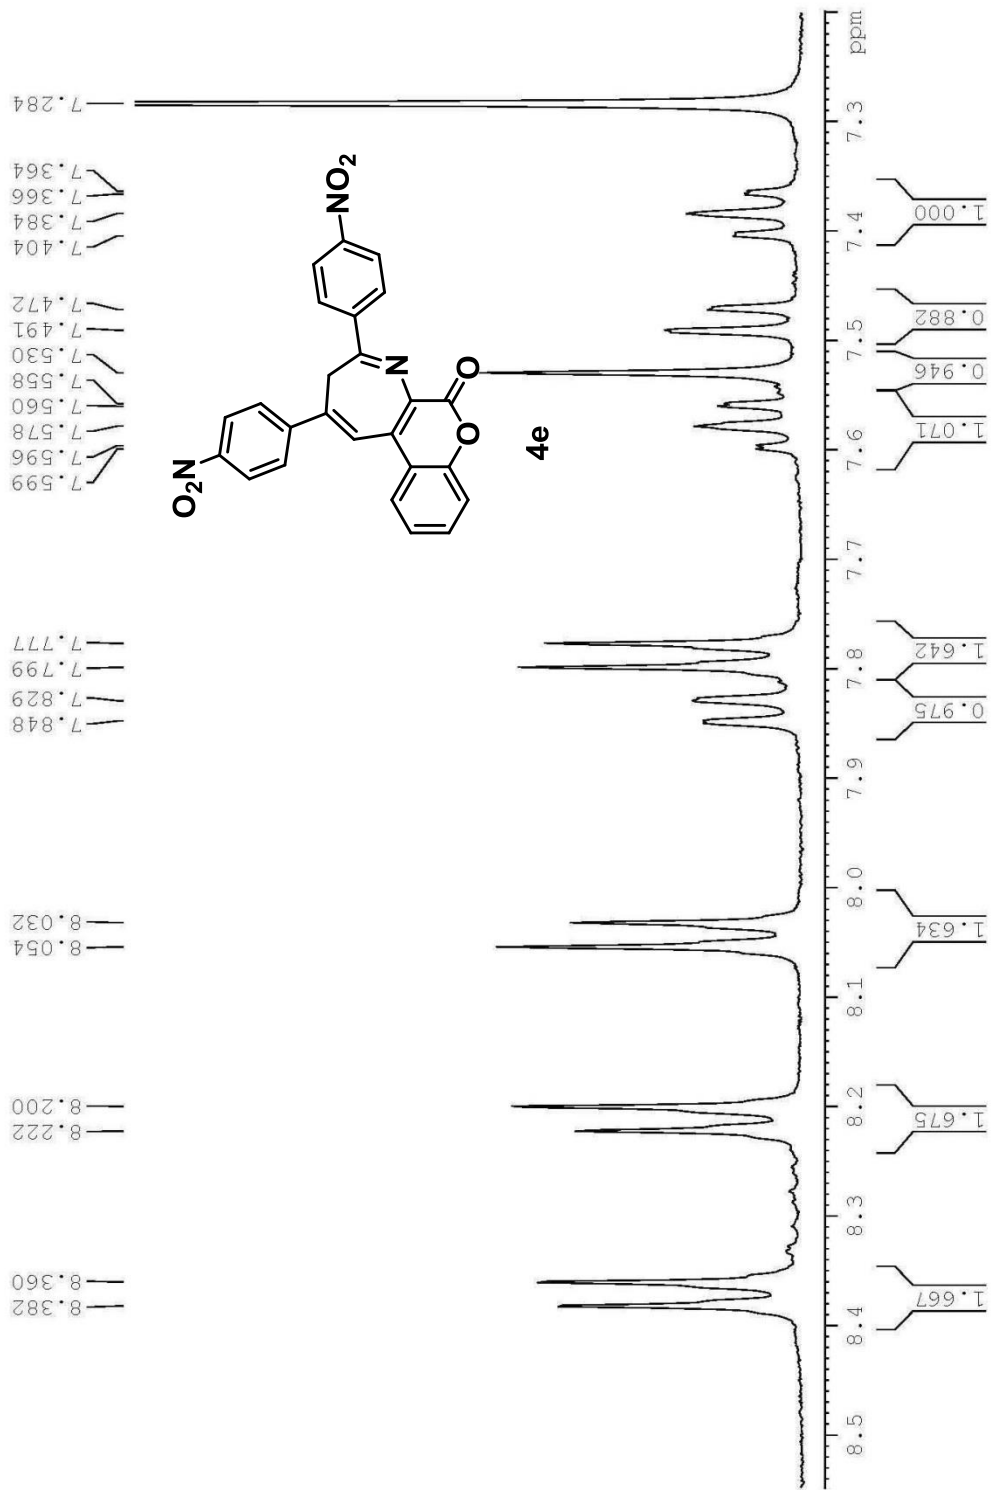

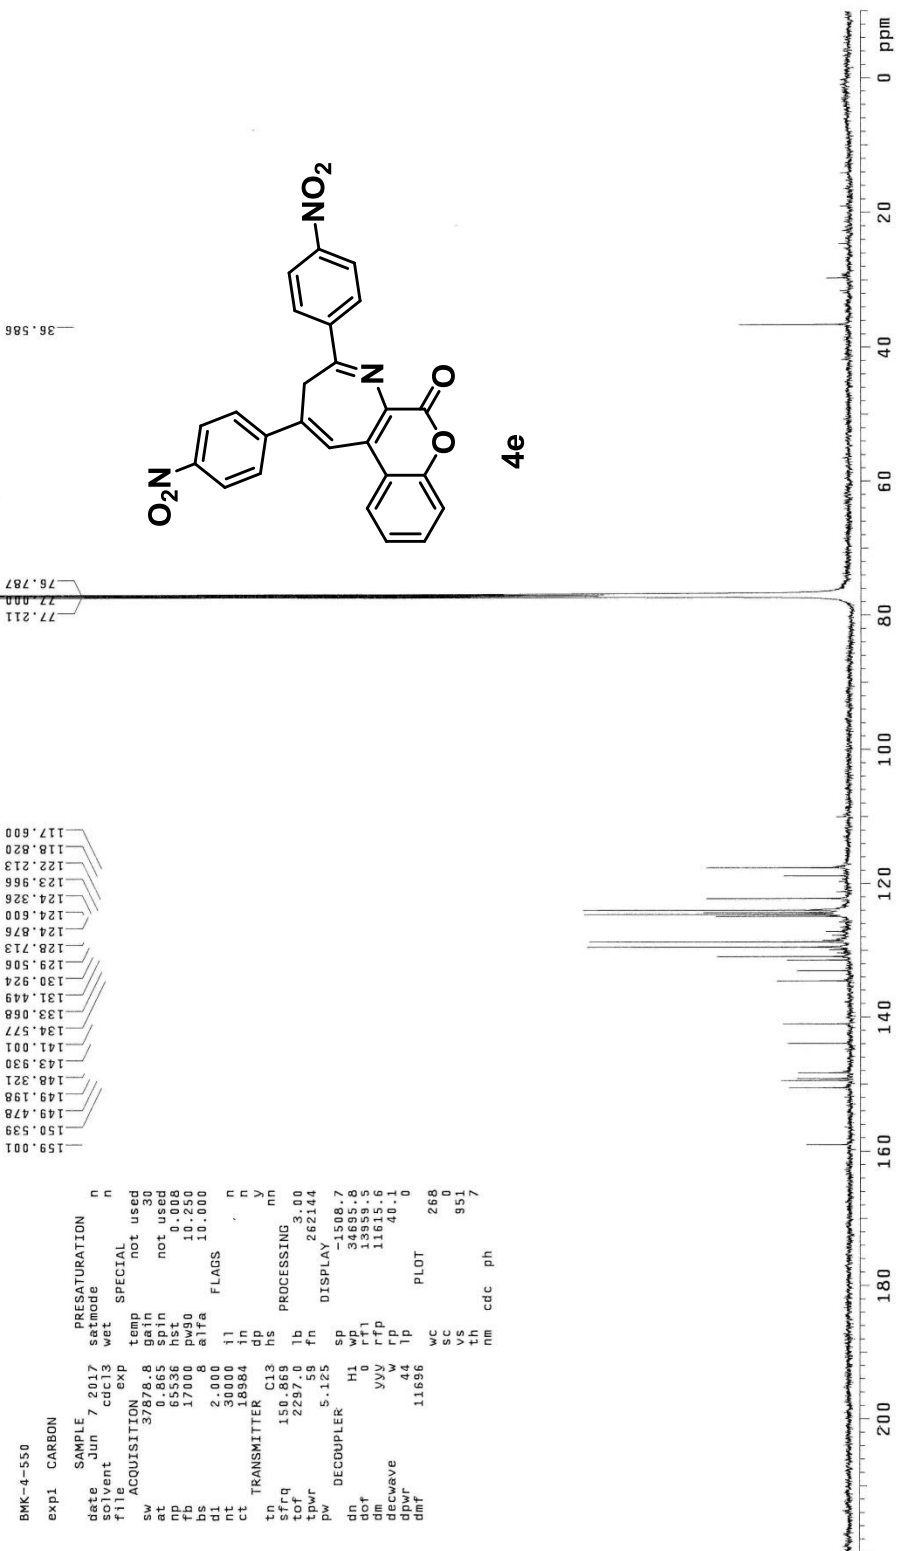

BMK-4-550  
 exp1 CARBON

|            |             |               |          |
|------------|-------------|---------------|----------|
| date       | SAMPLE      | PRESATURATION | n        |
| Jun 7 2017 | satmode     |               |          |
| solvent    | cdc13       | wet           | n        |
| fill       |             | SPECIAL       |          |
| sw         | 37878.8     | temp          | not used |
| at         | 0.865       | spin          | 30       |
| np         | 65536       | hst           | not used |
| fb         | 17000       | pw90          | 10.008   |
| ds         | 2.000       | aifa          | 10.250   |
| dl         | 30000       | flags         | 10.000   |
| cl         | 18984       | in            | n        |
| tn         | TRANSMITTER | dp            | y        |
| sfrq       | 150.869     | hs            | nn       |
| tof        | 2287.0      | lb            | 3.00     |
| tpwr       | 5.125       | fn            | 262144   |
| pw         | DECOUPLER   | sp            | -1508.7  |
| dn         | H1          | wp            | 34655.8  |
| def        | 0           | rfl           | 13959.5  |
| dm         | yyv         | rtp           | 11615.6  |
| decwave    | 44          | rp            | 40.1     |
| decpr      | 44          | fp            | 0        |
| dmf        | 11686       | wc            | 268      |
|            |             | sc            | 0        |
|            |             | vs            | 951      |
|            |             | th            | 7        |
|            |             | nm            | cdc      |
|            |             |               | ph       |

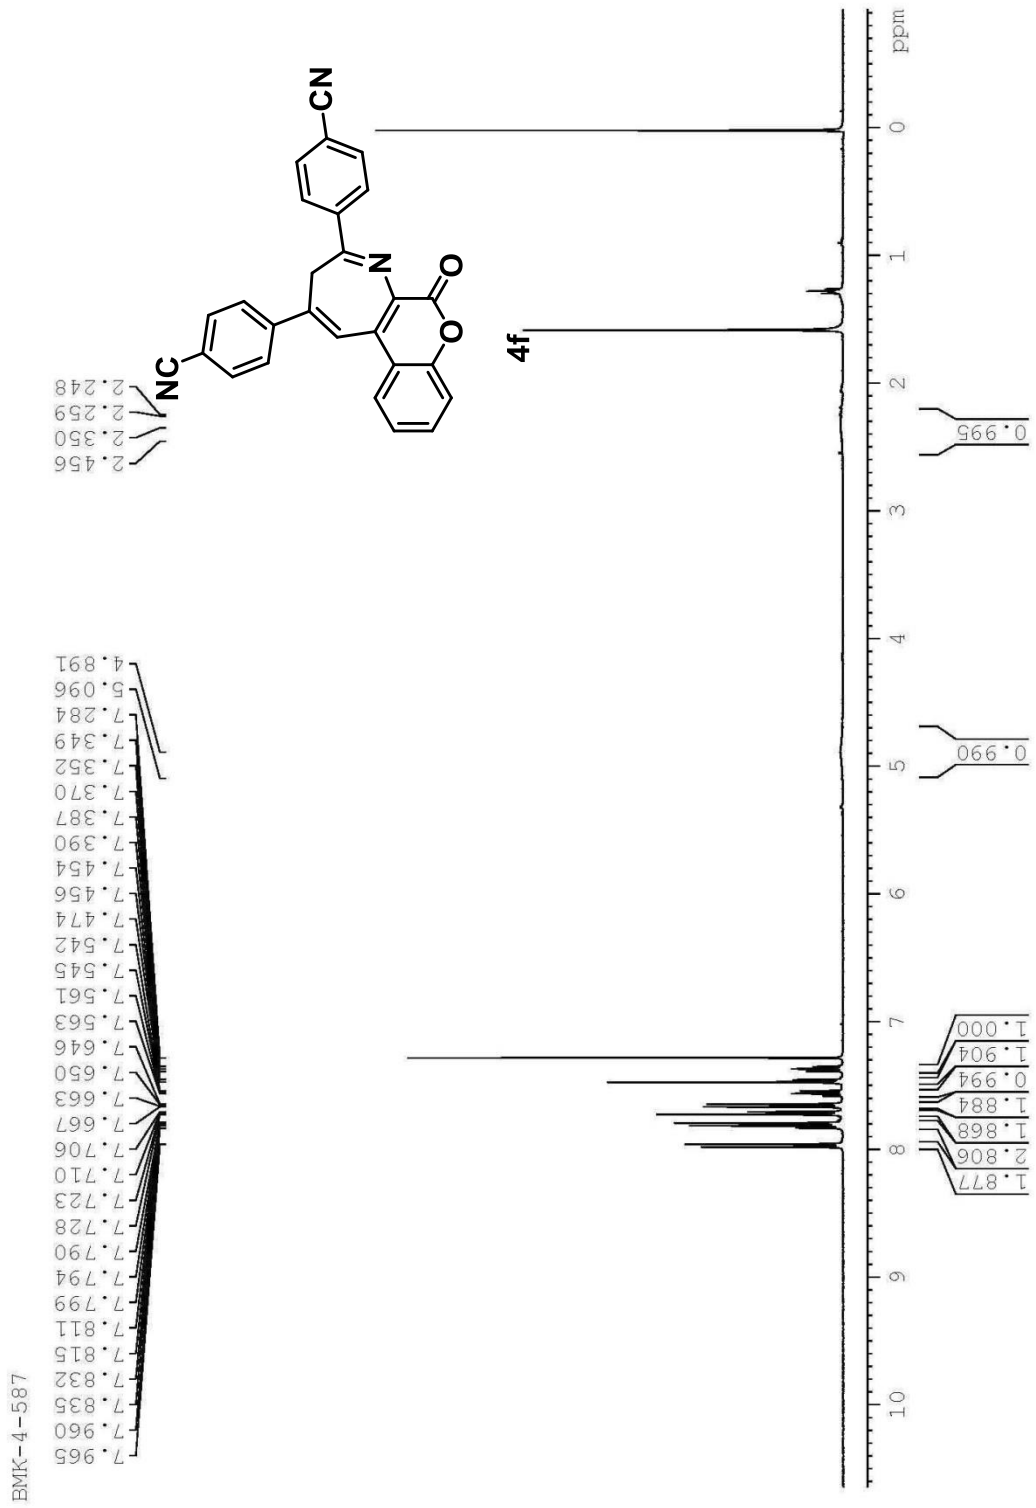

BMK-4-587

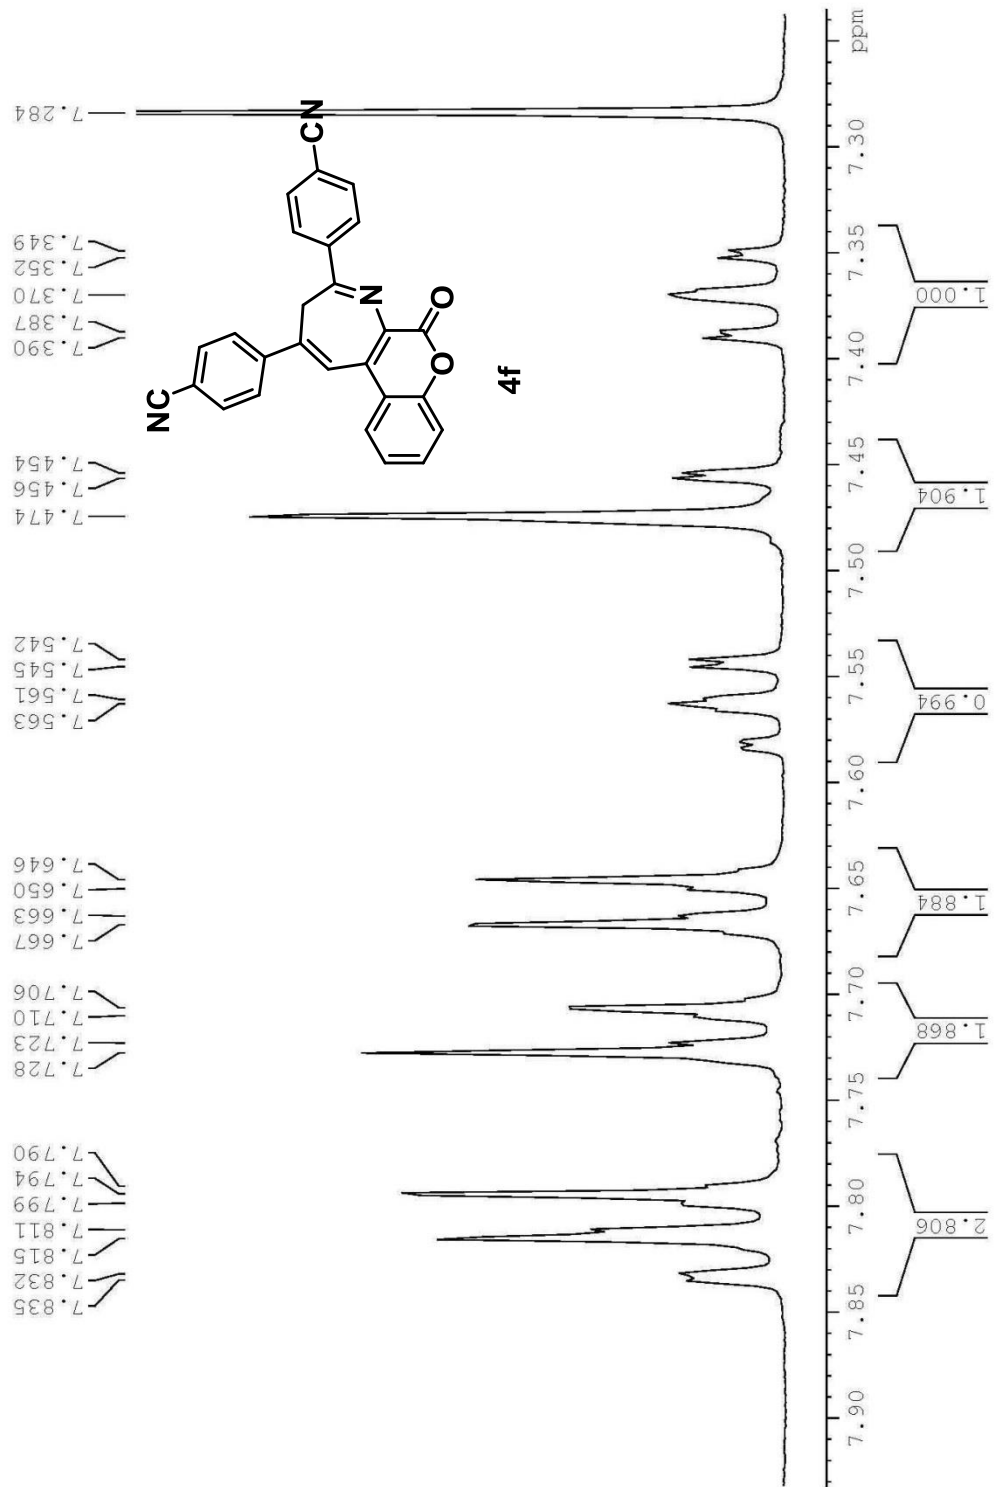

BMK-4-587  
exp1 CARBON

|          |            |          |                 |
|----------|------------|----------|-----------------|
| date     | Jun 5 2017 | satmode  | n               |
| solvent  | cdcl3      | wet      | SPECIAL         |
| acq1     | 37878.8    | exp temp | not used        |
| at       | 0.865      | spin     | not used        |
| np       | 65536      | hst      | 0.008           |
| fb       | 17000      | pw90     | 10.250          |
| ds       | 2.00       | aiFa     | 10.000          |
| nt       | 3000       | il       | FLAGS           |
| ct       | 784        | in       | n               |
| tn       | C13        | dp       | n               |
| tf       | 150.869    | hs       | v               |
| trf      | 2297.0     | lb       | nm              |
| pw       | 5.125      | fn       | PROCESSING 3.00 |
| de       | 11658      | rf       | 262144          |
| decouple | H1         | wd       | DISPLAY         |
| dm       | 0          | rf1      | -1508.7         |
| decweave | yy         | rff      | 34695.6         |
| decw     | w          | rp       | 13983.8         |
| decr     | lp         | rp       | 11615.6         |
| decf     | 11698      | lp       | 67.5            |
| drf      | 268        | wc       | 0               |
|          | 0          | sc       | 0               |
|          | 168        | vs       | 168             |
|          | 6          | th       | nm              |
|          |            | cdc      | ph              |

159.070  
150.440  
149.836  
142.145  
139.401  
135.014  
133.039  
132.867  
132.485  
131.428  
130.775  
129.005  
128.397  
124.801  
124.290  
121.723  
118.886  
117.968  
117.502  
114.592  
113.382

77.213  
77.000  
76.789  
36.210

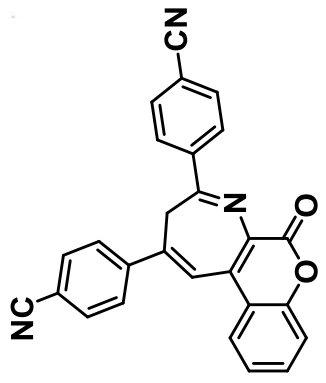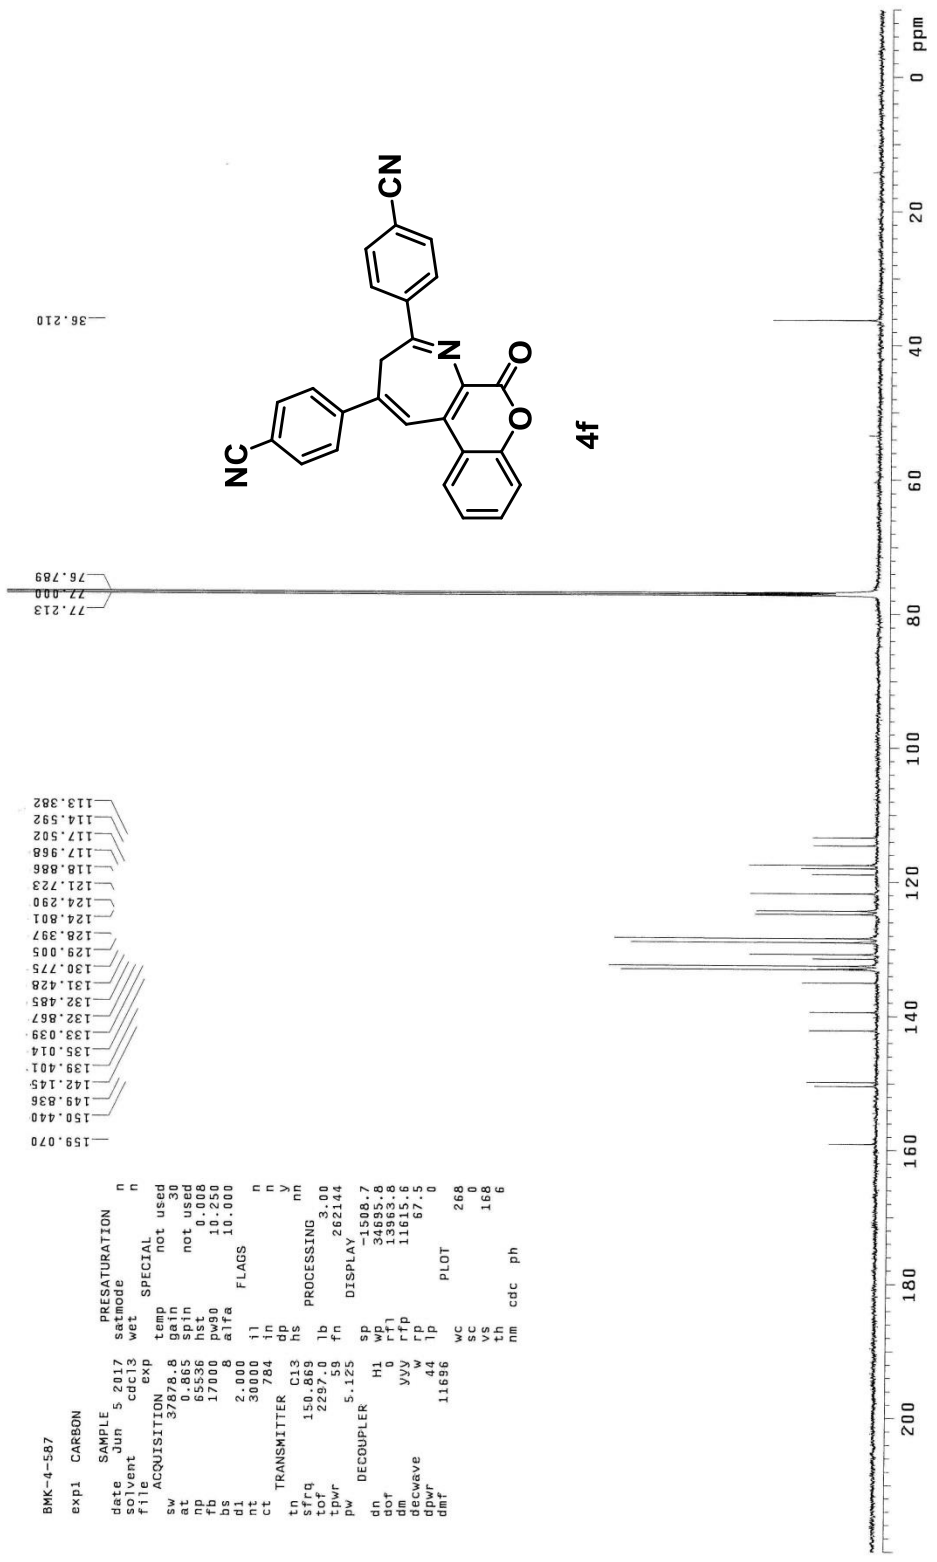

BMK-4-549

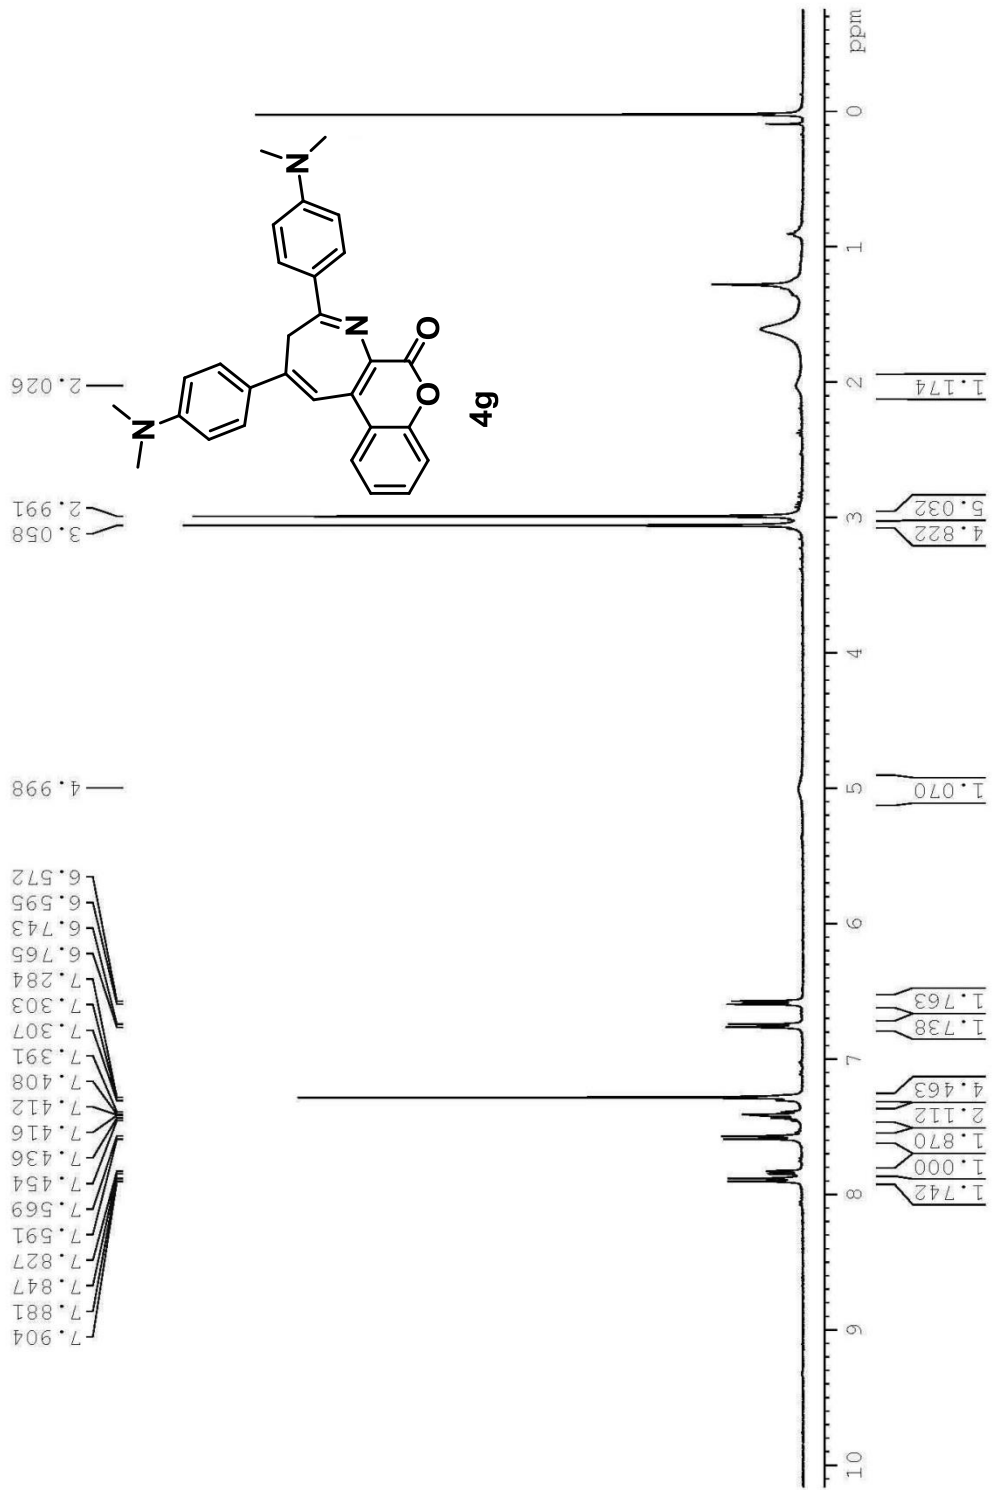

BMK-4-549

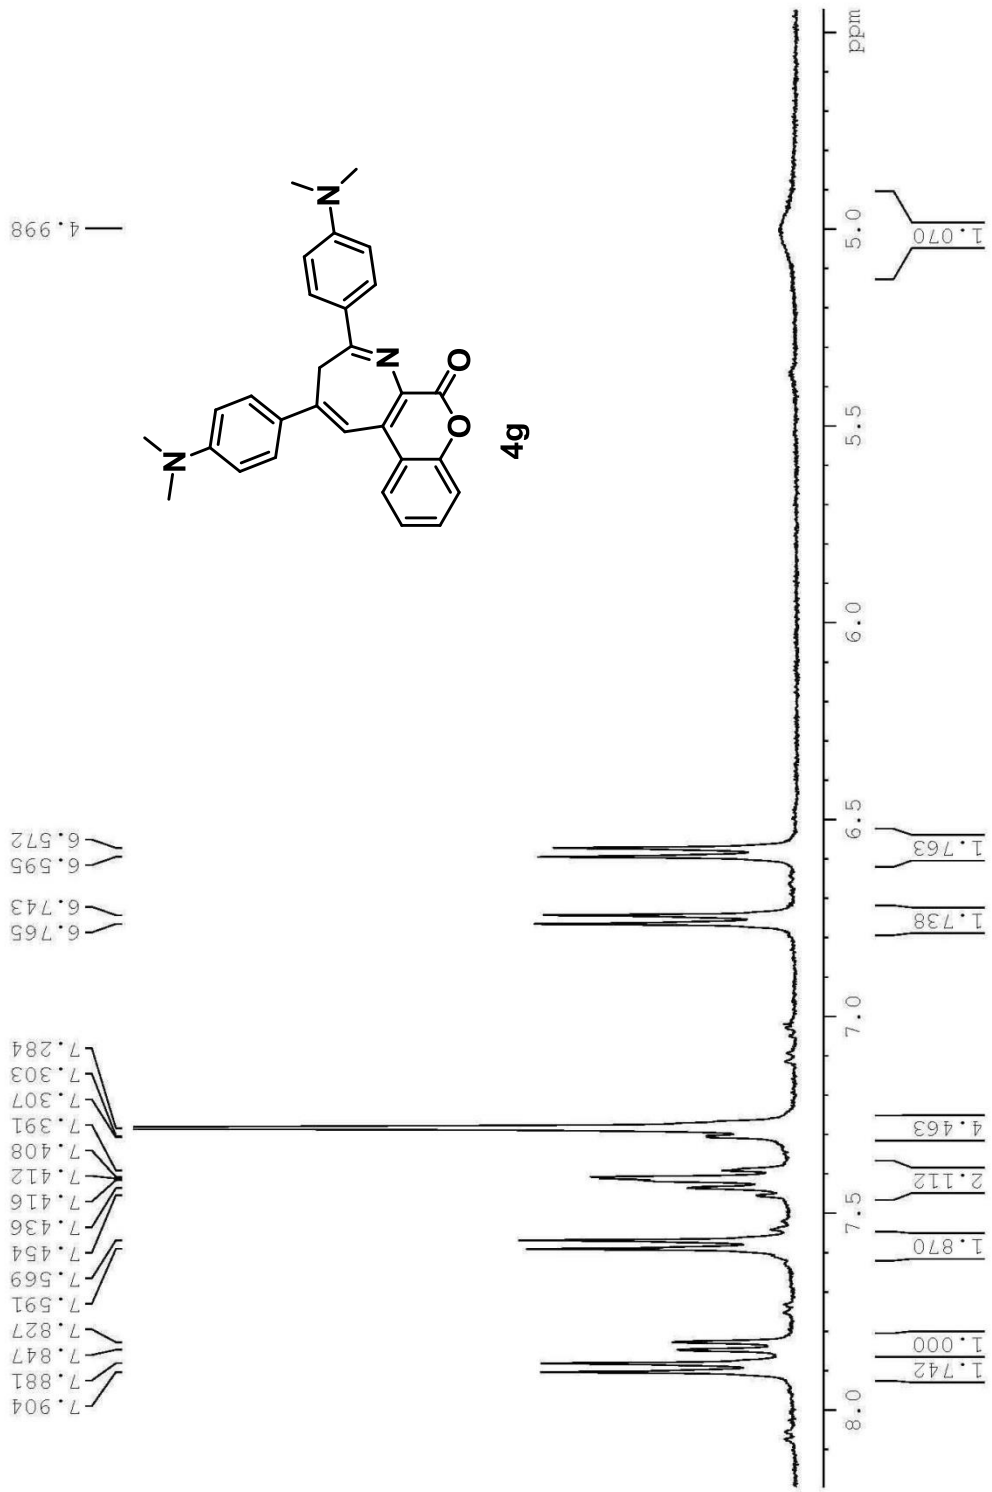

BMK-4-549  
 exp5 CARBON  
 date SAMPLE Jun 5 2017 PRESATURATION n  
 solvent cdc13 wet satmode n  
 fl ACQUISITION exp SPECIAL not used  
 sw 37878.8 gain temp not used  
 at 0.865 spin not used  
 np 65536 hst 0.008  
 rb 17000 pw90 10.250  
 ds 8 aifa 10.000  
 dt 2.000 fl  
 nt 10000 in n  
 ct 10000 in n  
 tn TRANSMITTER C13 dp in n  
 v y  
 sfrq 150.869 hs PROCESSING nn  
 tor 2297.0 lb 3.00  
 pwr 5.125 fn DISPLAY 262144  
 pw DECOUPLER H1 sp -1508.7  
 dn 0 rfl 34695.8  
 dm 0 vvy rfp 13961.8  
 dm wave wv rfp 11615.6  
 dmf 4x tp 45.6  
 dmf 11686 tp PLOT 0  
 wc 268  
 sc 0  
 vs 176959  
 th cdc ph 5  
 a1 cdc ph

160.846  
 151.075  
 151.421  
 150.876  
 149.961  
 137.830  
 131.698  
 130.445  
 129.211  
 128.905  
 126.016  
 124.106  
 123.953  
 123.826  
 120.642  
 117.060  
 115.746  
 112.018  
 111.232  
 76.789  
 77.000  
 77.213  
 40.216  
 40.007  
 35.971  
 29.685

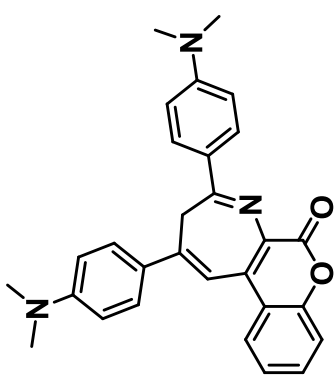

4g

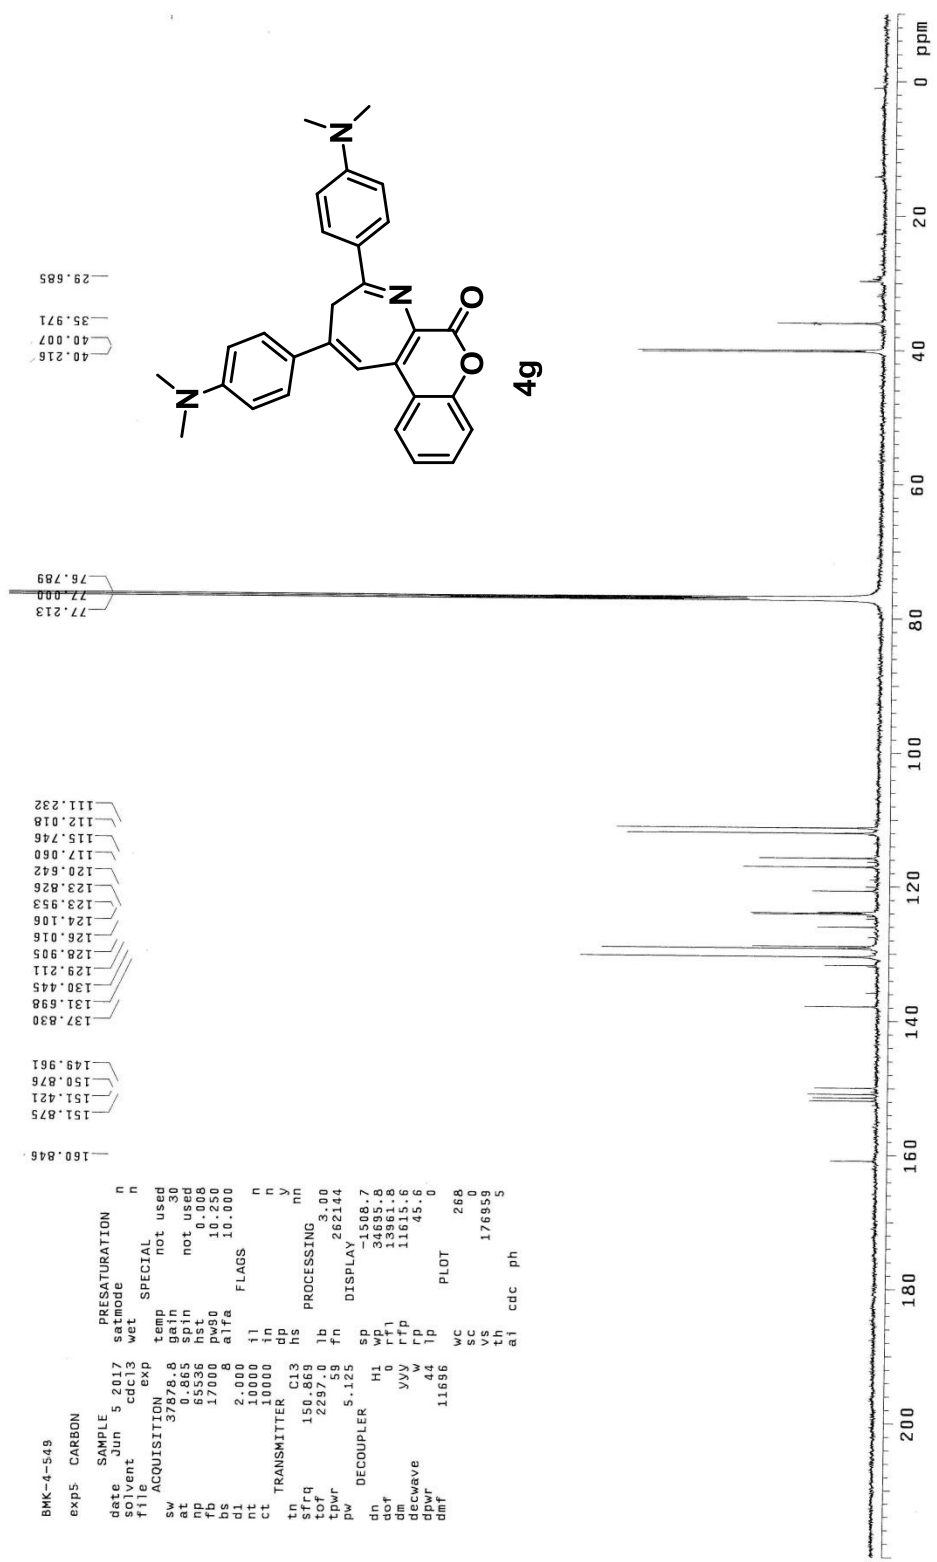



BMK-4-551-2

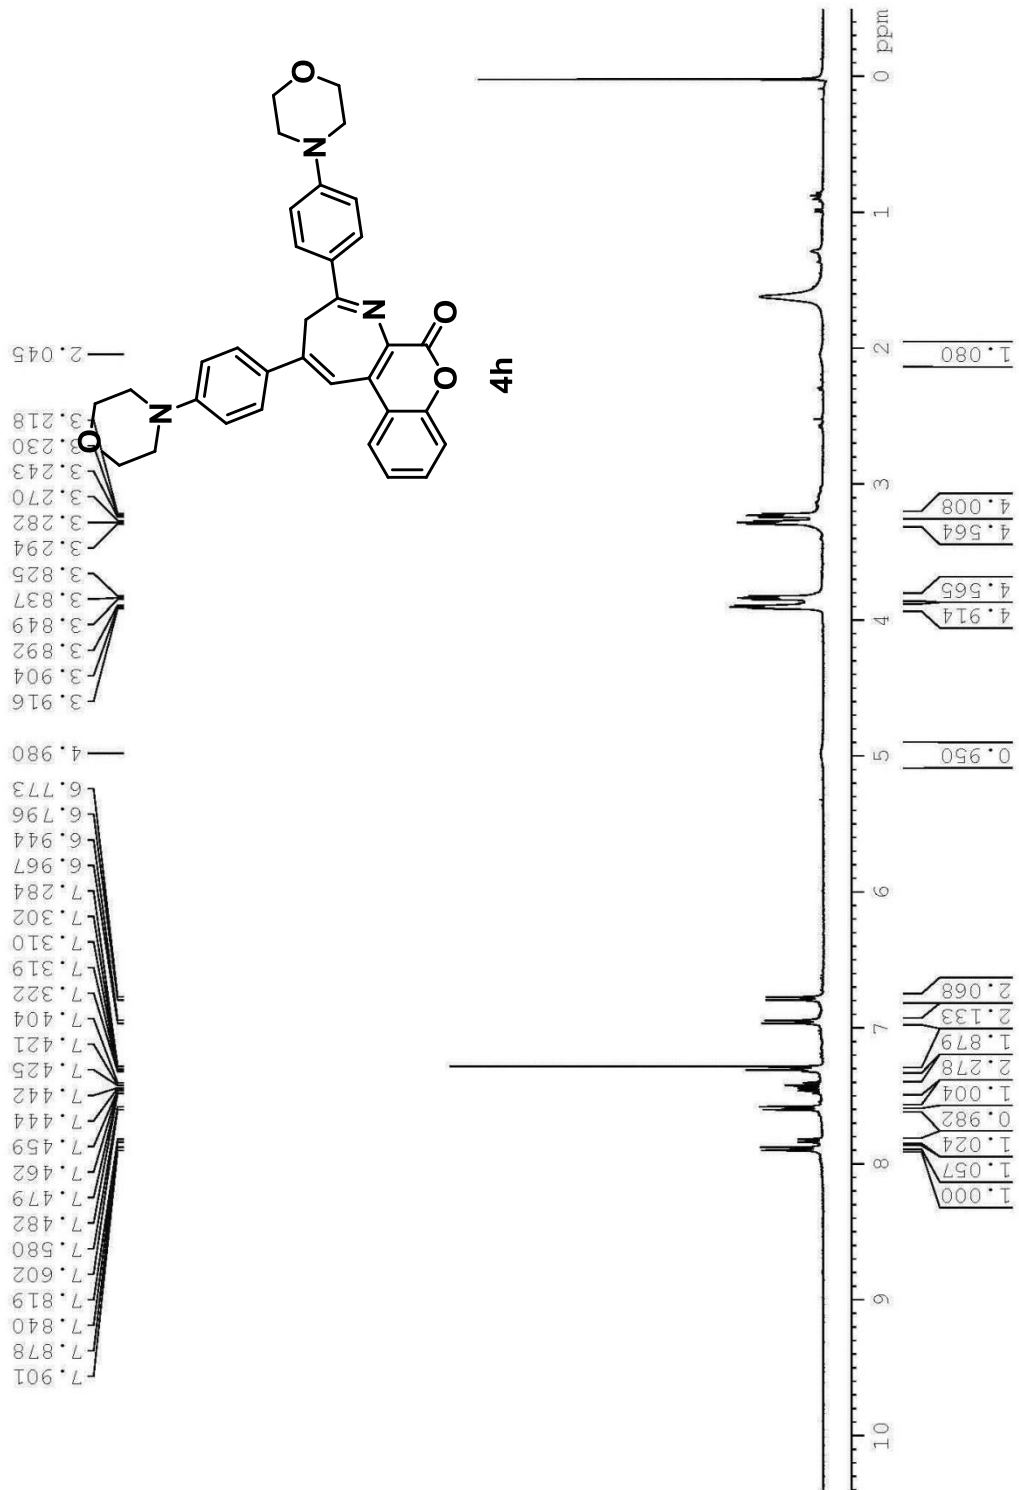

BMK-4-551-2

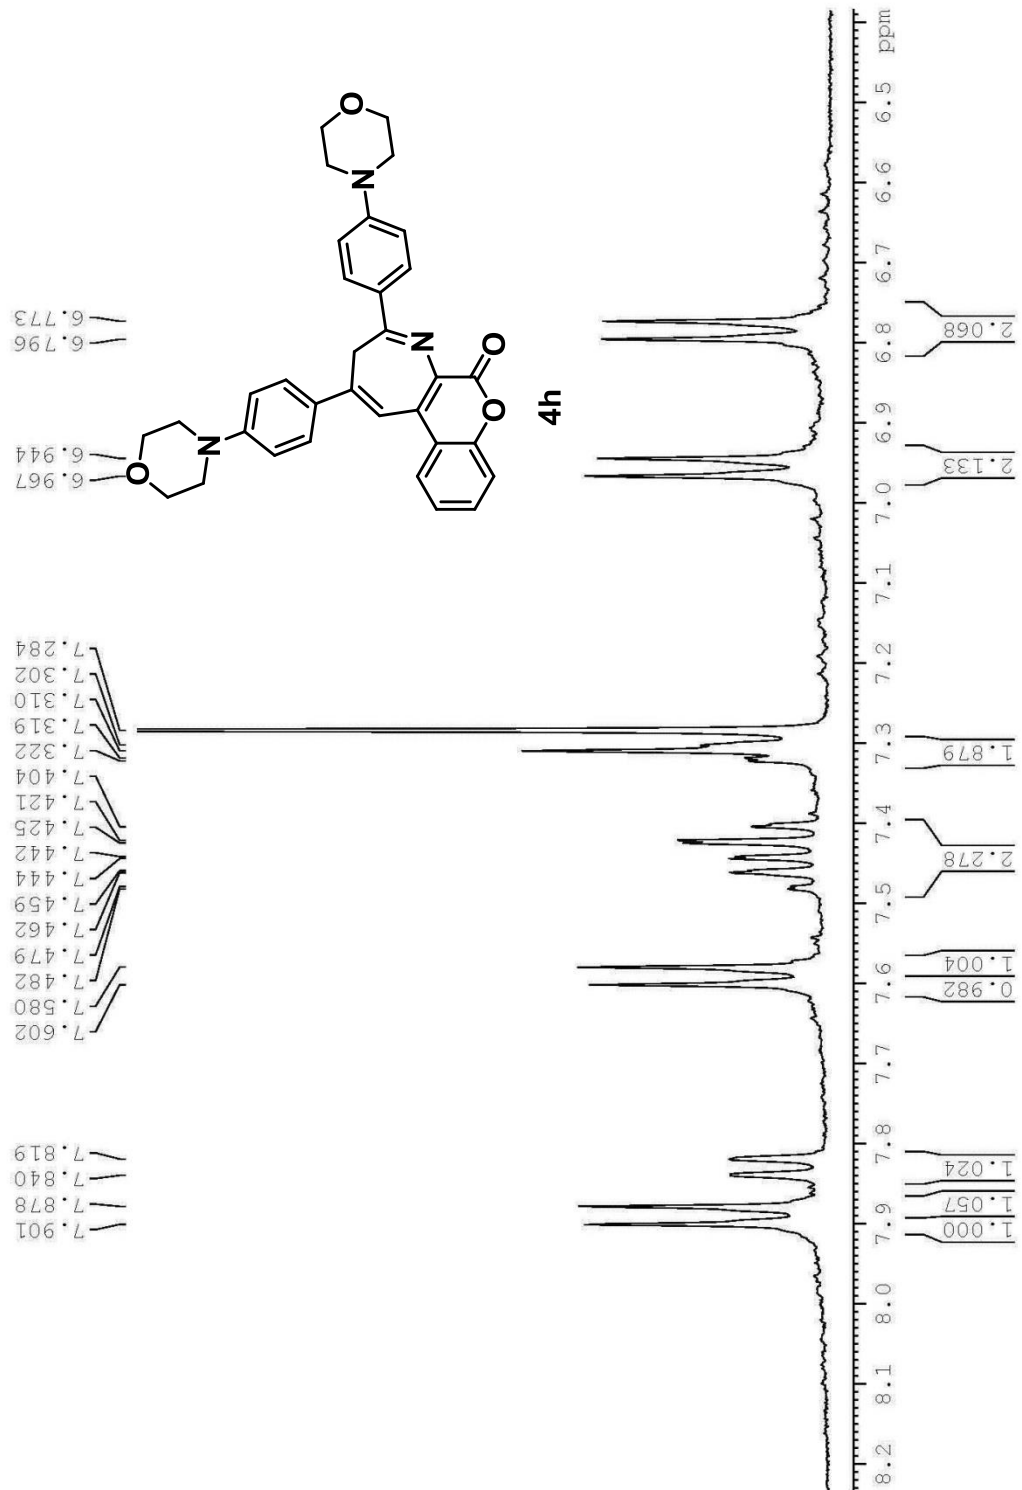

BMK-4-551

```
exp1 CARBON
date SAMPLE 6 2017 satmode n
solvent Jun cdc13 wet SPECIAL n
file 37078.8 temp not used
acq sw 0.865 spin not used
at 65536 hst 0.008
np 17000 pw50 10.250
bs B alfa 10.000
d1 2.000 t1 n
nt 30000 t2 n
ct 4450 dp V
tn TRANSMITTER C13 hs nn
sfrq 150.869 lb PROCESSING 3.00
tof 2297.0 fb 262144
tpwf 59 fh DISPLAY 1508.7
pw DECOUPLER H1 wd 34695.8
dn 0 rf1 13960.1
dm vvy rfp 11615.6
decwave w rp 50.6
dpwr 44 lp 0
dmf 11656 wc 268
sc 0
vs 1345
th nm cdc ph 6
```

160.472  
152.700  
151.685  
151.047  
150.083  
137.194  
132.012  
130.652  
130.317  
129.301  
129.171  
126.847  
124.244  
124.020  
120.282  
117.175  
116.993  
114.932  
113.956

77.211  
77.000  
76.787  
56.701  
48.275  
47.770  
36.153

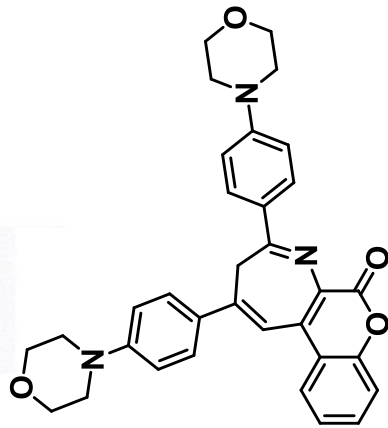

4h

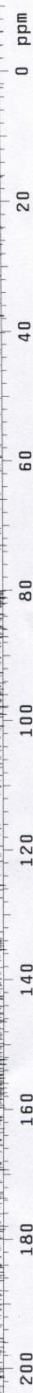

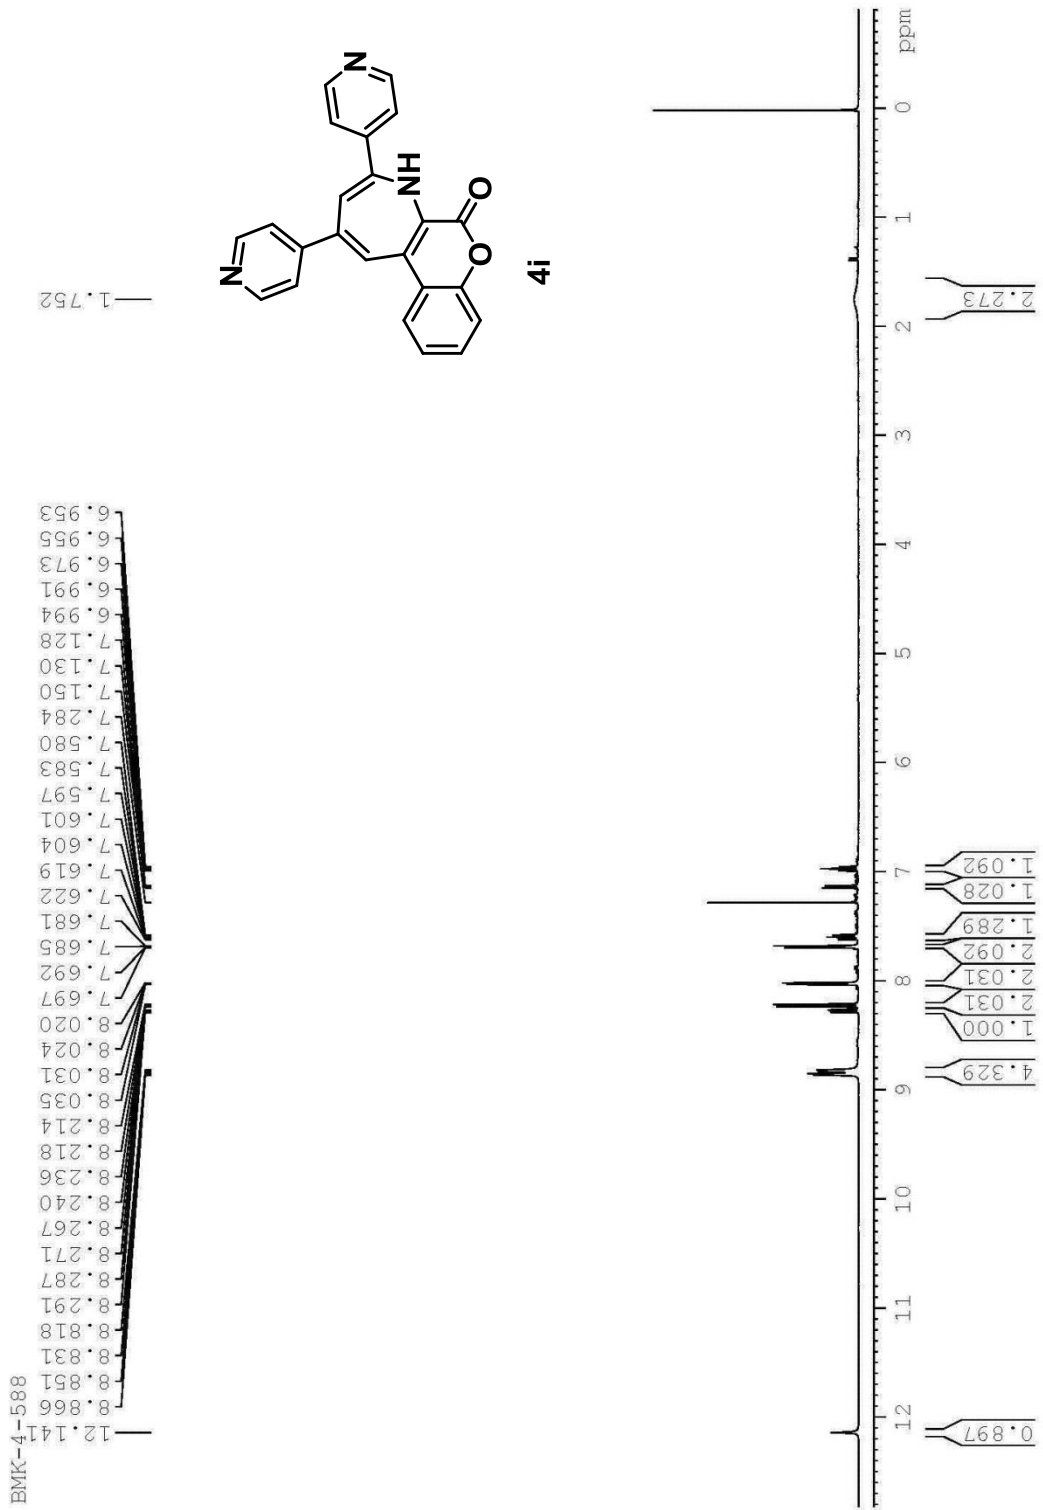

BMK-4-588

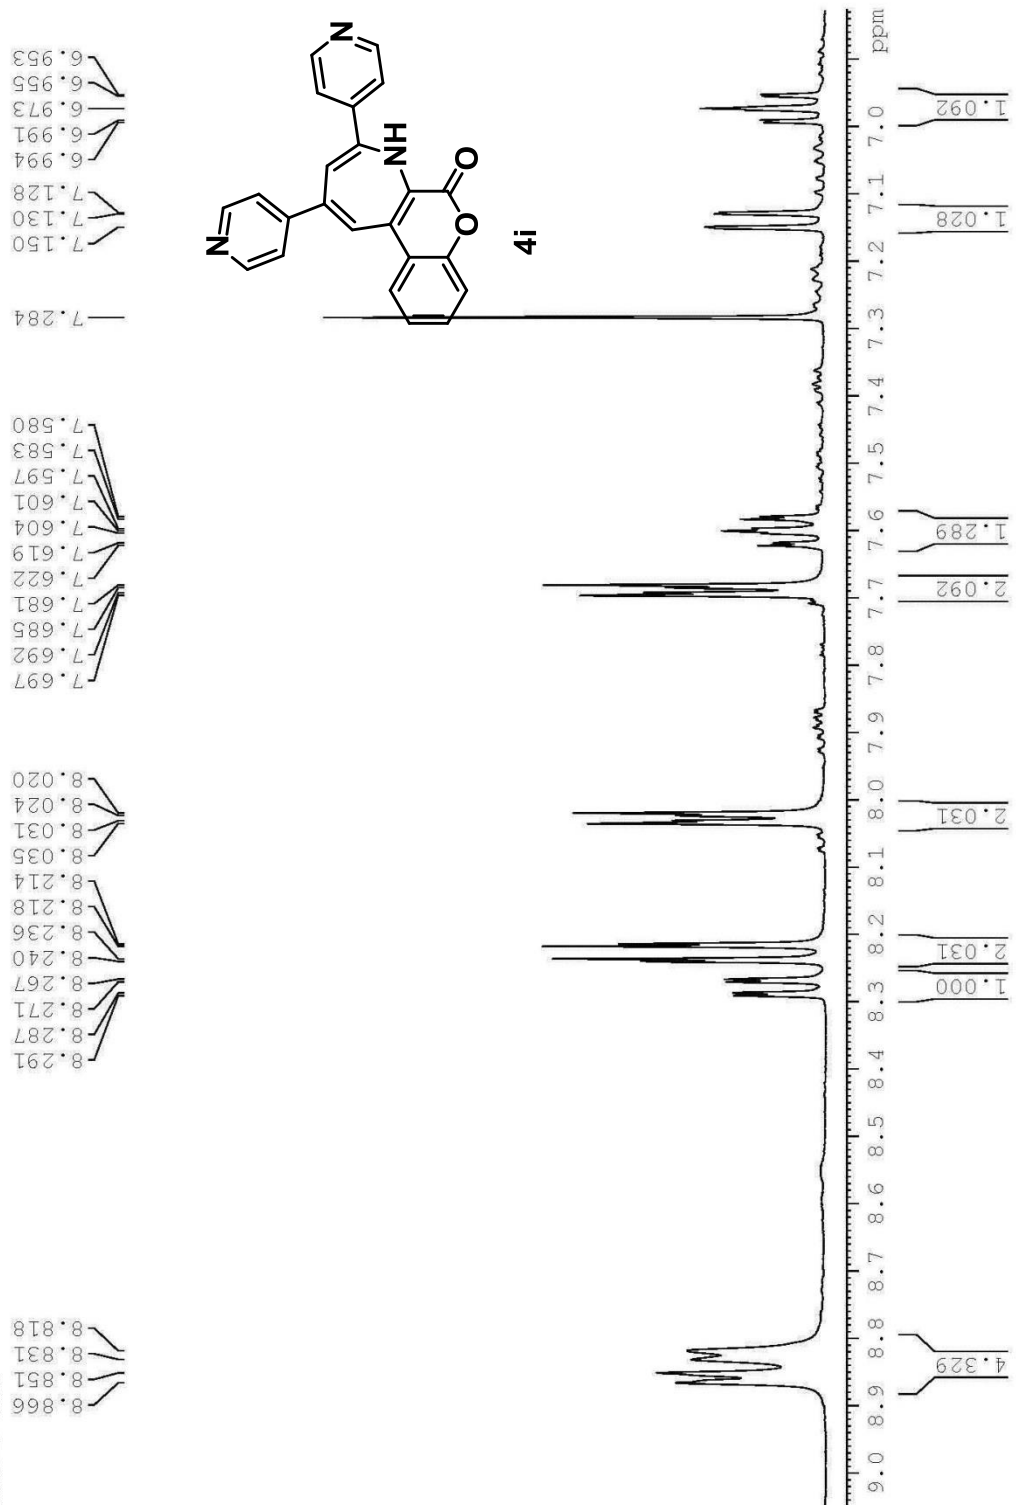

```

BNK-4-588
EXPI CARBON
date SAMPLE PRESATURATION n
  Jun 6 2017 satmode n
solvent cdc13 wet n
file cdc13 wet SPECIAL n
sv 37878.8 temp not used
at 0.865 spn not used
np 65536 hst 0.008
fb 17000 pw90 10.250
bs 8 alfa 10.000
dl 2.000
nl 30000 ll n
ct 328 dd n
  Y v
tn TRANSMITTER C13 ns
sfrq 150.869
tof 2257.0 lb 3.00
tpwr 59 fn 262144
pw DECOUPLER H1 1508.7
  0 PF1 34695.8
  0 PF1 13993.2
dm vvy rfp 11615.6
  w rfp 60.9
decwave 44 lp 0.0
dpwr 11696 uc 268
dmr SC 0
  VS 141
  th cdc ph 12

```

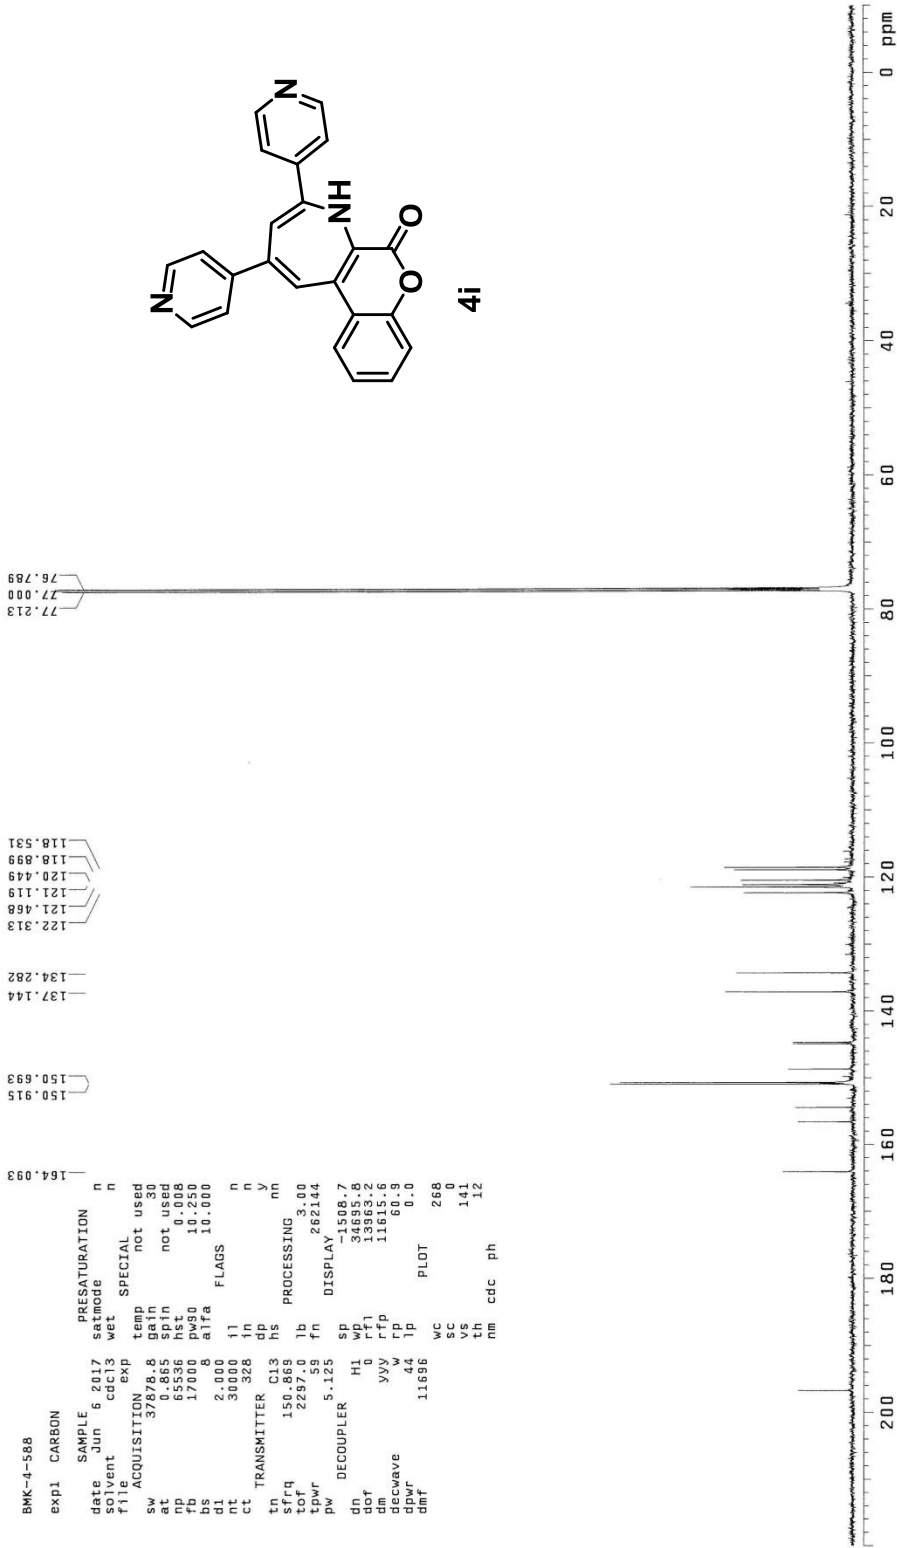

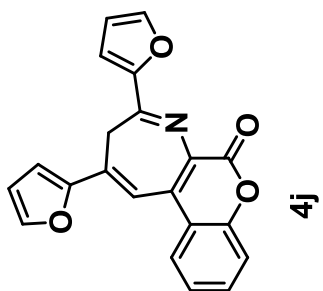

BMK-4-586

7.880  
7.609  
7.604  
7.602  
7.534  
7.530  
7.518  
7.515  
7.500  
7.497  
7.494  
7.480  
7.476  
7.476  
7.420  
7.417  
7.399  
7.396  
7.370  
7.366  
7.349  
7.347  
7.332  
7.328  
7.284  
7.217  
7.209  
6.936  
6.928  
6.558  
6.553  
6.549  
6.545  
6.540  
6.535  
6.531

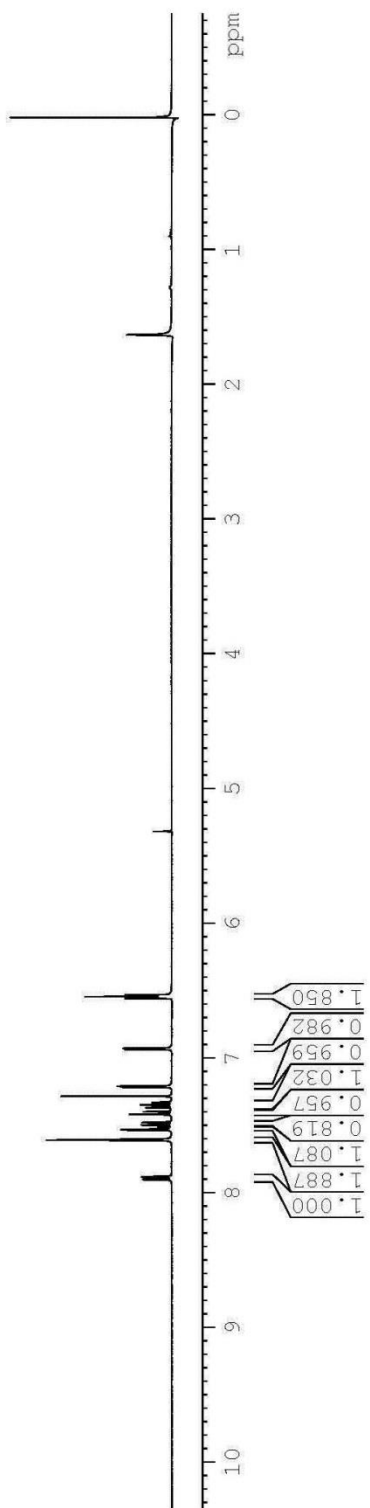

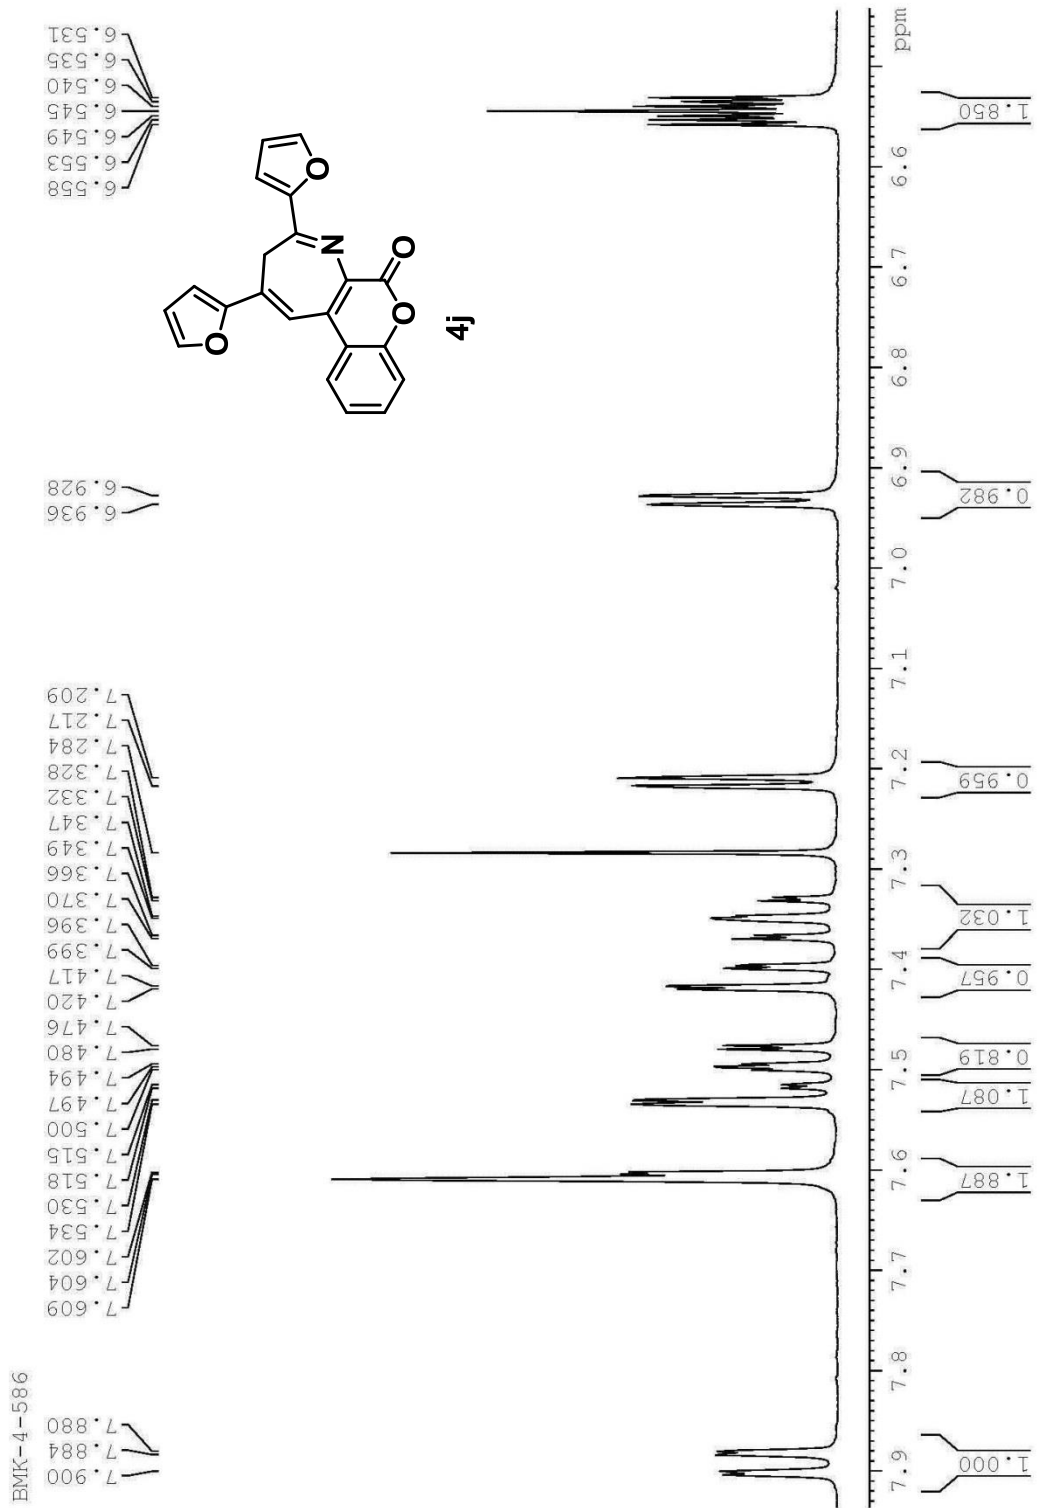



BMK-4-586  
 exp4 CARBON  
 date SAMPLE Jun 5 2017 PRESATURATION n  
 solvent cdc13 wet satmode  
 fil FILL SPECIAL n  
 sw ACQUISITION exp temp not used  
 at 0.865 dsfn 0.30  
 np 55536 hst 0.008  
 fb 17000 pw90 10.250  
 bs 2.000 b alfa 10.000  
 dl 3000 fl n  
 ct 300 in n  
 TRANSMITTER 304 dd V  
 tn C13 hs nn  
 sfrq 150.869 PROCESSING 3.00  
 tof 2297.0 lb  
 tdwr 5.98 fn 262144  
 pw DECOUPLER 5.123 DISPLAY  
 dn H1 wd -1508.7  
 dm 0 rfl 34685.8  
 decwave w rfp 13985.8  
 dpr 44.0 rfp 11615.6  
 dbrf 11656 rfp 46.9  
 WC 268  
 SC 0  
 VS 100  
 th cdc ph 6

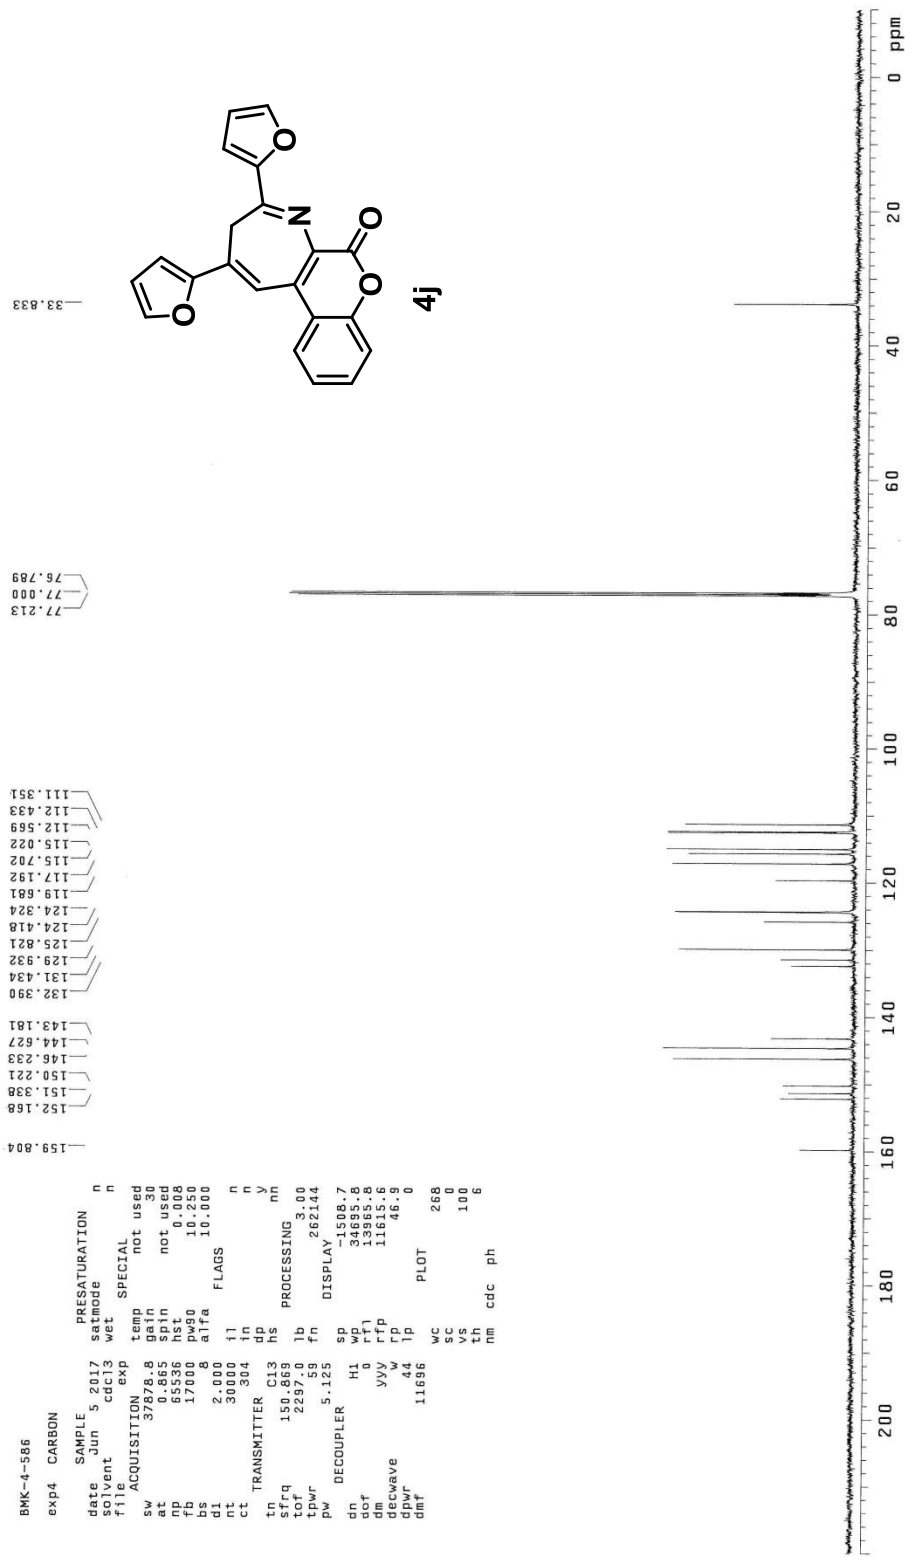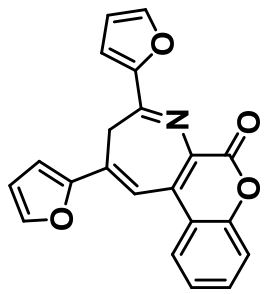

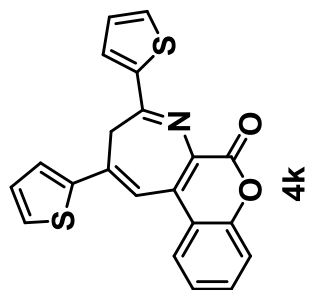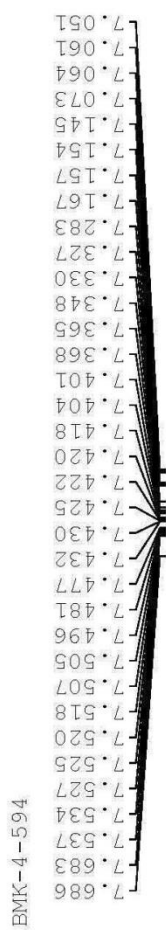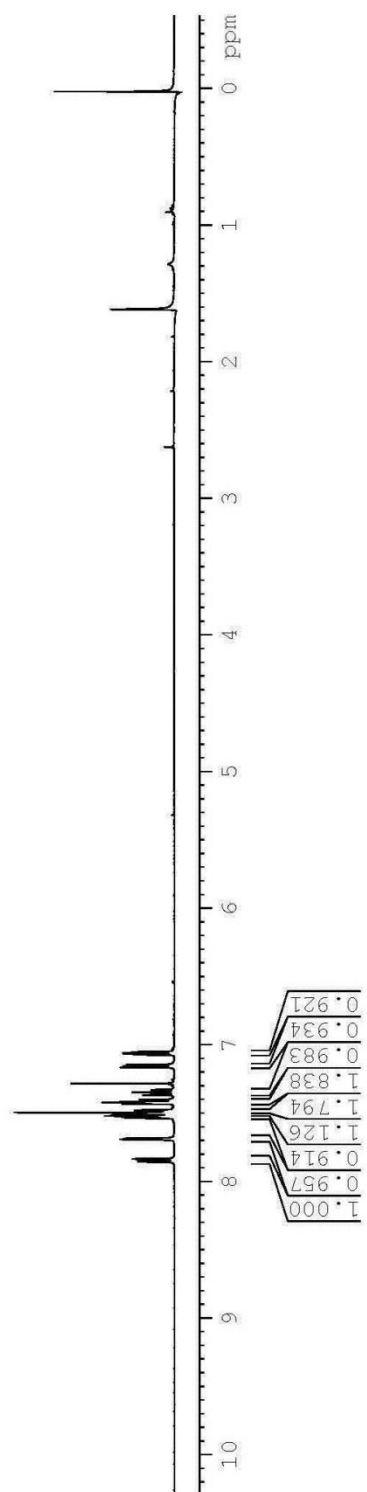

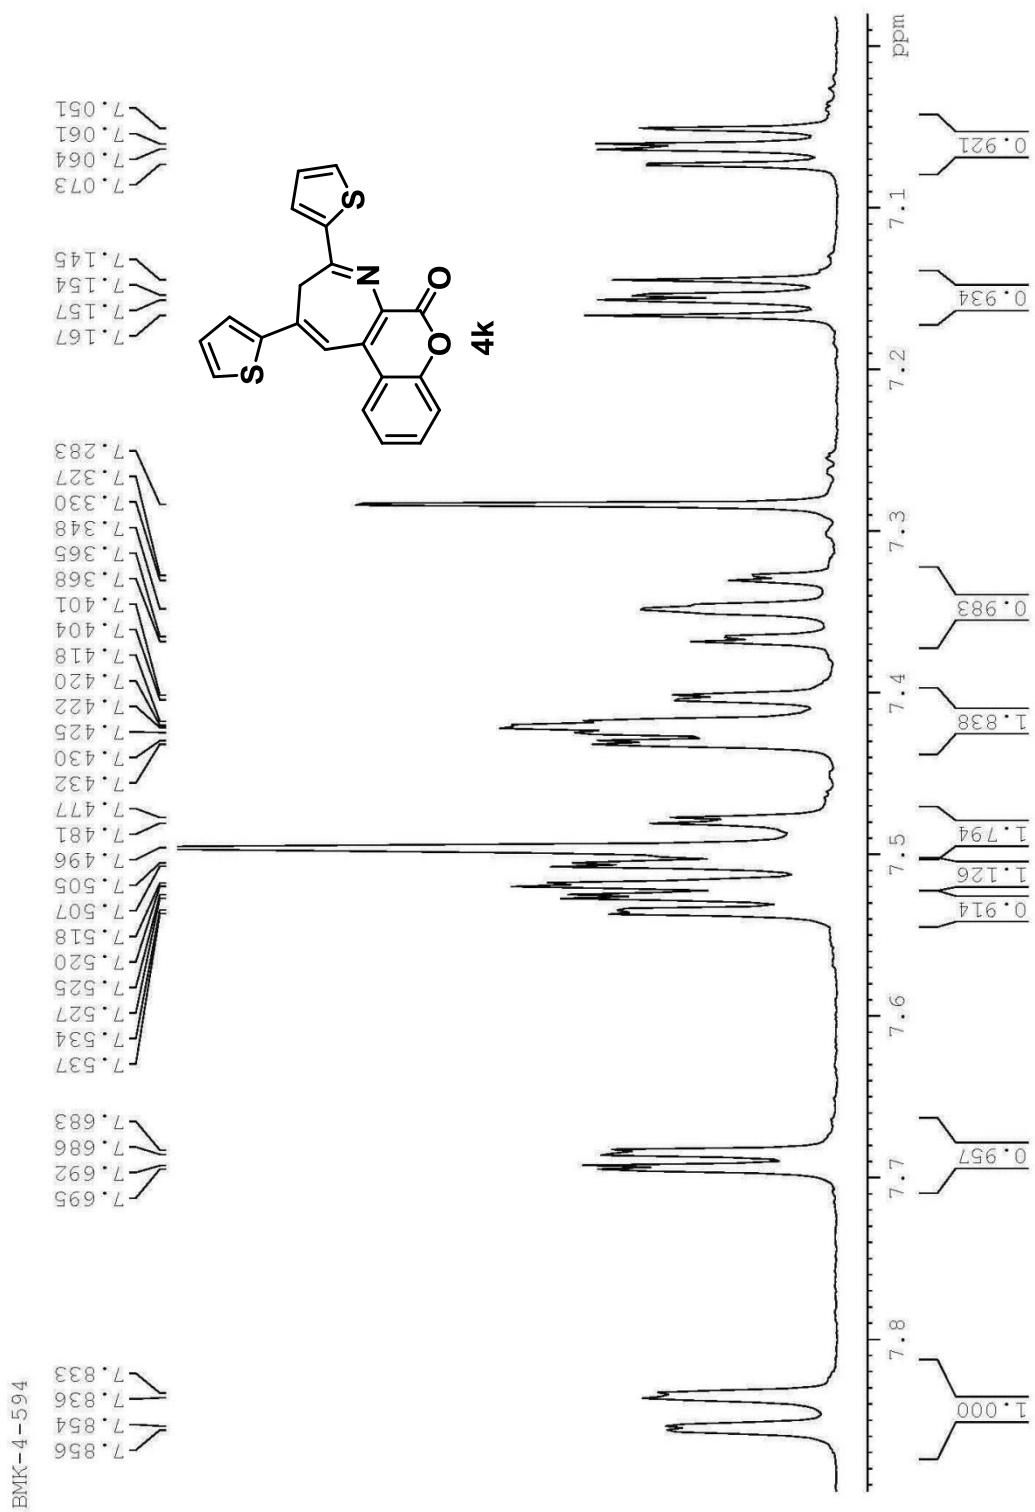

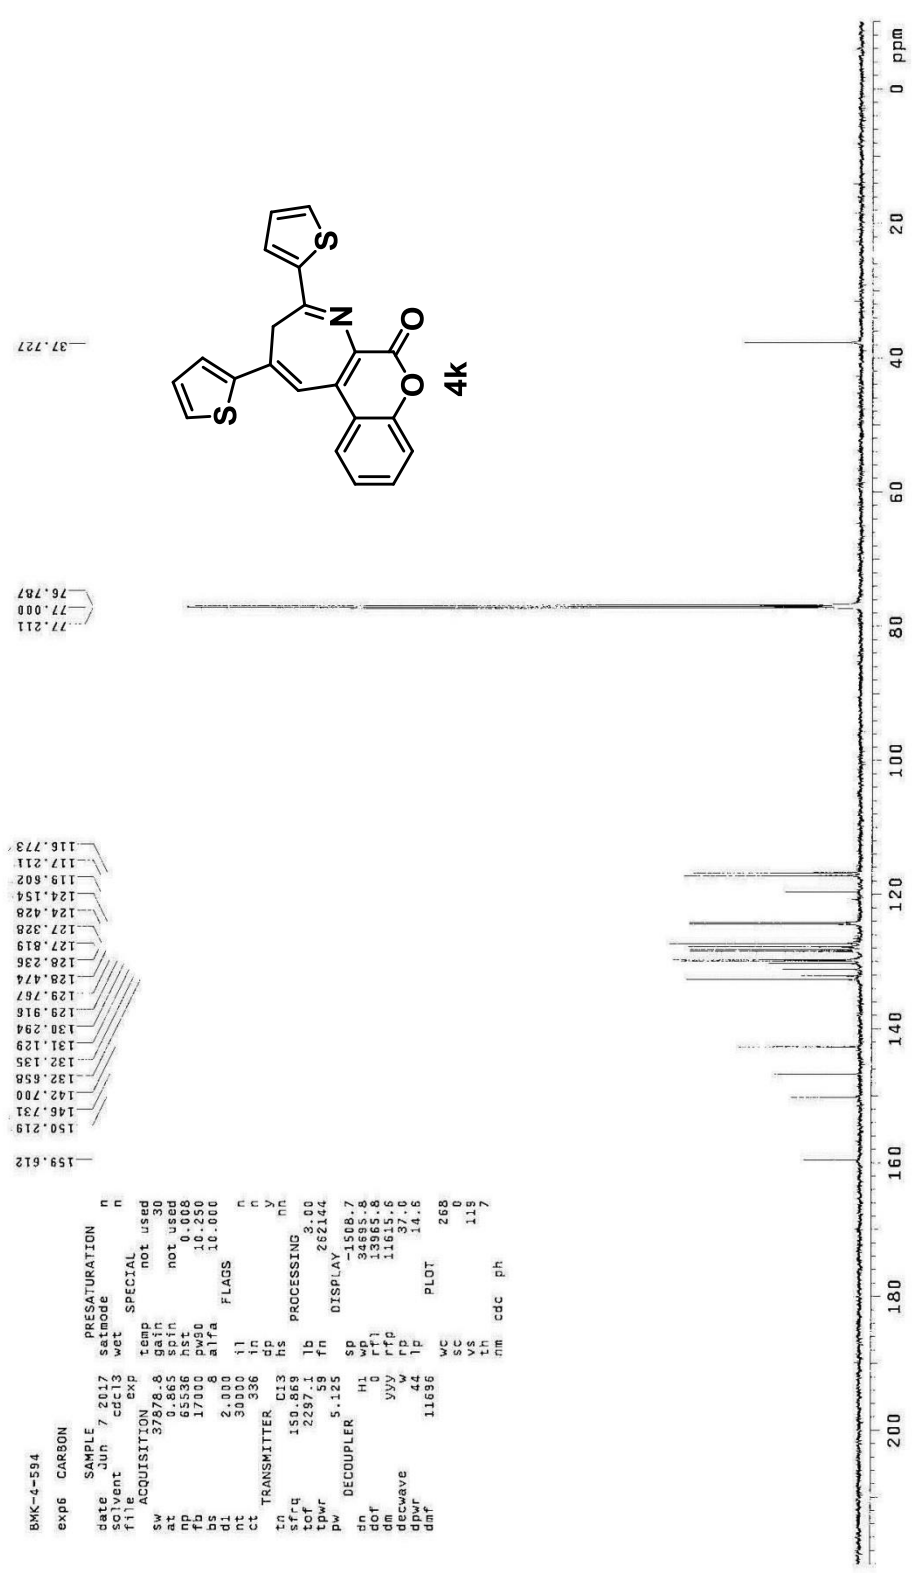

BMK-4-594  
 exp06 CARBON

| date       | SAMPLE   | PRESATURATION | n        |
|------------|----------|---------------|----------|
| Jun 7 2017 | cdc13    | satmode       | n        |
| file       | cdc13    | wet           | SPECIAL  |
| sw         | 372878.8 | temp          | not used |
| at         | 0.865    | spfn          | not used |
| np         | 65536    | hst           | 0.008    |
| fb         | 17000    | pw50          | 10.250   |
| bs         | 2.000    | alfa          | 10.000   |
| dl         | 30000    | l1            | n        |
| ct         | 30000    | l2            | n        |
| ct         | 30000    | l3            | n        |
| ct         | 30000    | l4            | n        |
| ct         | 30000    | l5            | n        |
| ct         | 30000    | l6            | n        |
| ct         | 30000    | l7            | n        |
| ct         | 30000    | l8            | n        |
| ct         | 30000    | l9            | n        |
| ct         | 30000    | l10           | n        |
| ct         | 30000    | l11           | n        |
| ct         | 30000    | l12           | n        |
| ct         | 30000    | l13           | n        |
| ct         | 30000    | l14           | n        |
| ct         | 30000    | l15           | n        |
| ct         | 30000    | l16           | n        |
| ct         | 30000    | l17           | n        |
| ct         | 30000    | l18           | n        |
| ct         | 30000    | l19           | n        |
| ct         | 30000    | l20           | n        |
| ct         | 30000    | l21           | n        |
| ct         | 30000    | l22           | n        |
| ct         | 30000    | l23           | n        |
| ct         | 30000    | l24           | n        |
| ct         | 30000    | l25           | n        |
| ct         | 30000    | l26           | n        |
| ct         | 30000    | l27           | n        |
| ct         | 30000    | l28           | n        |
| ct         | 30000    | l29           | n        |
| ct         | 30000    | l30           | n        |
| ct         | 30000    | l31           | n        |
| ct         | 30000    | l32           | n        |
| ct         | 30000    | l33           | n        |
| ct         | 30000    | l34           | n        |
| ct         | 30000    | l35           | n        |
| ct         | 30000    | l36           | n        |
| ct         | 30000    | l37           | n        |
| ct         | 30000    | l38           | n        |
| ct         | 30000    | l39           | n        |
| ct         | 30000    | l40           | n        |
| ct         | 30000    | l41           | n        |
| ct         | 30000    | l42           | n        |
| ct         | 30000    | l43           | n        |
| ct         | 30000    | l44           | n        |
| ct         | 30000    | l45           | n        |
| ct         | 30000    | l46           | n        |
| ct         | 30000    | l47           | n        |
| ct         | 30000    | l48           | n        |
| ct         | 30000    | l49           | n        |
| ct         | 30000    | l50           | n        |
| ct         | 30000    | l51           | n        |
| ct         | 30000    | l52           | n        |
| ct         | 30000    | l53           | n        |
| ct         | 30000    | l54           | n        |
| ct         | 30000    | l55           | n        |
| ct         | 30000    | l56           | n        |
| ct         | 30000    | l57           | n        |
| ct         | 30000    | l58           | n        |
| ct         | 30000    | l59           | n        |
| ct         | 30000    | l60           | n        |
| ct         | 30000    | l61           | n        |
| ct         | 30000    | l62           | n        |
| ct         | 30000    | l63           | n        |
| ct         | 30000    | l64           | n        |
| ct         | 30000    | l65           | n        |
| ct         | 30000    | l66           | n        |
| ct         | 30000    | l67           | n        |
| ct         | 30000    | l68           | n        |
| ct         | 30000    | l69           | n        |
| ct         | 30000    | l70           | n        |
| ct         | 30000    | l71           | n        |
| ct         | 30000    | l72           | n        |
| ct         | 30000    | l73           | n        |
| ct         | 30000    | l74           | n        |
| ct         | 30000    | l75           | n        |
| ct         | 30000    | l76           | n        |
| ct         | 30000    | l77           | n        |
| ct         | 30000    | l78           | n        |
| ct         | 30000    | l79           | n        |
| ct         | 30000    | l80           | n        |
| ct         | 30000    | l81           | n        |
| ct         | 30000    | l82           | n        |
| ct         | 30000    | l83           | n        |
| ct         | 30000    | l84           | n        |
| ct         | 30000    | l85           | n        |
| ct         | 30000    | l86           | n        |
| ct         | 30000    | l87           | n        |
| ct         | 30000    | l88           | n        |
| ct         | 30000    | l89           | n        |
| ct         | 30000    | l90           | n        |
| ct         | 30000    | l91           | n        |
| ct         | 30000    | l92           | n        |
| ct         | 30000    | l93           | n        |
| ct         | 30000    | l94           | n        |
| ct         | 30000    | l95           | n        |
| ct         | 30000    | l96           | n        |
| ct         | 30000    | l97           | n        |
| ct         | 30000    | l98           | n        |
| ct         | 30000    | l99           | n        |
| ct         | 30000    | l100          | n        |

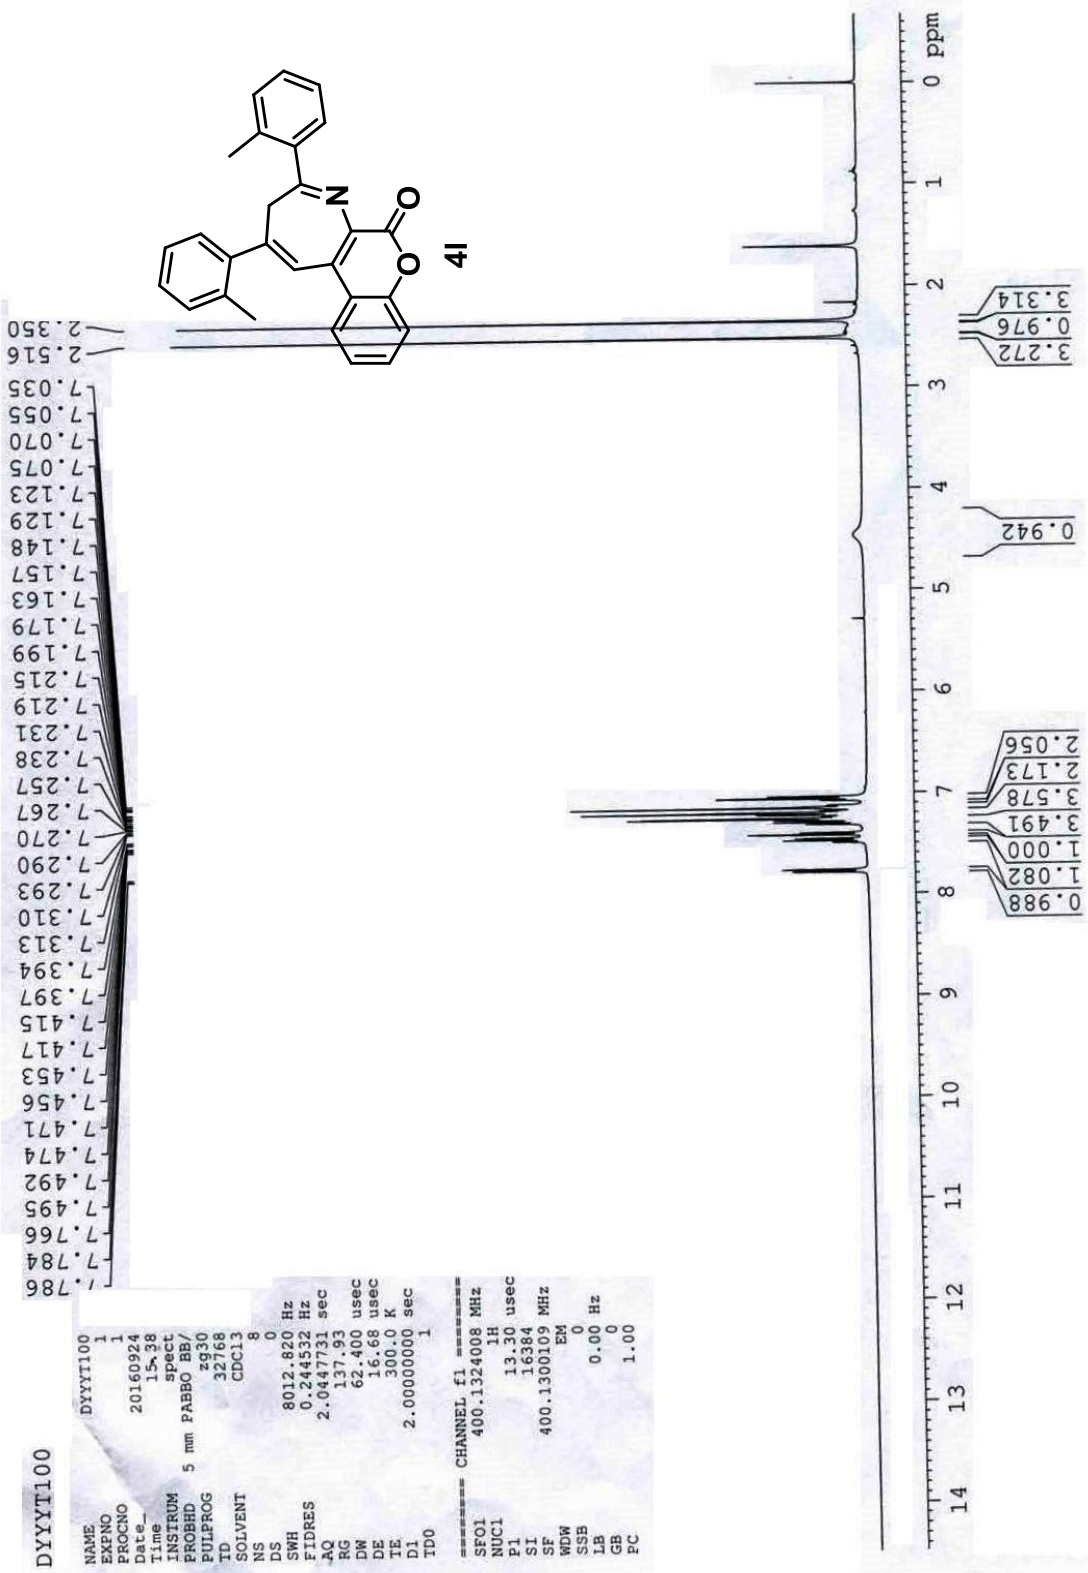

DYYT100

```

NAME          DYYT100
EXPNO         1
PROCNO        1
Date_         20160924
Time          15:38
INSTRUM       spect
PROBHD        5 mm PABBO BB/
PULPROG       zg30
ID            32768
SOLVENT       CDCl3
NS            8
DS            0
SWH           8012.820 Hz
FIDRES        0.244532 Hz
AQ            2.0447731 sec
RG            137.93
DW            62.400 usec
DE            16.68 usec
TE            300.0 K
D1            2.00000000 sec
TD0           1

===== CHANNEL f1 =====
SF01          400.1324008 MHz
NUC1          1H
P1            13.30 usec
SI            16384
SF            400.1300109 MHz
EM            0
WDW           0
SSB           0.00 Hz
LB            0
GB            0
PC            1.00
  
```

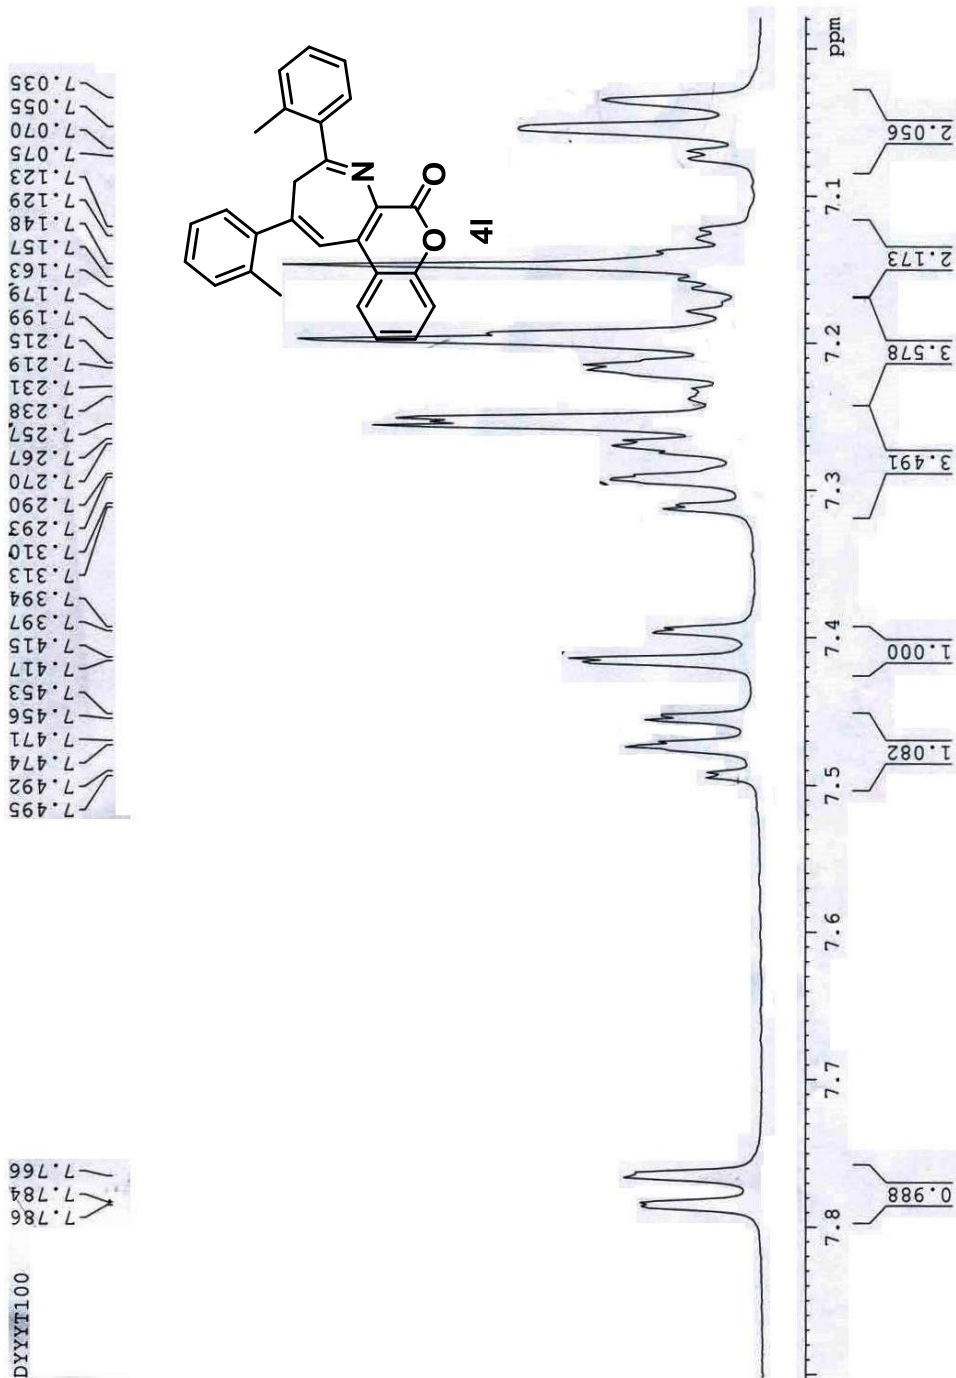

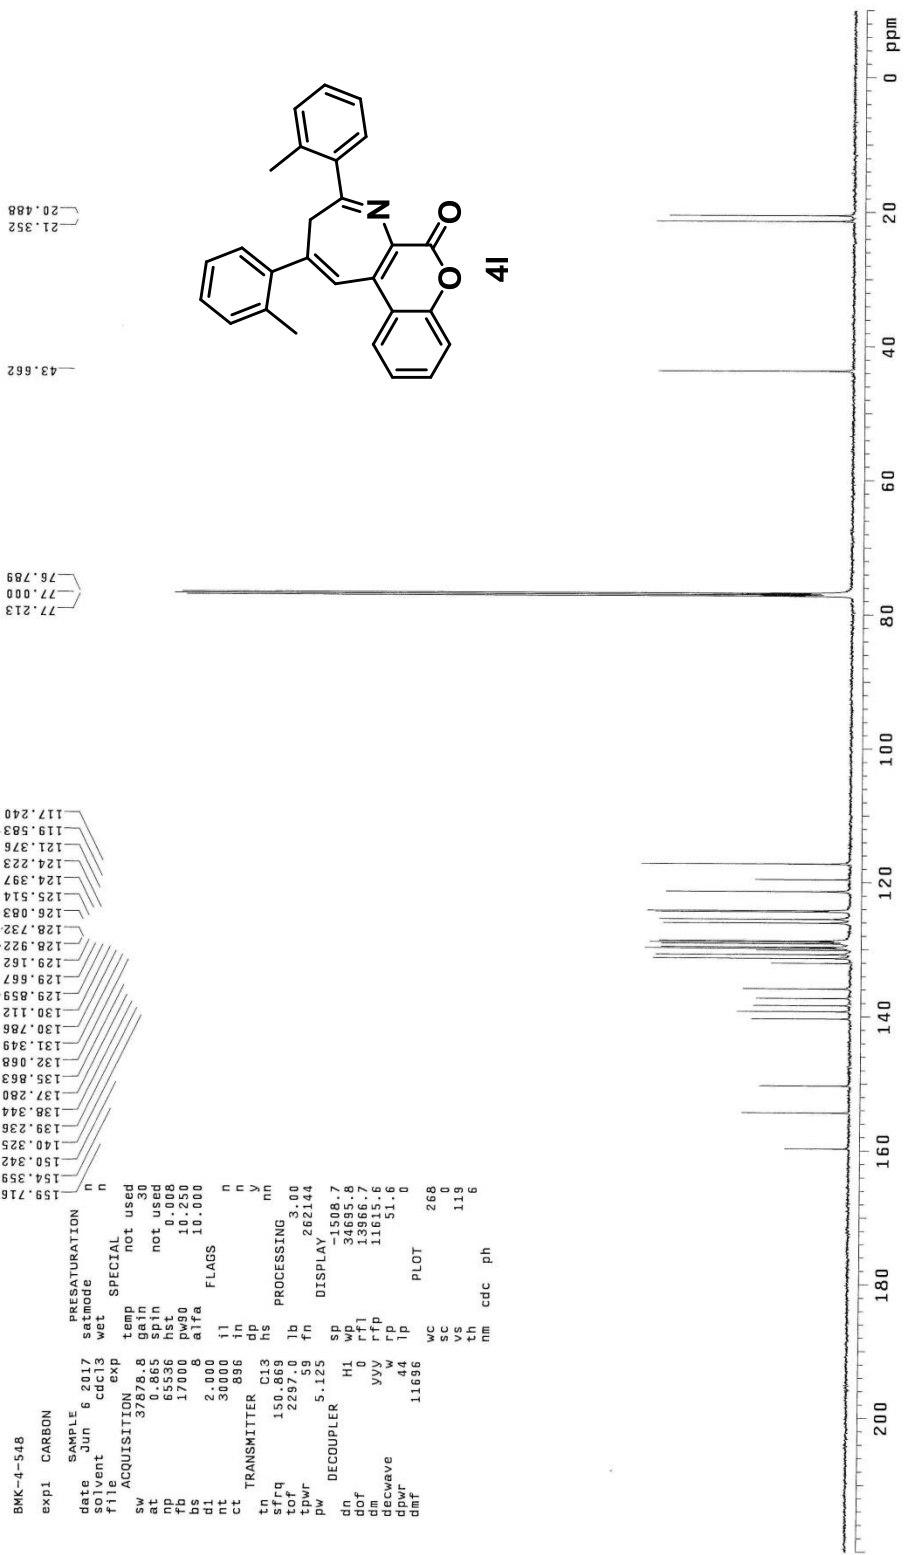

```

BMK-4-548
exp1 CARBON
date SAMPLE
solvent Jun 6 2017
file cdc13
sw 37878.8
at 0.865
pb 1750
bs 4480
d1 2.000
ct 30000
tn TRANSMITTER
sfrc 150.623
tof 2287.0
tpwr 59
pw 5.125
dn DECOUPLER
dof 0
decwave vvy
dpcr 44
dmf 11656
PRESATURATION
satmode n
wet SPECIAL
temp not used
gain 30
spin not used
ns 0.008
ns2 11.000
rtfa 10.000
flags
n n
dp y
ns ns
pb PROCESSING
tn 282144
sp -1508.7
h1 wd
rfl 34695.8
rfp 13866.7
rfb 11615.6
tp 31.0
wc 268
sc 0
vs 119
ch n
nm cdc
ph 6

```

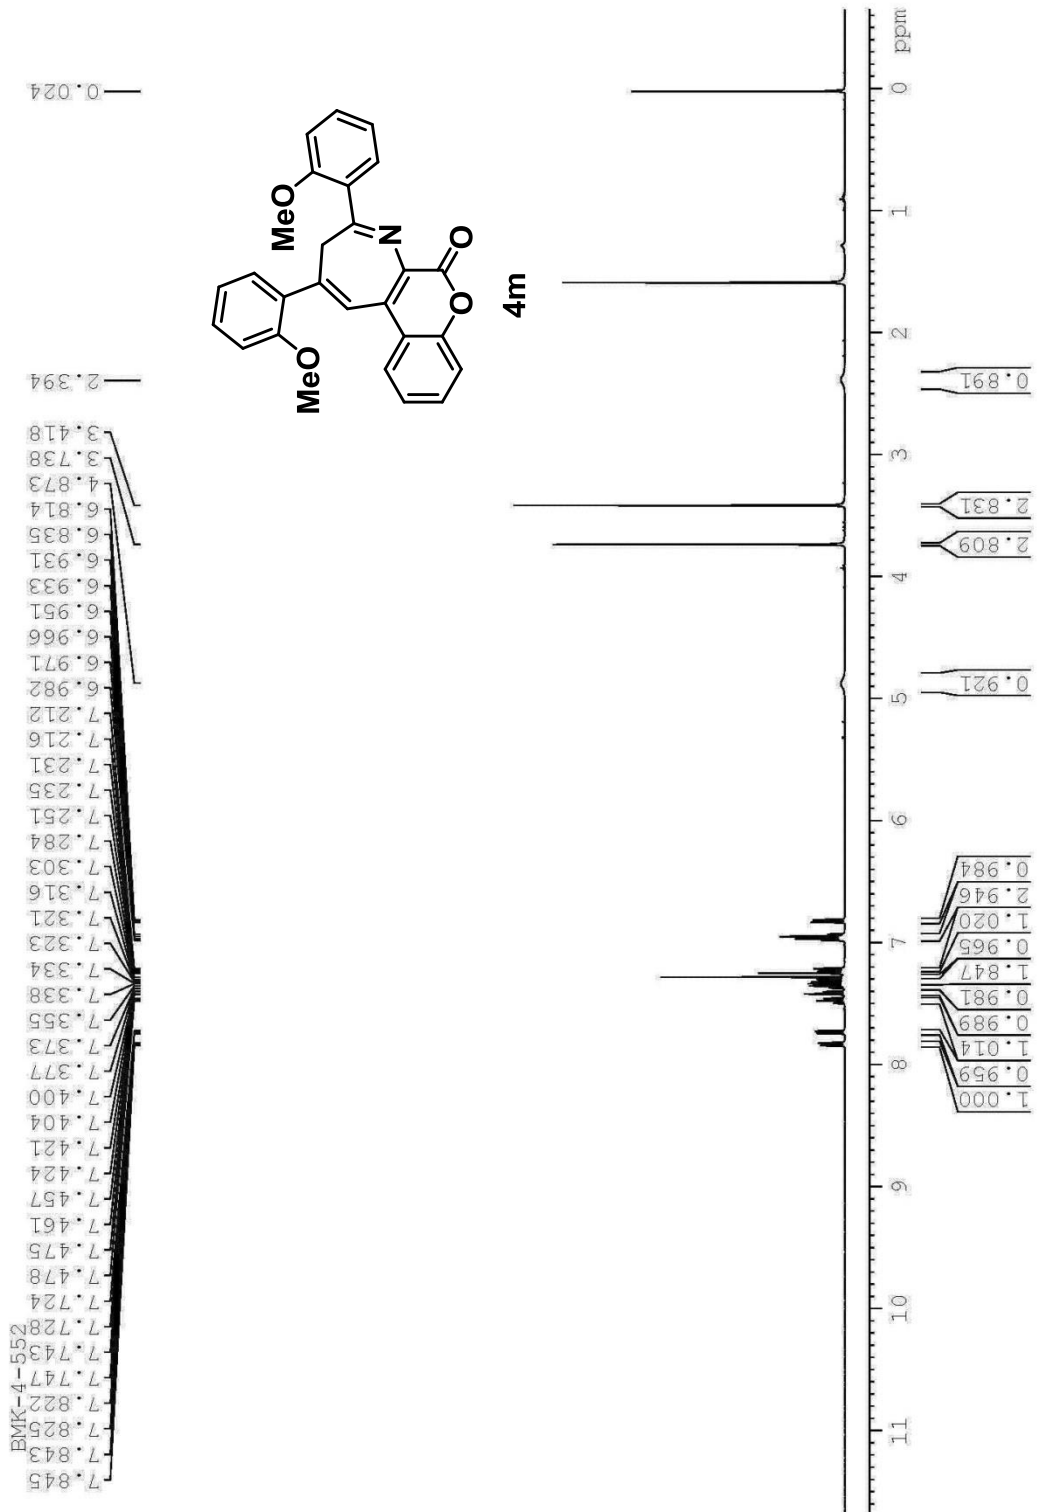



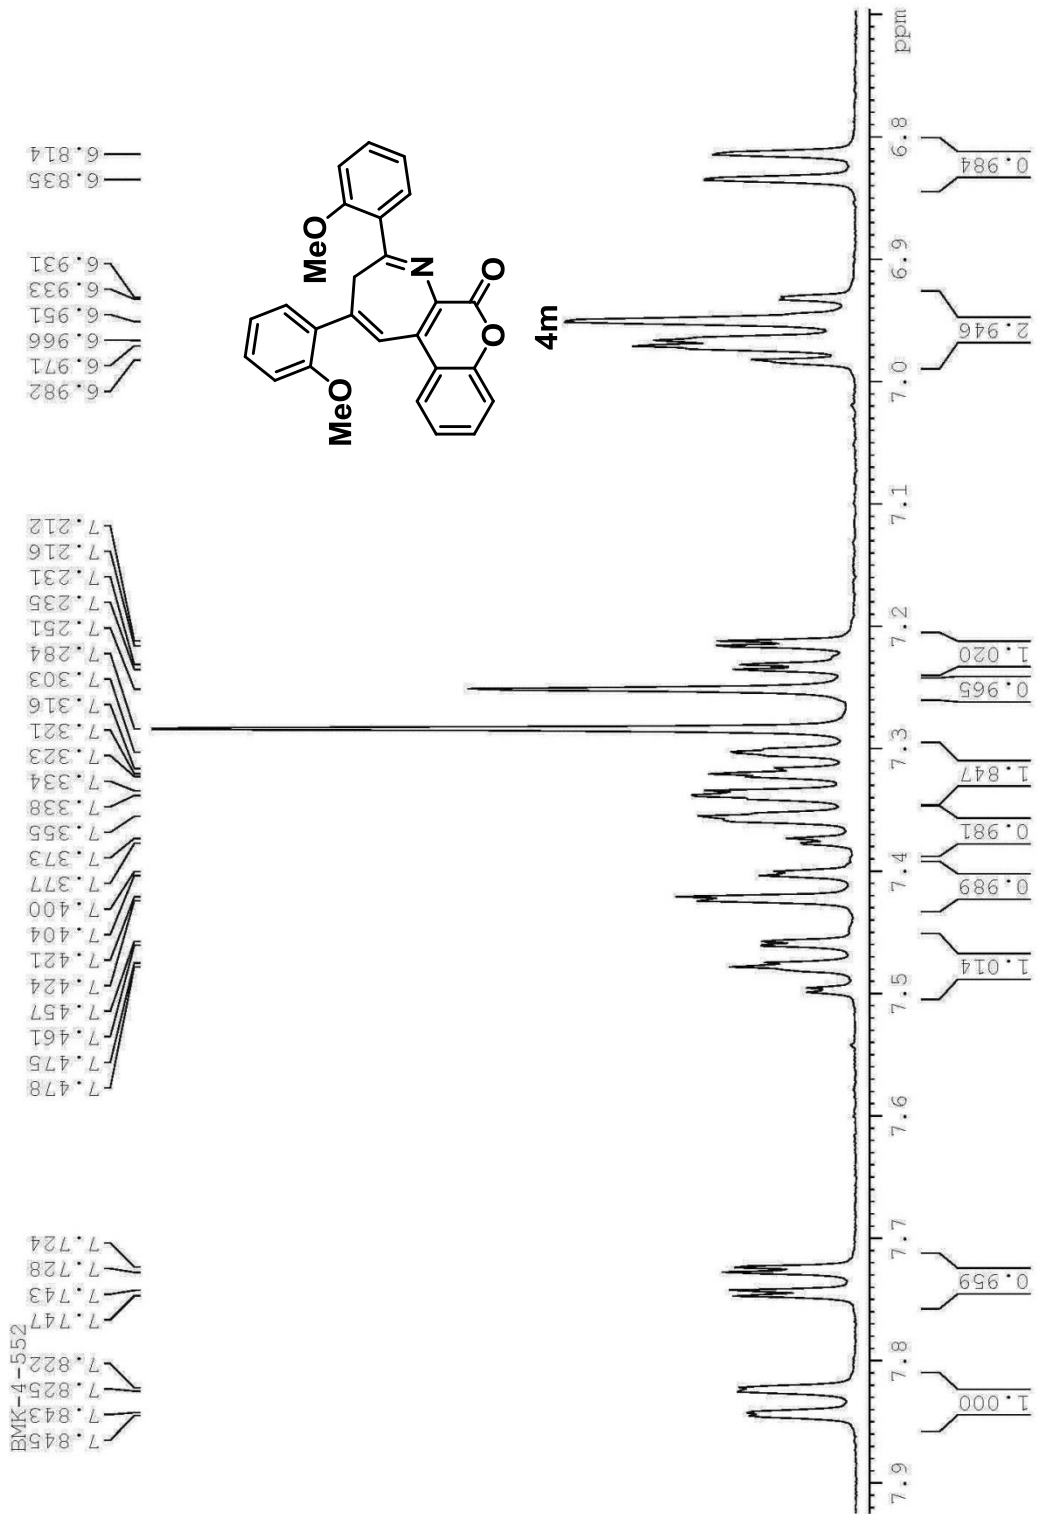

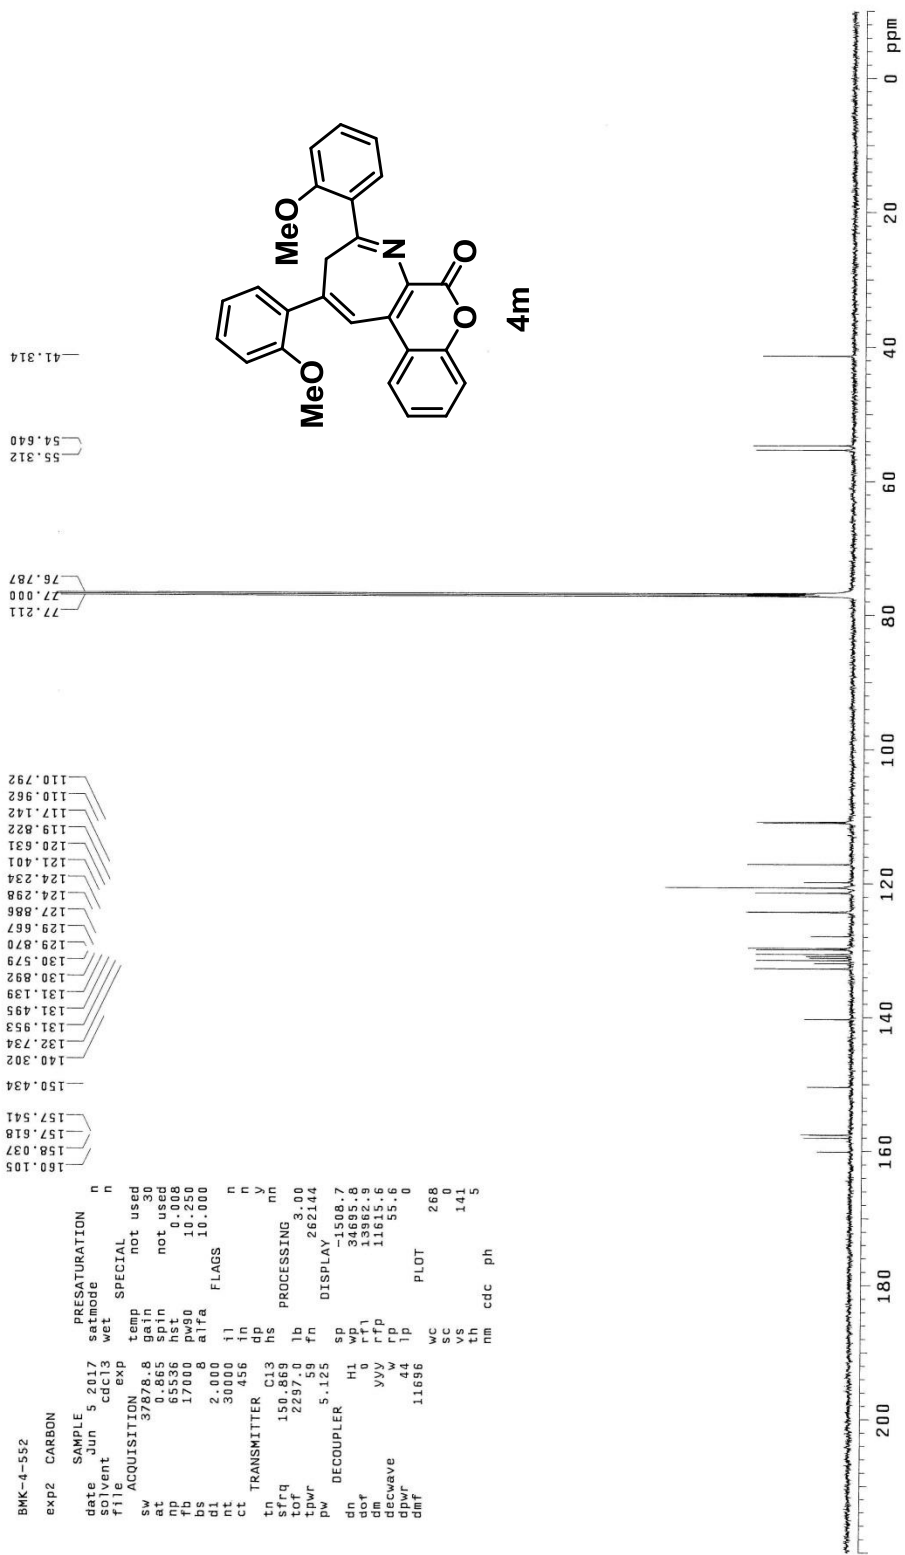

```

BMK-4-552
exp2 CARBON
date SAMPLE
  Jun 5, 2017
  ccc13 satmode
  file wet SPECIAL
  Title not used
  sw 37878.8 gain
  at 0.865 spin
  pp 65536 hst
  qb 17000 pw90
  rs 2.000 alpha
  ct 30000 fl
  TRANSMITTER 456
  tn n
  sfreq 150.869
  tot 2297.0
  t1 5.125
  pw DECOUPLER 5.125
  dn H1
  dor 0
  dm cwave
  dpr 4x
  dmf 11696
  wc 268
  sc 0
  vs 141
  th nm
  cdc cdc
  ph 5
  
```

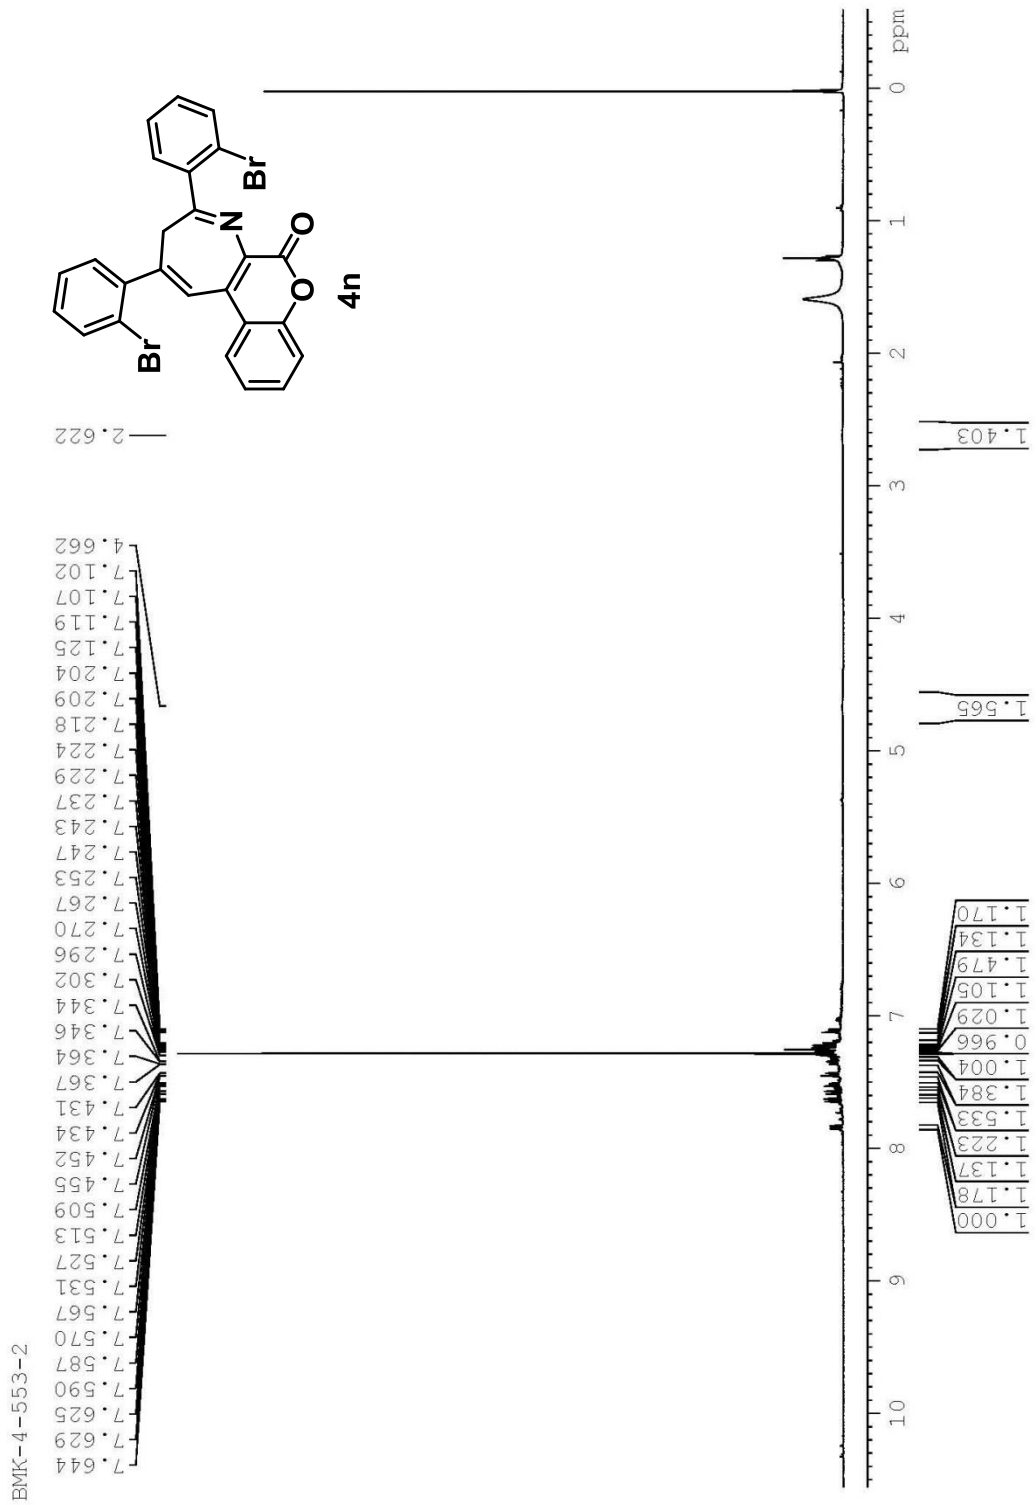

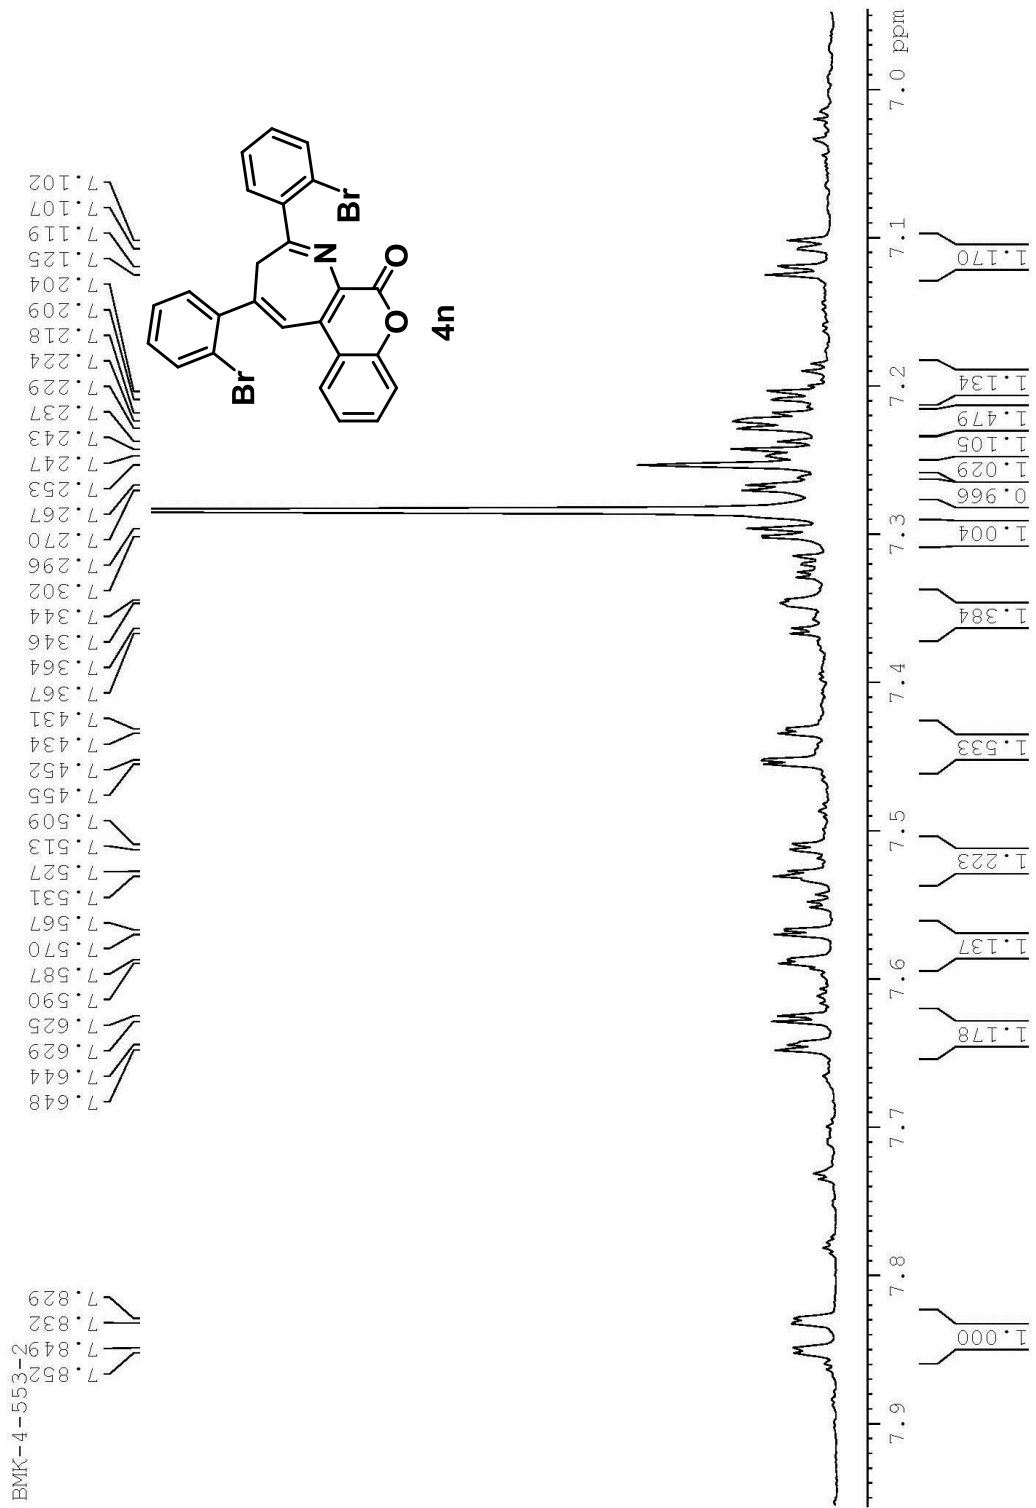

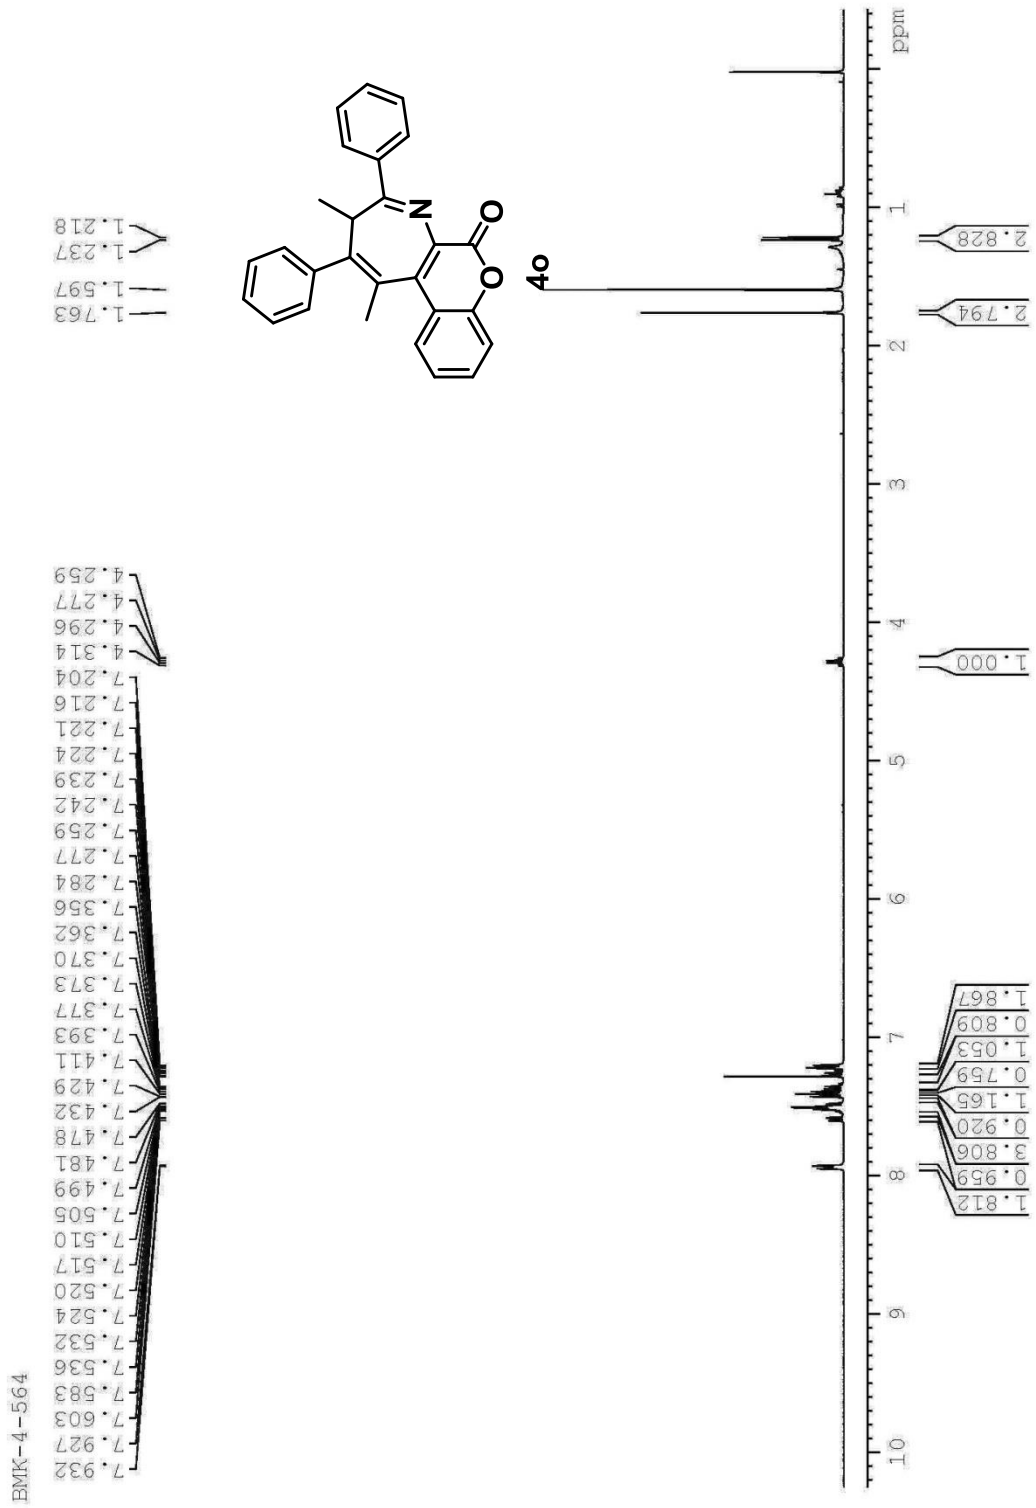

BMK-4-564

7.951  
7.944  
7.940  
7.932  
7.927  
7.603  
7.583  
7.536  
7.532  
7.524  
7.520  
7.517  
7.510  
7.505  
7.499  
7.481  
7.478  
7.432  
7.429  
7.411  
7.393  
7.377  
7.373  
7.370  
7.362  
7.356  
7.284  
7.277  
7.259  
7.242  
7.239  
7.224  
7.221  
7.216  
7.204

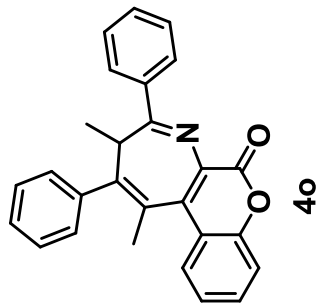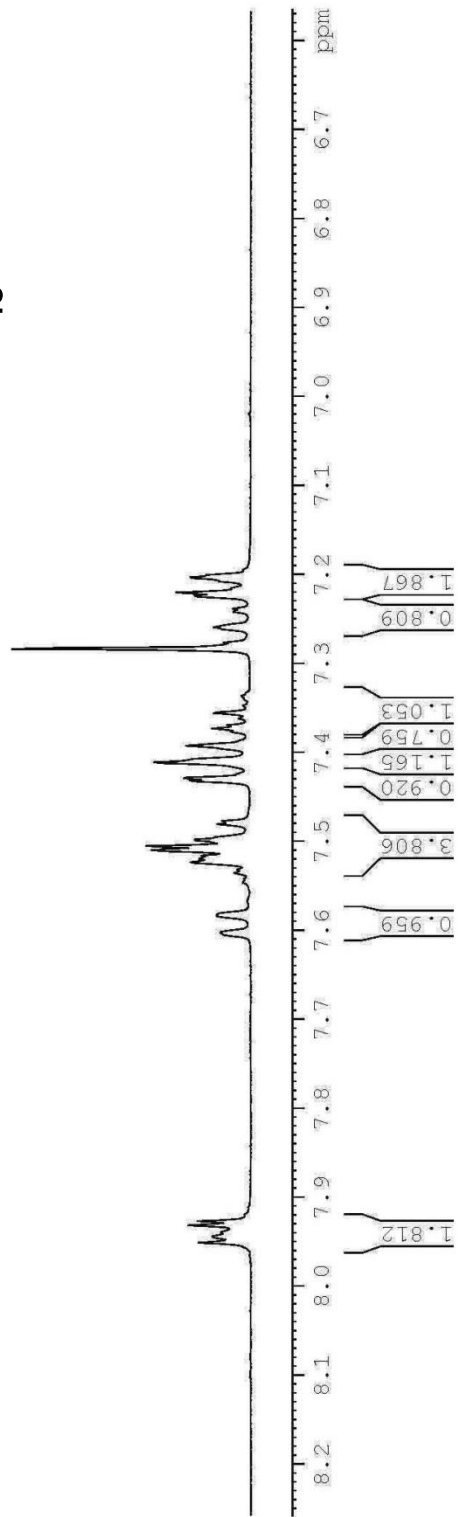

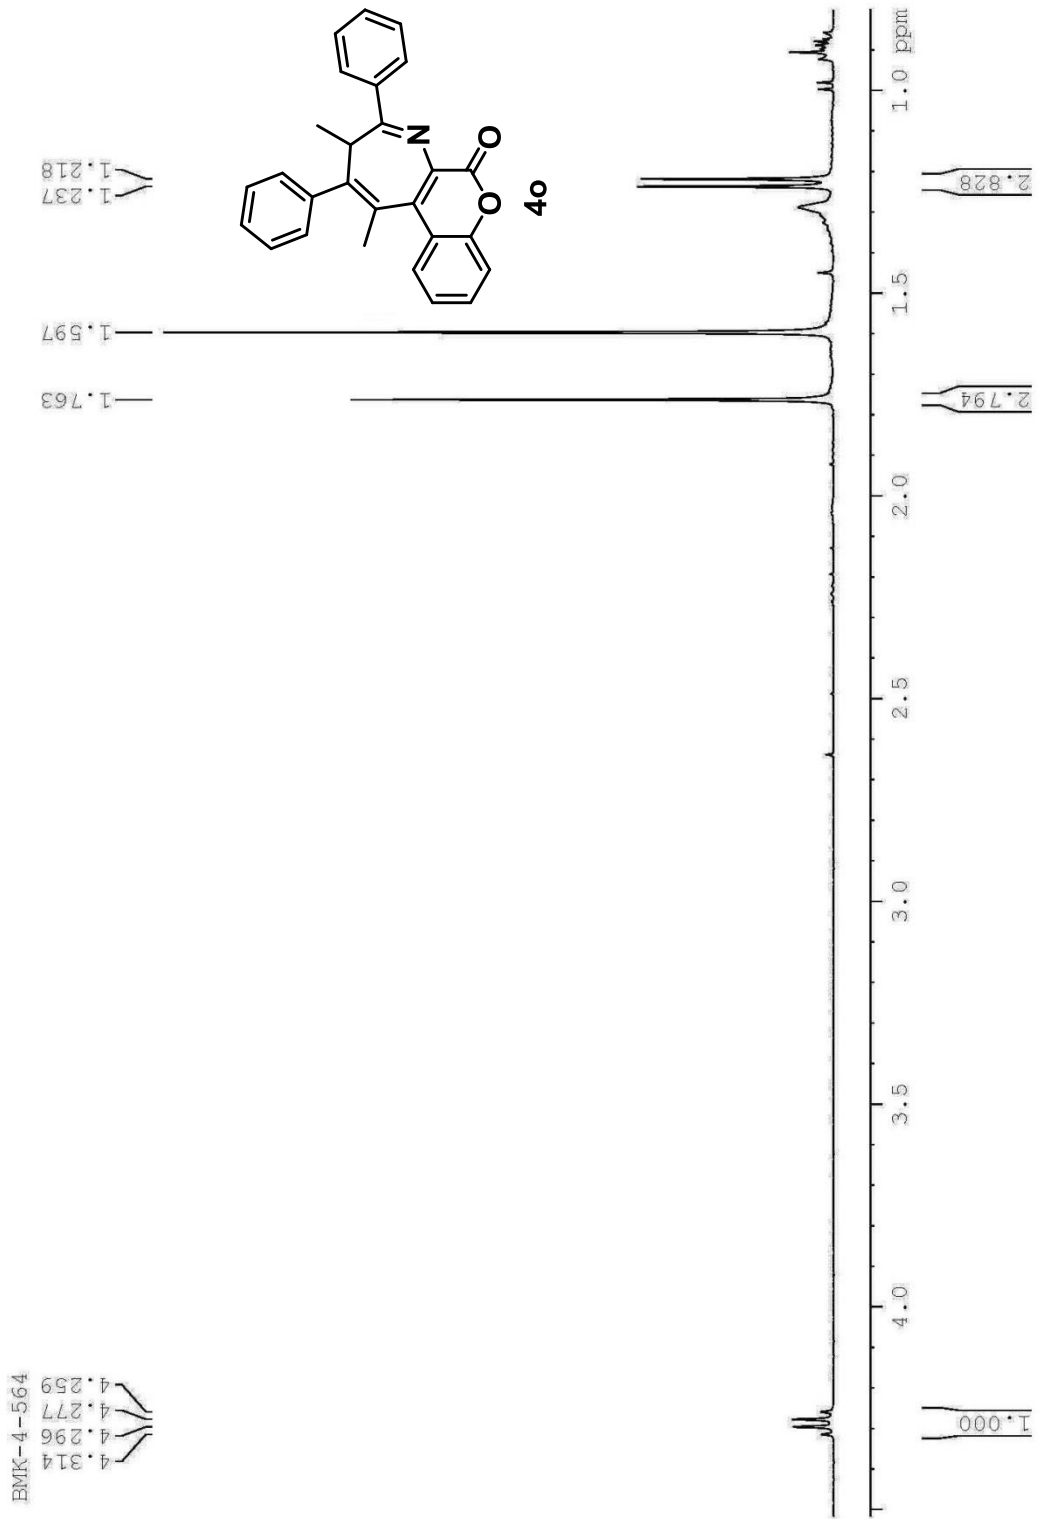

```

BMK-4-584
exp2 CARBON
date SAMPLE 6 2017
solvent Jun cdc13 satmode n
T1 cdc13 wet SPECIAL n
ACQUISITION exp temp not used
SW 37878.8 gain 30
np 0.865 spfn not used
fb 85536 hst 0.008
ds 17000 pw80 10.250
d1 2.000 alfa 10.000
ct 30976 in n
CT TRANSMITTER C13 hs n
tn 150.869 vs V
sffq 2297.0 lb 3.00
tof 262144
pwr 5.125 sp DISPLAY 1508.7
dn DECOUPLER H1 wd 34695.8
dm 0 rfl 13861.8
dm deccave w rfp 11615.6
dpr 4.0 rfp 36.0
bnf 11696 wc PLOT 268
sc 0
vs 119
th 4
nm cdc ph
  
```

```

159.446
152.694
150.555
142.281
139.733
137.683
130.736
130.388
130.365
128.840
128.685
128.522
127.757
127.552
125.616
124.527
123.982
119.054
117.294
  
```

```

77.213
77.000
76.789
36.996
19.674
11.737
  
```

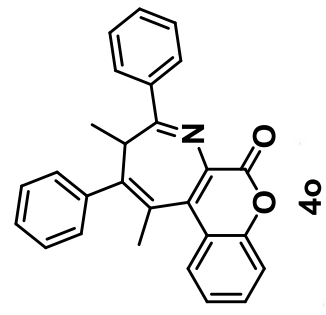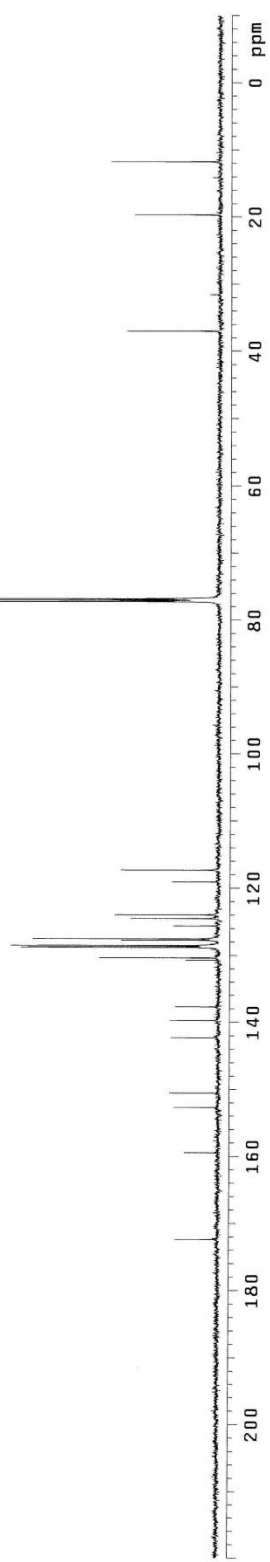

Supplement: c7ra09289j1.pdf [file c7ra09289j1.pdf]
